# Supplementary material for: Multi-parameter watershed water quality level prediction based on integrated algorithms
Source: Research Square preprint supplement (doi:10.21203/rs.3.rs-6973221/v1), 2025-07-21
Supplement: Supplementary file 1 [file 848e3ac4fb89f6c4d934a41c.xlsx]

## Sheet: Sheet1
no	hl	timechuo	ztsw（水温）	ztsjd（PH）	ztrjy(DO)	gmsyzs(COD)	ztad(NH4)	ztzl(TP)	ztzd(TN)	ztddl(EC)	ztzd(NTU)	lb	zt
1	A	2023-05-01	0.722496	0.68364	0.629962	0.875507	0.994203	0.976645	0.984021	0.866123	0.990898	3	1
2	B	2023-05-01	0.764296	0.612345	0.662413	0.891291	1	0.978769	0.972533	0.876267	0.99611	3	0
3	C	2023-05-01	0.89463	0.68165	0.609247	0.935738	0.992458	0.988171	0.963624	0.892087	0.9996	3	1
4	D	2023-05-01	0.849289	0.610535	0.507246	0.865758	1	0.968456	0.989246	0.949545	0.985598	4	1
5	E	2023-05-01	0.826415	0.658488	0.579371	0.952716	1	0.998483	0.996268	0.9521	0.997089	2	1
6	F	2023-05-01	0.808128	0.595697	0.560137	0.816384	1	0.990112	0.98435	0.927177	0.99808	4	1
7	G	2023-05-01	0.661538	0.528382	0.548086	0.94106	1	0.985745	0.962079	0.880194	0.998509	2	1
8	H	2023-05-01	0.81672	0.472106	0.693683	0.882186	1	0.974522	0.964146	0.838126	0.994274	3	1
9	G	2023-05-01	0.767721	0.459258	0.547062	0.894656	0.983733	0.969063	0.960876	0.616533	0.995869	3	1
10	I	2023-05-01	0.897533	0.625011	0.536429	0.656037	1	0.982712	0.989145	0.928599	0.996843	6	1
11	H	2023-05-01	0.703628	0.552902	0.625307	0.930064	0.983333	0.979042	0.953994	0.827545	0.997121	2	1
12	J	2023-05-01	0.777358	0.54503	0.586917	0.902793	1	0.978769	0.97478	0.898251	0.991256	3	1
13	H	2023-05-01	0.765457	0.599135	0.599086	0.878007	0.972981	0.968972	0.929476	0.843123	0.986153	3	1
14	J	2023-05-01	0.883599	0.712773	0.552142	0.901693	1	0.972642	0.976726	0.928973	0.989335	3	1
15	K	2023-05-01	0.809869	0.665364	0.594282	0.86402	0.979888	0.961905	0.975061	0.905619	0.972608	4	1
16	H	2023-05-01	0.732656	0.593272	0.712492	0.921553	0.989515	0.979891	0.943761	0.82858	0.995081	2	1
17	L	2023-05-01	0.76836	0.513725	0.555135	0.972949	1	0.995147	0.984089	0.927143	0.995741	2	1
18	F	2023-05-01	0.78926	0.610969	0.592194	0.92461	0.999823	0.993934	0.97496	0.92809	0.999257	2	1
19	M	2023-05-01	0.761974	0.528021	0.600937	0.856125	0.994232	0.968759	0.995566	0.806859	0.982812	5	1
20	N	2023-05-01	0.832801	0.768272	0.64603	0.922124	0.966785	0.975614	0.945507	0.930458	0.989814	2	1
21	O	2023-05-01	0.84238	0.675135	0.570258	0.909501	0.969743	0.986018	0.954194	0.933299	0.987954	3	1
22	N	2023-05-01	0.963541	0.666811	0.767328	0.945129	0.987134	0.972702	0.967838	0.881345	0.999137	2	1
23	P	2023-05-01	0.868215	0.62863	0.581522	0.911172	1	0.992053	0.973837	0.908607	0.99975	3	1
24	Q	2023-05-01	0.829608	0.717695	0.517486	0.929228	1	0.995511	0.976666	0.950486	0.999476	2	1
25	H	2023-05-01	0.742816	0.502687	0.551985	0.896437	1	0.964786	0.943039	0.780344	0.996335	3	1
26	R	2023-05-01	0.737591	0.607332	0.509609	0.900946	0.990491	0.978526	0.973757	0.768371	0.999155	3	1
27	S	2023-05-01	0.763425	0.453468	0.425173	0.823818	0.845371	0.947316	0.875905	0.630948	0.997141	4	1
28	T	2023-05-01	0.793033	0.557697	0.578095	0.957576	1	0.994844	0.953031	0.845856	0.995847	2	1
29	I	2023-05-01	0.839478	0.651752	0.709515	0.692545	1	0.984107	0.986377	0.897465	0.997796	5	1
30	A	2023-05-01 04:00:00	0.72627	0.684907	0.634688	0.875507	0.994203	0.976645	0.984021	0.865041	0.990842	3	1
31	B	2023-05-01 04:00:00	0.776778	0.637678	0.66072	0.891291	1	0.978769	0.972533	0.8788	0.996763	3	0
32	C	2023-05-01 04:00:00	0.896372	0.681342	0.610192	0.935738	0.992458	0.988171	0.963624	0.893433	0.999591	3	1
33	D	2023-05-01 04:00:00	0.855036	0.618678	0.524023	0.865758	1	0.968456	0.989246	0.947499	0.985188	4	1
34	E	2023-05-01 04:00:00	0.848186	0.680745	0.591233	0.94183	1	0.998483	0.995385	0.951778	0.997275	2	1
35	F	2023-05-01 04:00:00	0.827286	0.632068	0.584909	0.816384	1	0.989748	0.983247	0.928416	0.998081	4	1
36	G	2023-05-01 04:00:00	0.672859	0.54304	0.581719	0.94106	1	0.985138	0.963363	0.879044	0.998474	2	1
37	H	2023-05-01 04:00:00	0.820174	0.478801	0.697503	0.882186	1	0.974522	0.964146	0.838307	0.993798	3	1
38	G	2023-05-01 04:00:00	0.775733	0.456363	0.547653	0.894656	0.983733	0.969063	0.960876	0.619848	0.996703	3	1
39	I	2023-05-01 04:00:00	0.902467	0.63243	0.539776	0.656037	1	0.983318	0.987881	0.929956	0.997032	6	1
40	H	2023-05-01 04:00:00	0.710885	0.557009	0.623622	0.930064	0.983333	0.979042	0.953994	0.826405	0.997138	2	1
41	J	2023-05-01 04:00:00	0.780842	0.546116	0.586484	0.902793	1	0.978769	0.97478	0.897791	0.991277	3	1
42	H	2023-05-01 04:00:00	0.76894	0.600709	0.599441	0.878007	0.972981	0.968972	0.929476	0.842852	0.989235	3	1
43	J	2023-05-01 04:00:00	0.920174	0.717116	0.553639	0.890477	1	0.972975	0.976927	0.929916	0.988928	3	1
44	K	2023-05-01 04:00:00	0.822642	0.670611	0.594636	0.86402	0.979888	0.961905	0.975061	0.906483	0.974592	4	1
45	H	2023-05-01 04:00:00	0.732656	0.591933	0.712067	0.921553	0.989515	0.979891	0.943761	0.822555	0.994956	2	1
46	L	2023-05-01 04:00:00	0.785776	0.532906	0.572464	0.972949	1	0.995147	0.984089	0.927346	0.995846	2	1
47	F	2023-05-01 04:00:00	0.797097	0.633643	0.602788	0.92461	0.999823	0.993934	0.97496	0.927007	0.999303	2	1
48	M	2023-05-01 04:00:00	0.775036	0.529649	0.597511	0.853398	0.993197	0.96785	0.988443	0.80687	0.982547	5	1
49	N	2023-05-01 04:00:00	0.842671	0.774171	0.642171	0.922124	0.966785	0.975614	0.945507	0.928496	0.988725	2	1
50	O	2023-05-01 04:00:00	0.853411	0.678031	0.566281	0.897119	0.970941	0.985896	0.954415	0.929984	0.987122	3	1
51	N	2023-05-01 04:00:00	0.980871	0.669526	0.817541	0.945129	0.987134	0.972702	0.967838	0.874409	0.999283	4	1
52	P	2023-05-01 04:00:00	0.869666	0.629173	0.583097	0.911172	1	0.992053	0.973837	0.908539	0.999741	3	1
53	Q	2023-05-01 04:00:00	0.833382	0.722762	0.519652	0.929228	1	0.995511	0.976666	0.950415	0.999384	2	1
54	H	2023-05-01 04:00:00	0.748331	0.518973	0.550016	0.906532	1	0.964271	0.943019	0.788801	0.996197	3	1
55	R	2023-05-01 04:00:00	0.757068	0.647992	0.555529	0.900946	0.990491	0.978526	0.973757	0.763365	0.999166	3	1
56	S	2023-05-01 04:00:00	0.771843	0.481516	0.473535	0.823818	0.845371	0.947316	0.875905	0.632464	0.997409	4	1
57	T	2023-05-01 04:00:00	0.800871	0.564211	0.578962	0.957576	1	0.994844	0.953031	0.846972	0.996026	2	1
58	I	2023-05-01 04:00:00	0.840348	0.651375	0.719754	0.698043	1	0.985047	0.985935	0.898202	0.997717	5	1
59	A	2023-05-01 08:00:00	0.72627	0.685631	0.637051	0.869479	0.993567	0.975978	0.983524	0.86335	0.99068	4	1
60	B	2023-05-01 08:00:00	0.75791	0.628268	0.631971	0.898175	0.99793	0.971793	0.9687	0.878189	0.997091	3	1
61	C	2023-05-01 08:00:00	0.89434	0.680148	0.607199	0.926479	0.993094	0.987928	0.962681	0.893711	0.999581	3	1
62	D	2023-05-01 08:00:00	0.799245	0.615059	0.527528	0.858984	1	0.96148	0.986638	0.946986	0.984627	4	1
63	E	2023-05-01 08:00:00	0.851089	0.671878	0.577556	0.937189	1	0.997938	0.995726	0.951814	0.996921	2	1
64	F	2023-05-01 08:00:00	0.816836	0.618859	0.558877	0.803255	1	0.989748	0.982203	0.929805	0.998083	4	1
65	G	2023-05-01 08:00:00	0.672569	0.574706	0.585539	0.94172	1	0.985138	0.9624	0.876947	0.998357	2	1
66	H	2023-05-01 08:00:00	0.812221	0.448944	0.674504	0.891555	1	0.974826	0.963725	0.838578	0.994782	3	1
67	G	2023-05-01 08:00:00	0.756952	0.438992	0.521621	0.899736	0.988909	0.972399	0.964387	0.615963	0.996772	3	1
68	I	2023-05-01 08:00:00	0.88418	0.63424	0.536744	0.641522	1	0.983015	0.988142	0.931709	0.996838	6	1
69	H	2023-05-01 08:00:00	0.707112	0.559832	0.625417	0.925445	0.98462	0.979406	0.950462	0.826329	0.997363	2	1
70	J	2023-05-01 08:00:00	0.772424	0.545211	0.585933	0.88234	1	0.978465	0.974679	0.897771	0.990897	3	1
71	H	2023-05-01 08:00:00	0.745718	0.598484	0.591052	0.878007	0.970985	0.968426	0.928192	0.843461	0.989462	3	1
72	K	2023-05-01 08:00:00	0.815675	0.670611	0.59054	0.861315	0.984176	0.954443	0.972834	0.907043	0.9806	4	1
73	H	2023-05-01 08:00:00	0.729753	0.588604	0.71658	0.915835	0.989234	0.979436	0.952148	0.817591	0.99511	3	1
74	L	2023-05-01 08:00:00	0.777068	0.540687	0.5638	0.974929	1	0.994844	0.98427	0.927549	0.995916	2	1
75	F	2023-05-01 08:00:00	0.781713	0.645875	0.594006	0.925357	1	0.994359	0.969503	0.926196	0.999318	2	1
76	N	2023-05-01 08:00:00	0.837446	0.771855	0.634097	0.884429	0.970689	0.969184	0.938665	0.927143	0.987371	3	1
77	O	2023-05-01 08:00:00	0.844993	0.677669	0.557932	0.875984	0.972493	0.983773	0.950643	0.931202	0.986552	3	1
78	N	2023-05-01 08:00:00	0.980058	0.664459	0.818801	0.956125	0.986838	0.968759	0.97175	0.87971	0.999256	4	1
79	P	2023-05-01 08:00:00	0.857184	0.629173	0.57908	0.906708	1	0.991932	0.973395	0.909148	0.999739	3	1
80	Q	2023-05-01 08:00:00	0.829028	0.697465	0.505356	0.926061	1	0.994783	0.976545	0.950674	0.999446	2	1
81	R	2023-05-01 08:00:00	0.74955	0.644844	0.505907	0.912624	0.990077	0.980042	0.973516	0.7612	0.999096	3	1
82	S	2023-05-01 08:00:00	0.773295	0.471925	0.427654	0.841566	0.820319	0.946739	0.876066	0.629541	0.997598	4	1
83	T	2023-05-01 08:00:00	0.796807	0.557516	0.578095	0.952342	1	0.994844	0.952048	0.84727	0.996056	2	1
84	I	2023-05-01 08:00:00	0.839478	0.652107	0.726055	0.696943	1	0.984622	0.986979	0.899129	0.997781	5	1
85	A	2023-05-01 12:00:00	0.718433	0.68364	0.633113	0.872298	0.993227	0.976433	0.983504	0.863282	0.990948	4	1
86	B	2023-05-01 12:00:00	0.71553	0.514992	0.574275	0.886101	1	0.977859	0.973777	0.880688	0.99733	3	1
87	C	2023-05-01 12:00:00	0.881858	0.67595	0.59952	0.929822	0.996525	0.986928	0.964848	0.897627	0.999575	3	1
88	D	2023-05-01 12:00:00	0.727866	0.611259	0.530836	0.844997	0.999556	0.96512	0.987179	0.945976	0.990256	4	1
89	E	2023-05-01 12:00:00	0.78926	0.631164	0.551008	0.956895	1	0.997938	0.995967	0.952743	0.996406	2	1
90	F	2023-05-01 12:00:00	0.740203	0.549192	0.50508	0.803255	1	0.989506	0.981822	0.929339	0.998267	4	1
91	G	2023-05-01 12:00:00	0.658055	0.588459	0.579119	0.938421	1	0.984835	0.959551	0.872685	0.998439	2	1
92	H	2023-05-01 12:00:00	0.775239	0.418363	0.653867	0.892852	1	0.973916	0.964186	0.83841	0.994665	3	1
93	G	2023-05-01 12:00:00	0.727373	0.412754	0.484483	0.889026	0.990979	0.971186	0.960916	0.588905	0.997245	3	1
94	I	2023-05-01 12:00:00	0.863861	0.635507	0.533908	0.6468	1	0.983015	0.986918	0.932245	0.996881	6	1
95	H	2023-05-01 12:00:00	0.696952	0.56251	0.623007	0.929734	0.981662	0.979648	0.953051	0.825887	0.997475	2	1
96	J	2023-05-01 12:00:00	0.745718	0.54304	0.586445	0.896415	1	0.978162	0.975542	0.898343	0.990843	3	1
97	H	2023-05-01 12:00:00	0.691727	0.585437	0.56506	0.878007	0.973691	0.969032	0.930439	0.84549	0.990329	3	1
98	J	2023-05-01 12:00:00	0.875181	0.711869	0.540367	0.892017	1	0.972278	0.976947	0.930307	0.98976	3	1
99	K	2023-05-01 12:00:00	0.785196	0.672059	0.584672	0.851704	0.98255	0.959114	0.972192	0.908639	0.981396	4	1
100	H	2023-05-01 12:00:00	0.723657	0.586269	0.714319	0.914603	0.987459	0.978496	0.951686	0.813056	0.995136	3	1
101	L	2023-05-01 12:00:00	0.713208	0.489659	0.512602	0.973389	1	0.99545	0.984691	0.92809	0.996325	1	1
102	F	2023-05-01 12:00:00	0.708273	0.655429	0.56569	0.925753	1	0.994237	0.967757	0.925654	0.99931	2	1
103	M	2023-05-01 12:00:00	0.716401	0.516078	0.575142	0.878667	0.996303	0.973916	0.99362	0.807826	0.987703	4	1
104	N	2023-05-01 12:00:00	0.803774	0.775039	0.630277	0.877106	0.971887	0.970852	0.939829	0.93039	0.988618	3	1
105	O	2023-05-01 12:00:00	0.812482	0.685088	0.552969	0.87064	0.97446	0.983834	0.950643	0.935802	0.988657	4	1
106	N	2023-05-01 12:00:00	0.976401	0.66265	0.821558	0.949549	0.986542	0.969063	0.973937	0.882917	0.999274	4	1
107	P	2023-05-01 12:00:00	0.853411	0.630802	0.578804	0.911942	1	0.991932	0.973115	0.909419	0.999717	3	1
108	Q	2023-05-01 12:00:00	0.817707	0.670376	0.497401	0.929162	1	0.994935	0.97811	0.951121	0.999451	2	1
109	H	2023-05-01 12:00:00	0.688824	0.514087	0.54529	0.891093	1	0.962906	0.942096	0.789004	0.995857	3	1
110	R	2023-05-01 12:00:00	0.673585	0.592078	0.418478	0.884253	0.986927	0.977222	0.972673	0.767085	0.99902	3	1
111	S	2023-05-01 12:00:00	0.752685	0.399363	0.276662		0.849793	0.950167	0.898959	0.631246	0.997683	7	0
112	T	2023-05-01 12:00:00	0.784906	0.56403	0.577505	0.958214	1	0.995147	0.945507	0.847621	0.996271	2	1
113	I	2023-05-01 12:00:00	0.835123	0.649222	0.734326	0.687926	1	0.983743	0.985955	0.900117	0.997801	5	1
114	A	2023-05-01 16:00:00	0.702758	0.680926	0.633113	0.873367	0.992739	0.976008	0.983146	0.860847	0.990157	4	1
115	B	2023-05-01 16:00:00	0.675181	0.504678	0.594794	0.878843	1	0.969973	0.972533	0.881616	0.994485	3	1
116	C	2023-05-01 16:00:00	0.869086	0.672656	0.596133	0.931823	0.997663	0.986533	0.967677	0.898419	0.999579	3	1
117	D	2023-05-01 16:00:00	0.739013	0.603659	0.52745	0.847504	0.999261	0.96694	0.98742	0.945235	0.990673	4	1
118	E	2023-05-01 16:00:00	0.735269	0.584659	0.539946	0.924456	1	0.997847	0.995365	0.95332	0.995656	2	1
119	F	2023-05-01 16:00:00	0.703048	0.480611	0.484838	0.799692	1	0.989748	0.982524	0.930223	0.998382	4	1
120	G	2023-05-01 16:00:00	0.65283	0.544849	0.558325	0.94018	1	0.985441	0.961156	0.874782	0.998498	2	1
121	H	2023-05-01 16:00:00	0.755646	0.407868	0.653828	0.882824	1	0.976645	0.962962	0.837881	0.994044	3	1
122	G	2023-05-01 16:00:00	0.701974	0.418725	0.485547	0.885947	0.985507	0.969973	0.958287	0.559796	0.996612	3	1
123	I	2023-05-01 16:00:00	0.858345	0.632068	0.526701	0.629646	1	0.977252	0.990149	0.932837	0.996754	6	1
124	H	2023-05-01 16:00:00	0.676923	0.562293	0.621259	0.928854	0.980878	0.978344	0.953011	0.825282	0.996987	2	1
125	J	2023-05-01 16:00:00	0.734107	0.542497	0.590462	0.907192	1	0.977555	0.969322	0.898819	0.991114	3	1
126	H	2023-05-01 16:00:00	0.669086	0.567269	0.553206	0.905388	0.971695	0.971034	0.931763	0.847249	0.991909	3	1
127	J	2023-05-01 16:00:00	0.853701	0.711869	0.539698	0.899054	1	0.972915	0.975944	0.931434	0.989454	3	1
128	K	2023-05-01 16:00:00	0.763425	0.67785	0.586011	0.852738	0.982697	0.955839	0.972593	0.910992	0.978134	4	1
129	H	2023-05-01 16:00:00	0.712337	0.580244	0.712728	0.914251	0.987223	0.978101	0.951325	0.809315	0.995185	3	1
130	L	2023-05-01 16:00:00	0.672569	0.457811	0.511815	0.967011	1	0.994844	0.985193	0.927819	0.995834	2	1
131	F	2023-05-01 16:00:00	0.666183	0.60203	0.552064	0.924038	1	0.994359	0.968781	0.928022	0.999272	2	1
132	M	2023-05-01 16:00:00	0.722496	0.530373	0.595463	0.892545	0.99719	0.976645	0.995666	0.807928	0.988785	4	1
133	N	2023-05-01 16:00:00	0.777358	0.778496	0.639256	0.871872	0.970112	0.972035	0.94015	0.933163	0.990496	4	1
134	O	2023-05-01 16:00:00	0.784035	0.668078	0.55805	0.869364	0.970941	0.983591	0.949339	0.938102	0.990968	4	1
135	N	2023-05-01 16:00:00	0.967054	0.659211	0.823173	0.949175	0.986247	0.970579	0.974037	0.884351	0.999293	4	1
136	P	2023-05-01 16:00:00	0.851669	0.623564	0.57652	0.911678	1	0.992084	0.972633	0.909351	0.999729	3	1
137	Q	2023-05-01 16:00:00	0.817126	0.73143	0.529734	0.931427	1	0.995026	0.97809	0.951117	0.999436	2	1
138	H	2023-05-01 16:00:00	0.677213	0.506849	0.544896	0.901803	1	0.960601	0.941474	0.780615	0.995724	3	1
139	R	2023-05-01 16:00:00	0.621887	0.546062	0.369132	0.859666	0.990314	0.977313	0.96541	0.775068	0.998302	4	1
140	S	2023-05-01 16:00:00	0.756459	0.413477	0.294857	0.826589	0.845238	0.947437	0.897153	0.628926	0.997599	4	1
141	T	2023-05-01 16:00:00	0.782003	0.566202	0.574551	0.955025	1	0.994844	0.945487	0.847209	0.996095	2	1
142	I	2023-05-01 16:00:00	0.833091	0.649243	0.727237	0.690785	1	0.985047	0.98738	0.9008	0.997804	5	1
143	A	2023-05-01 20:00:00	0.703048	0.678935	0.627993	0.874438	0.993227	0.976069	0.982482	0.859697	0.990662	3	1
144	B	2023-05-01 20:00:00	0.70566	0.590449	0.634176	0.863163	1	0.974219	0.972773	0.880826	0.995637	4	0
145	C	2023-05-01 20:00:00	0.865893	0.672349	0.59696	0.936332	0.996865	1	0.965611	0.897763	0.999577	2	1
146	D	2023-05-01 20:00:00	0.776401	0.606192	0.532963	0.849043	0.998521	0.966636	0.986999	0.944617	0.990943	4	1
147	E	2023-05-01 20:00:00	0.748911	0.589906	0.558534	0.932571	1	0.99812	0.996449	0.953119	0.997031	2	1
148	F	2023-05-01 20:00:00	0.730044	0.509382	0.517328	0.791951	1	0.990082	0.982524	0.930449	0.998415	4	1
149	G	2023-05-01 20:00:00	0.613353	0.499611	0.549189	0.939081	1	0.985745	0.959592	0.868423	0.998556	2	1
150	H	2023-05-01 20:00:00	0.767228	0.418363	0.65883	0.891159	1	0.974522	0.962059	0.837049	0.994524	3	1
151	G	2023-05-01 20:00:00	0.713846	0.419992	0.495471	0.879327	0.980775	0.966636	0.958187	0.544029	0.995781	3	1
152	I	2023-05-01 20:00:00	0.870827	0.630621	0.531545	0.639762	1	0.981802	0.988062	0.932898	0.996583	6	1
153	H	2023-05-01 20:00:00	0.680406	0.56622	0.626591	0.92428	0.979266	0.974249	0.953051	0.826479	0.995901	2	1
154	J	2023-05-01 20:00:00	0.749782	0.544849	0.589241	0.913569	1	0.977859	0.973074	0.898313	0.991259	3	1
155	H	2023-05-01 20:00:00	0.703338	0.564374	0.551355	0.913789	0.978128	0.973794	0.935214	0.844543	0.992815	3	1
156	J	2023-05-01 20:00:00	0.856023	0.703545	0.543242	0.892017	1	0.972945	0.975422	0.92973	0.989815	3	1
157	K	2023-05-01 20:00:00	0.774746	0.68165	0.590974	0.846888	0.981958	0.957749	0.973375	0.910741	0.980732	4	1
158	H	2023-05-01 20:00:00	0.713498	0.579248	0.708503	0.912118	0.989781	0.978647	0.950282	0.805204	0.995311	3	1
159	L	2023-05-01 20:00:00	0.698694	0.453468	0.541745	0.97031	1	0.995147	0.984511	0.927075	0.996301	2	1
160	F	2023-05-01 20:00:00	0.680406	0.615747	0.578411	0.932923	1	0.994116	0.969964	0.926128	0.999245	2	1
161	M	2023-05-01 20:00:00	0.719303	0.517344	0.582585	0.900286	0.997634	0.978162	0.99691	0.80731	0.990527	4	1
162	N	2023-05-01 20:00:00	0.791001	0.783617	0.653552	0.869079	0.969403	0.971004	0.938504	0.933975	0.991357	4	1
163	O	2023-05-01 20:00:00	0.8	0.67405	0.569628	0.869672	0.971591	0.983136	0.947593	0.939184	0.992641	4	1
164	N	2023-05-01 20:00:00	0.931959	0.643107	0.768155	0.947746	0.98669	0.971489	0.970847	0.899424	0.999036	2	1
165	P	2023-05-01 20:00:00	0.863861	0.628268	0.582034	0.911304	1	0.99178	0.973837	0.909013	0.999712	3	1
166	Q	2023-05-01 20:00:00	0.82119	0.743735	0.535484	0.934264	1	0.994692	0.978592	0.95098	0.999501	2	1
167	H	2023-05-01 20:00:00	0.69492	0.502687	0.55041	0.896349	1	0.960601	0.941133	0.7796	0.995704	3	1
168	R	2023-05-01 20:00:00	0.626328	0.553209	0.424386	0.868199	0.994366	0.976281	0.965851	0.775812	0.999136	4	1
169	S	2023-05-01 20:00:00	0.764006	0.442068	0.350622	0.831207	0.846007	0.947073	0.896671	0.626193	0.997612	4	1
170	T	2023-05-01 20:00:00	0.784906	0.565116	0.570376	0.954366	1	0.994844	0.945326	0.847263	0.995911	2	1
171	I	2023-05-01 20:00:00	0.835414	0.652878	0.728025	0.688366	1	0.98438	0.987581	0.900875	0.997827	5	1
172	A	2023-05-02	0.703048	0.678392	0.628387	0.874438	0.993227	0.976069	0.982482	0.85875	0.990781	3	1
173	B	2023-05-02	0.75791	0.639668	0.654222	0.863163	1	0.974219	0.972773	0.878638	0.995856	4	0
174	C	2023-05-02	0.869666	0.674755	0.596723	0.936332	0.996865	1	0.965611	0.897025	0.999586	2	1
175	D	2023-05-02	0.788679	0.60764	0.533869	0.849043	0.998521	0.966636	0.986999	0.944679	0.990383	4	1
176	E	2023-05-02	0.770392	0.655592	0.589067	0.932571	1	0.99812	0.996449	0.952779	0.996762	2	1
177	F	2023-05-02	0.745428	0.565478	0.55163	0.791951	1	0.990082	0.982524	0.930819	0.998419	4	1
178	G	2023-05-02	0.635414	0.543402	0.58227	0.939081	1	0.985745	0.959592	0.868897	0.998463	2	1
179	H	2023-05-02	0.773585	0.442792	0.673559	0.891159	1	0.974522	0.962059	0.836172	0.994585	3	1
180	G	2023-05-02	0.731234	0.430849	0.523039	0.879327	0.980775	0.966636	0.958187	0.537322	0.997531	3	1
181	I	2023-05-02	0.870827	0.633697	0.534853	0.639762	1	0.981802	0.988062	0.93276	0.996768	6	1
182	H	2023-05-02	0.699565	0.568084	0.624709	0.92428	0.979266	0.974249	0.953051	0.826001	0.997076	2	1
183	J	2023-05-02	0.756749	0.546478	0.594124	0.913569	1	0.977859	0.973074	0.898545	0.991344	3	1
184	H	2023-05-02	0.718433	0.579864	0.570376	0.913789	0.978128	0.973794	0.935214	0.842784	0.993204	3	1
185	J	2023-05-02	0.870827	0.699202	0.546708	0.899274	1	0.970549	0.975883	0.927837	0.989746	3	1
186	K	2023-05-02	0.785486	0.68364	0.594794	0.849615	0.980775	0.95869	0.973295	0.910393	0.982384	4	1
187	H	2023-05-02	0.714949	0.57724	0.711701	0.912118	0.989781	0.978647	0.950282	0.802785	0.995506	3	1
188	L	2023-05-02	0.721916	0.486039	0.573645	0.97031	1	0.995147	0.984511	0.926737	0.995577	2	1
189	F	2023-05-02	0.707692	0.626495	0.592825	0.932923	1	0.994116	0.969964	0.926534	0.999189	2	1
190	M	2023-05-02	0.72627	0.515354	0.586326	0.904684	0.997486	0.979375	0.99693	0.807148	0.990603	4	1
191	N	2023-05-02	0.806676	0.784757	0.653631	0.869079	0.969403	0.971004	0.938504	0.934246	0.991815	4	1
192	O	2023-05-02	0.814224	0.689611	0.57077	0.873829	0.977492	0.98259	0.94641	0.939928	0.993263	3	1
193	N	2023-05-02	0.913062	0.633335	0.616178	0.947746	0.98669	0.971489	0.970847	0.903484	0.998152	2	1
194	P	2023-05-02	0.867344	0.629897	0.58294	0.911304	1	0.99178	0.973837	0.908878	0.999728	3	1
195	Q	2023-05-02	0.824673	0.724572	0.524181	0.934264	1	0.994692	0.978592	0.950913	0.999481	2	1
196	H	2023-05-02	0.702758	0.49563	0.552379	0.896503	1	0.962178	0.942698	0.771956	0.996139	3	1
197	R	2023-05-02	0.645051	0.581474	0.499724	0.868199	0.994366	0.976281	0.965851	0.775677	0.999274	4	1
198	S	2023-05-02	0.756749	0.44822	0.403631	0.831207	0.846007	0.947073	0.896671	0.629244	0.997583	4	1
199	T	2023-05-02	0.78984	0.570183	0.571322	0.954366	1	0.994844	0.945326	0.847337	0.99596	2	1
200	I	2023-05-02	0.83135	0.651092	0.73472	0.688366	1	0.98438	0.987581	0.901409	0.997835	5	1
201	A	2023-05-02 04:00:00	0.718723	0.680021	0.628781	0.872784	0.993478	0.976615	0.982639	0.8576	0.991178	4	1
202	B	2023-05-02 04:00:00	0.786067	0.651611	0.653552	0.900528	1	0.974219	0.975001	0.879067	0.996279	3	1
203	C	2023-05-02 04:00:00	0.87402	0.674158	0.597196	0.94559	0.997338		0.963624	0.897945	0.999578	7	0
204	D	2023-05-02 04:00:00	0.80389	0.60764	0.530246					0.943775	0.990473	7	0
205	E	2023-05-02 04:00:00	0.786357	0.680564	0.606124	0.926875	1	0.997756	0.994482	0.952572	0.997108	2	1
206	F	2023-05-02 04:00:00	0.765167	0.62103	0.58802	0.779547	1	0.989809	0.982946	0.931568	0.998448	5	1
207	G	2023-05-02 04:00:00	0.650218	0.590087	0.603379	0.936442	1	0.985138	0.960274	0.871535	0.998194	2	1
208	H	2023-05-02 04:00:00	0.775675	0.45582	0.678836	0.903937	1	0.976039	0.962019	0.835962	0.995548	3	1
209	G	2023-05-02 04:00:00	0.73672	0.423973	0.512642	0.884737	0.980627	0.96785	0.958067	0.545084	0.997615	3	1
210	I	2023-05-02 04:00:00	0.871408	0.634602	0.533396	0.634044	1	0.983015	0.988202	0.932289	0.996721	6	1
211	H	2023-05-02 04:00:00	0.695501	0.572245	0.632557	0.926545	0.98076	0.980315	0.946309	0.827064	0.997448	2	1
212	J	2023-05-02 04:00:00	0.756749	0.546478	0.595109	0.909171	1	0.977555	0.973315	0.89861	0.991211	3	1
213	H	2023-05-02 04:00:00	0.710885	0.574851	0.585302	0.918078	0.989678	0.97431	0.932726	0.841093	0.993431	2	1
214	J	2023-05-02 04:00:00	0.891727	0.699564	0.54781	0.893996	1	0.973279	0.976124	0.928856	0.989976	3	1
215	K	2023-05-02 04:00:00	0.786647	0.684002	0.594439	0.843787	0.978852	0.959236	0.972974	0.909417	0.983619	4	1
216	H	2023-05-02 04:00:00	0.720755	0.578905	0.716596	0.907389	0.990861	0.978556	0.953352	0.799805	0.995429	3	1
217	L	2023-05-02 04:00:00	0.739332	0.51843	0.591367	0.972509	1	0.995147	0.984511	0.926399	0.996138	2	1
218	N	2023-05-02 04:00:00	0.791872	0.597416	0.620156	0.833319	0.960012	0.948135	0.934171	0.892452	0.982287	4	1
219	F	2023-05-02 04:00:00	0.730624	0.656624	0.613106	0.921399	0.999482	0.9936	0.97482	0.924978	0.99916	2	1
220	M	2023-05-02 04:00:00	0.733237	0.519335	0.591052	0.904794	0.997634	0.979072	0.990289	0.80711	0.991082	4	1
221	N	2023-05-02 04:00:00	0.809289	0.782857	0.658081	0.864988	0.975836	0.970337	0.937461	0.932893	0.991666	4	1
222	O	2023-05-02 04:00:00	0.815094	0.69305	0.573133	0.880383	0.979503	0.981074	0.946369	0.937696	0.993516	3	1
223	N	2023-05-02 04:00:00	0.924296	0.646002	0.650008	0.938025	0.986247	0.971793	0.967015	0.894728	0.998661	2	1
224	P	2023-05-02 04:00:00	0.869376	0.627907	0.582073	0.914581	1	0.992023	0.973937	0.908675	0.999743	3	1
225	Q	2023-05-02 04:00:00	0.82119	0.704685	0.514965	0.930899	1	0.994601	0.976826	0.950866	0.999478	2	1
226	H	2023-05-02 04:00:00	0.706531	0.496897	0.557105	0.890719	1	0.962269	0.942557	0.776827	0.996068	3	1
227	R	2023-05-02 04:00:00	0.678433	0.622677	0.562146	0.897537	0.990846	0.979739	0.973897	0.77358	0.999319	3	1
228	S	2023-05-02 04:00:00	0.757039	0.436096	0.371101	0.833781	0.838332	0.944131	0.895147	0.626044	0.99743	4	1
229	T	2023-05-02 04:00:00	0.78926	0.573621	0.576796	0.966835	1	0.995147	0.948115	0.847594	0.995972	2	1
230	I	2023-05-02 04:00:00	0.825254	0.652952	0.712272	0.688806	1	0.984744	0.987621	0.901355	0.997805	5	1
231	A	2023-05-02 08:00:00	0.721335	0.680021	0.630356	0.864909	0.992857	0.97519	0.982952	0.852526	0.990614	4	1
232	B	2023-05-02 08:00:00	0.770392	0.632973	0.628505	0.890851	1	0.973309	0.974238	0.880819	0.996579	3	1
233	C	2023-05-02 08:00:00	0.87402	0.672349	0.595896	0.927271	0.997974		0.964367	0.898622	0.999583	7	0
234	D	2023-05-02 08:00:00	0.740726	0.603297	0.532018	0.852232	0.998225	0.968153	0.985895	0.943834	0.992049	4	1
235	E	2023-05-02 08:00:00	0.797097	0.682373	0.608314	0.942819	1	0.997483	0.995225	0.952395	0.996945	2	1
236	F	2023-05-02 08:00:00	0.755878	0.608907	0.561515	0.772509	1	0.989748	0.982785	0.930993	0.996131	5	1
237	G	2023-05-02 08:00:00	0.642961	0.584478	0.602394	0.937761	1	0.985745	0.960113	0.87255	0.998346	2	1
238	H	2023-05-02 08:00:00	0.765022	0.433563	0.663989	0.896129	1	0.977555	0.964266	0.83649	0.995587	3	1
239	G	2023-05-02 08:00:00	0.720784	0.420354	0.514414	0.871564	0.975303	0.962693	0.954656	0.543966	0.995941	4	1
240	I	2023-05-02 08:00:00	0.849927	0.629354	0.533475	0.634044	1	0.983015	0.989266	0.932576	0.996684	6	1
241	H	2023-05-02 08:00:00	0.692308	0.572209	0.632219	0.932153	0.981056	0.980437	0.953974	0.827582	0.997439	2	1
242	J	2023-05-02 08:00:00	0.730334	0.541592	0.59952	0.905212	1	0.977252	0.971128	0.902387	0.990957	3	1
243	H	2023-05-02 08:00:00	0.680406	0.555761	0.577308	0.916692	0.99302	0.973764	0.935615	0.842108	0.993415	3	1
244	J	2023-05-02 08:00:00	0.883309	0.696669	0.544384	0.902793	1	0.973612	0.976305	0.928794	0.990106	3	1
245	K	2023-05-02 08:00:00	0.756168	0.681831	0.58798	0.843699	0.976782	0.960449	0.971229	0.909877	0.984691	4	1
246	H	2023-05-02 08:00:00	0.716691	0.572227	0.710905	0.91159	0.990787	0.977313	0.94639	0.797805	0.995391	3	1
247	L	2023-05-02 08:00:00	0.742235	0.544306	0.584279	0.965252	1	0.995147	0.98435	0.926399	0.99657	2	1
248	N	2023-05-02 08:00:00	0.785776	0.603369	0.619093	0.838201	0.960944	0.952715	0.935976	0.89468	0.987739	4	1
249	F	2023-05-02 08:00:00	0.71553	0.582035	0.588296	0.91876	0.999527	0.993449	0.974559	0.928157	0.999093	2	1
250	M	2023-05-02 08:00:00	0.728012	0.511916	0.580773	0.903321	0.998077	0.979072	0.996529	0.807452	0.99141	4	1
251	N	2023-05-02 08:00:00	0.787808	0.780468	0.654497	0.867913	0.980139	0.973006	0.938846	0.930999	0.992975	4	1
252	O	2023-05-02 08:00:00	0.783745	0.687983	0.567856	0.877634	0.983156	0.981923	0.94352	0.937019	0.994474	3	1
253	N	2023-05-02 08:00:00	0.942032	0.655411	0.706797	0.938025	0.986395	0.970579	0.96864	0.889796	0.998862	3	1
254	P	2023-05-02 08:00:00	0.849927	0.63044	0.579395	0.90695	1	0.991871	0.974098	0.909622	0.999733	3	1
255	Q	2023-05-02 08:00:00	0.816546	0.696759	0.507601	0.924522	1	0.994995	0.978532	0.951007	0.999443	2	1
256	H	2023-05-02 08:00:00	0.693469	0.506668	0.551985	0.890719	1	0.958417	0.939086	0.796783	0.99475	3	1
257	R	2023-05-02 08:00:00	0.682351	0.616452	0.524102	0.894986	0.989515	0.979345	0.97478	0.775677	0.999247	3	1
258	S	2023-05-02 08:00:00	0.757039	0.437182	0.375748	0.825929	0.839042	0.939581	0.893662	0.625022	0.997093	4	1
259	T	2023-05-02 08:00:00	0.790421	0.573078	0.577465	0.950891	1	0.994844		0.847662	0.995987	2	0
260	I	2023-05-02 08:00:00	0.83106	0.653634	0.727631	0.689246	1	0.985077	0.987179	0.901835	0.997811	5	1
261	A	2023-05-02 12:00:00	0.707112	0.67423	0.626812	0.864812	0.99018	0.974765	0.982298	0.850023	0.990265	4	1
262	B	2023-05-02 12:00:00	0.69463	0.556792	0.581837	0.900572	1	0.975432	0.972733	0.882465	0.996393	3	1
263	C	2023-05-02 12:00:00	0.869666	0.671462	0.59503	0.929096	0.998506		0.966674	0.899014	0.999574	7	0
264	D	2023-05-02 12:00:00	0.662642	0.594611	0.550725	0.845569	0.99793	0.964816	0.987621	0.943573	0.988749	4	1
265	E	2023-05-02 12:00:00	0.770392	0.645459	0.579568	0.923598	1	0.997574	0.995024	0.952956	0.996699	2	1
266	F	2023-05-02 12:00:00	0.69521	0.516621	0.510673	0.764262	1	0.989506	0.981401	0.931091	0.997084	5	1
267	G	2023-05-02 12:00:00	0.602322	0.52784	0.572031	0.931823	1	0.984835	0.96529	0.88175	0.998159	2	1
268	H	2023-05-02 12:00:00	0.72836	0.414382	0.664422	0.880713	1	0.973612	0.962782	0.836888	0.99261	3	1
269	G	2023-05-02 12:00:00	0.701771	0.424154	0.524732	0.868595	0.957853	0.961783	0.951787	0.534539	0.996599	4	1
270	I	2023-05-02 12:00:00	0.82119	0.624468	0.531782	0.629646	1	0.982408	0.989125	0.932354	0.996533	6	1
271	H	2023-05-02 12:00:00	0.676923	0.56546	0.627009	0.926875	0.98181	0.976949	0.955699	0.826263	0.996471	2	1
272	J	2023-05-02 12:00:00	0.734107	0.544668	0.600898	0.902573	1	0.975736	0.972172	0.899802	0.989364	3	1
273	H	2023-05-02 12:00:00	0.646444	0.505275	0.549228	0.911216	0.997116	0.974492	0.936879	0.84062	0.993937	3	1
274	J	2023-05-02 12:00:00	0.845864	0.685631	0.54017	0.901034	1	0.971914	0.975141	0.927235	0.989587	3	1
275	K	2023-05-02 12:00:00	0.712337	0.676945	0.586799	0.844315	0.974564	0.962056	0.969804	0.909921	0.985863	4	1
276	H	2023-05-02 12:00:00	0.707692	0.56622	0.708719	0.907873	0.990328	0.977009	0.945065	0.796309	0.995314	3	1
277	L	2023-05-02 12:00:00	0.689985	0.513363	0.55041	0.967011	1	0.994844	0.983969	0.92694	0.996126	2	1
278	N	2023-05-02 12:00:00	0.748331	0.604057	0.613028	0.833846	0.963576	0.954231	0.936338	0.896705	0.988376	4	1
279	F	2023-05-02 12:00:00	0.577358	0.629481	0.650047	0.918012	0.999615	0.992781	0.973797	0.92924	0.999862	2	1
280	M	2023-05-02 12:00:00	0.69434	0.499068	0.566044	0.903761	0.998373	0.979982	0.989607	0.80845	0.991738	4	1
281	N	2023-05-02 12:00:00	0.734107	0.770172	0.64414	0.86943	0.984502	0.975159	0.942597	0.933028	0.993291	4	1
282	O	2023-05-02 12:00:00	0.73643	0.682011	0.564312	0.879415	0.987873	0.984258	0.945607	0.939117	0.994374	3	1
283	N	2023-05-02 12:00:00	0.960029	0.663192	0.763981	0.938025	0.985359	0.969366	0.96864	0.882434	0.999062	3	1
284	P	2023-05-02 12:00:00	0.846444	0.62284	0.575417	0.910117	1	0.991507	0.973817	0.909486	0.993859	3	1
285	Q	2023-05-02 12:00:00	0.808999	0.704341	0.513469	0.929404	1	0.995208	0.977428	0.951302	0.999492	2	1
286	H	2023-05-02 12:00:00	0.676052	0.520421	0.557498	0.896591	1	0.957537	0.937321	0.800369	0.993839	3	1
287	R	2023-05-02 12:00:00	0.638607	0.584985	0.504411	0.880713	0.986528	0.979497	0.972713	0.78278	0.99911	3	1
288	S	2023-05-02 12:00:00	0.753266	0.436277	0.389453	0.821311	0.851227	0.938277	0.898357	0.62649	0.995687	4	1
289	T	2023-05-02 12:00:00	0.782583	0.571087	0.577623	0.954256	1	0.994844	0.946269	0.847588	0.995929	2	1
290	I	2023-05-02 12:00:00	0.823222	0.652965	0.73275	0.680888	1	0.985199	0.986898	0.902498	0.997803	5	1
291	A	2023-05-02 16:00:00	0.697823	0.671697	0.619329	0.870743	0.991718	0.974644	0.980632	0.845896	0.989877	4	1
292	B	2023-05-02 16:00:00	0.66357	0.530011	0.591328	0.90033	1	0.975129	0.972232	0.883876	0.996204	3	1
293	C	2023-05-02 16:00:00	0.869086	0.67025	0.593415	0.934902	0.99861		0.964587	0.901199	0.999579	7	0
294	D	2023-05-02 16:00:00	0.677823	0.589725	0.552024	0.846668	0.998373	0.96512	0.98732	0.943616	0.990259	4	1
295	E	2023-05-02 16:00:00	0.734978	0.59443	0.563579	0.926193	1	0.997422	0.995205	0.953487	0.995759	2	1
296	F	2023-05-02 16:00:00	0.673149	0.467582	0.508073	0.757884	1	0.988899	0.981541	0.932116	0.99662	5	1
297	G	2023-05-02 16:00:00	0.561974	0.426687	0.574236	0.923466	0.997486	0.983318	0.96854	0.88865	0.997703	2	1
298	H	2023-05-02 16:00:00	0.71672	0.412935	0.67541	0.876028	1	0.972399	0.961959	0.836719	0.992895	3	1
299	G	2023-05-02 16:00:00	0.693585	0.420896	0.530876	0.861007	0.951642	0.957234	0.9497	0.525909	0.995171	4	1
300	I	2023-05-02 16:00:00	0.813353	0.615602	0.526189	0.630306	0.999408	0.981498	0.98736	0.931846	0.996277	6	1
301	H	2023-05-02 16:00:00	0.669376	0.563071	0.625918	0.921025	0.981426	0.971762	0.952128	0.826725	0.995035	2	1
302	H	2023-05-02 16:00:00	0.633962	0.474875	0.530521	0.909237	0.99549	0.974219	0.935535	0.84292	0.994242	3	1
303	J	2023-05-02 16:00:00	0.808999	0.683097	0.546826	0.902573	1	0.973703	0.975582	0.927074	0.988829	3	1
304	K	2023-05-02 16:00:00	0.702467	0.675316	0.588886	0.88234	0.971606	0.963118	0.967637	0.907918	0.986295	3	1
305	H	2023-05-02 16:00:00	0.703628	0.559199	0.71198	0.906268	0.993789	0.977464	0.951827	0.794538	0.995161	3	1
306	L	2023-05-02 16:00:00	0.672569	0.497801	0.555923	0.97009	1	0.99454	0.983849	0.92694	0.996325	2	1
307	N	2023-05-02 16:00:00	0.731785	0.605106	0.608105	0.832307	0.964833	0.956385	0.933689	0.898098	0.988546	4	1
308	F	2023-05-02 16:00:00	0.647315	0.573983	0.579238	0.916934	0.999941	0.993358	0.975883	0.927955	0.99926	3	1
309	M	2023-05-02 16:00:00	0.672279	0.493459	0.571637	0.913569	0.999113	0.979072	0.997612	0.807526	0.991678	4	1
310	N	2023-05-02 16:00:00	0.722496	0.768	0.642722	0.856741	0.987371	0.978071	0.941895	0.934719	0.994477	4	1
311	O	2023-05-02 16:00:00	0.729753	0.677669	0.569668	0.882648	0.989411	0.985502	0.94647	0.940267	0.995458	3	1
312	N	2023-05-02 16:00:00	0.94598	0.65523	0.755356	0.958896	0.984324	0.971793	0.96864	0.888811	0.99908	2	1
313	P	2023-05-02 16:00:00	0.854282	0.631526	0.578371	0.903937	1	0.989506	0.973556	0.909486	0.994039	3	1
314	Q	2023-05-02 16:00:00	0.813062	0.737202	0.535444	0.934748	1	0.995147	0.978652	0.95125	0.999473	2	1
315	H	2023-05-02 16:00:00	0.664441	0.56584	0.56695	0.857994	0.998669	0.947649	0.922955	0.834802	0.988356	4	1
316	R	2023-05-02 16:00:00	0.60865	0.574616	0.549307	0.866571	0.984369	0.979254	0.97163	0.787515	0.999357	4	1
317	S	2023-05-02 16:00:00	0.738752	0.430849	0.401032	0.814405	0.838347	0.932818	0.8931	0.624657	0.993901	4	1
318	T	2023-05-02 16:00:00	0.779971	0.571449	0.574827	0.954541	1	0.995147	0.947814	0.847276	0.996045	2	1
319	I	2023-05-02 16:00:00	0.827576	0.65258	0.748503	0.663514	1	0.978526	0.985333	0.903675	0.994531	6	1
320	A	2023-05-02 20:00:00	0.687954	0.672421	0.622086	0.860339	0.987474	0.972308	0.975043	0.834734	0.987203	4	1
321	B	2023-05-02 20:00:00	0.699855	0.60764	0.634924	0.894898	1	0.974826	0.970065	0.883684	0.9958	3	0
322	C	2023-05-02 20:00:00	0.865602	0.671751	0.592431	0.934704	0.998314	0.988141	0.964587	0.902735	0.999588	3	1
323	D	2023-05-02 20:00:00	0.699071	0.603297	0.558168	0.837079	0.998521	0.955414	0.987079	0.943838	0.982797	4	1
324	E	2023-05-02 20:00:00	0.743106	0.608726	0.574433	0.917462	1	0.997604	0.995506	0.953415	0.996556	3	1
325	F	2023-05-02 20:00:00	0.691437	0.533268	0.553245	0.749791	1	0.989627	0.981943	0.931348	0.997914	5	1
326	G	2023-05-02 20:00:00	0.591292	0.467039	0.595857	0.917968	1	0.983621	0.966975	0.887433	0.997692	2	1
327	H	2023-05-02 20:00:00	0.724151	0.428316	0.689627	0.885925	1	0.974522	0.961738	0.835795	0.99399	3	1
328	G	2023-05-02 20:00:00	0.692279	0.432477	0.55742	0.858676	0.968648	0.952684	0.953612	0.529772	0.991864	4	1
329	I	2023-05-02 20:00:00	0.817417	0.621573	0.529694	0.629866	1	0.979982	0.991694	0.931926	0.994895	6	1
330	H	2023-05-02 20:00:00	0.672859	0.56251	0.628789	0.921245	0.981647	0.97616	0.951847	0.826549	0.996615	2	1
331	J	2023-05-02 20:00:00	0.730334	0.547563	0.606923	0.879701	1	0.973916	0.976084	0.89879	0.987879	3	1
332	H	2023-05-02 20:00:00	0.646734	0.496082	0.556711	0.912866	0.997279	0.975493	0.934672	0.842243	0.994241	3	1
333	J	2023-05-02 20:00:00	0.845864	0.696669	0.545723	0.898614	1	0.971398	0.976606	0.929378	0.988707	3	1
334	K	2023-05-02 20:00:00	0.709144	0.673326	0.599362	0.854915	0.979296	0.963694	0.975001	0.905597	0.986156	4	1
335	H	2023-05-02 20:00:00	0.69434	0.560212	0.710263	0.905454	0.99336	0.976706	0.95273	0.794333	0.994371	3	1
336	L	2023-05-02 20:00:00	0.687083	0.49183	0.568919	0.968331	1	0.99454	0.983989	0.926737	0.996488	2	1
337	N	2023-05-02 20:00:00	0.734978	0.61001	0.625591	0.833209	0.966489	0.956961	0.937622	0.898505	0.989018	4	1
338	F	2023-05-02 20:00:00	0.654862	0.609793	0.610271	0.919331	0.999704	0.993358	0.97177	0.926804	0.999114	2	1
339	M	2023-05-02 20:00:00	0.685631	0.494001	0.582112	0.91082	0.998817	0.979982	0.999599	0.807082	0.991976	4	1
340	N	2023-05-02 20:00:00	0.735849	0.765648	0.655758	0.85828	0.986897	0.979375	0.939608	0.935193	0.994967	4	1
341	O	2023-05-02 20:00:00	0.739913	0.682735	0.581837	0.886145	0.991009	0.985502	0.946771	0.941011	0.995804	3	1
342	N	2023-05-02 20:00:00	0.934398	0.650164	0.750985	0.958896	1	0.973006	0.96864	0.891007	0.99911	2	1
343	P	2023-05-02 20:00:00	0.858926	0.62863	0.582979	0.909919	1	0.990537	0.973897	0.909351	0.997603	3	1
344	Q	2023-05-02 20:00:00	0.817126	0.751316	0.54462	0.93455	1	0.995541	0.977629	0.951177	0.999498	2	1
345	H	2023-05-02 20:00:00	0.671988	0.521687	0.565769	0.885441	1	0.95141	0.931944	0.796377	0.992084	3	1
346	R	2023-05-02 20:00:00	0.60328	0.582759	0.58995	0.879899	0.985078	0.978374	0.973155	0.784606	0.99974	3	1
347	T	2023-05-02 20:00:00	0.780552	0.569097	0.580104	0.953486	1	0.994844	0.945567	0.847601	0.995804	2	1
348	I	2023-05-02 20:00:00	0.819158	0.651553	0.753623	0.67539	1	0.983773	0.987902	0.903621	0.99756	6	1
349	A	2023-05-03	0.68447	0.671697	0.62563	0.860339	0.987474	0.972308	0.975043	0.833719	0.987713	4	1
350	B	2023-05-03	0.748041	0.648173	0.655679	0.894898	1	0.974826	0.970065	0.88326	0.995681	3	0
351	C	2023-05-03	0.865602	0.671154	0.58995	0.934704	0.998314	0.988141	0.964587	0.902356	0.999611	3	1
352	D	2023-05-03	0.718055	0.603659	0.557302	0.837079	0.998521	0.955414	0.987079	0.9431	0.987063	4	1
353	E	2023-05-03	0.758781	0.66084	0.603166	0.917462	1	0.997604	0.995506	0.953217	0.996853	3	1
354	F	2023-05-03	0.694049	0.576335	0.584239	0.749791	1	0.989627	0.981943	0.931057	0.998043	5	1
355	G	2023-05-03	0.608418	0.548287	0.617242	0.917968	1	0.983621	0.966975	0.886553	0.99761	2	1
356	H	2023-05-03	0.725051	0.456363	0.702111	0.885925	1	0.974522	0.961738	0.834718	0.995457	3	1
357	G	2023-05-03	0.704731	0.43483	0.559034	0.858676	0.968648	0.952684	0.953612	0.532765	0.996527	4	1
358	I	2023-05-03	0.817126	0.625554	0.535208	0.629866	1	0.979982	0.991694	0.932281	0.996632	6	1
359	H	2023-05-03	0.672859	0.559144	0.626855	0.921245	0.981647	0.97616	0.951847	0.826676	0.995135	2	1
360	J	2023-05-03	0.732946	0.542316	0.597432	0.879701	1	0.973916	0.976084	0.898966	0.987429	3	1
361	H	2023-05-03	0.659507	0.526754	0.577977	0.912866	0.997279	0.975493	0.934672	0.841296	0.993397	3	1
362	J	2023-05-03	0.879245	0.709516	0.549976	0.896855	1	0.972551	0.977388	0.930534	0.989457	3	1
363	K	2023-05-03	0.714369	0.67423	0.603497	0.854915	0.979296	0.963694	0.975001	0.903898	0.985345	4	1
364	H	2023-05-03	0.69434	0.567559	0.713106	0.905454	0.99336	0.976706	0.95273	0.792786	0.992758	3	1
365	L	2023-05-03	0.695791	0.514811	0.593336	0.968331	1	0.99454	0.983989	0.926872	0.99622	2	1
366	N	2023-05-03	0.737591	0.611404	0.633388	0.833209	0.966489	0.956961	0.937622	0.897473	0.989854	4	1
367	F	2023-05-03	0.669956	0.62977	0.624212	0.919331	0.999704	0.993358	0.97177	0.926669	0.998639	2	1
368	M	2023-05-03	0.696081	0.505401	0.595818	0.910776	0.998669	0.980892	0.996088	0.807213	0.992232	4	1
369	N	2023-05-03	0.74688	0.769973	0.66202	0.85828	0.986897	0.979375	0.939608	0.936817	0.994961	4	1
370	O	2023-05-03	0.751814	0.688707	0.585263	0.885991	0.990624	0.981043	0.94649	0.94189	0.995658	3	1
371	N	2023-05-03	0.956488	0.662288	0.779773	0.958896	1	0.973006	0.96864	0.883297	0.999189	3	1
372	P	2023-05-03	0.860668	0.630802	0.580222	0.909919	1	0.990537	0.973897	0.90908	0.999152	3	1
373	Q	2023-05-03	0.815094	0.739735	0.536704	0.93455	1	0.995541	0.977629	0.951203	0.999479	2	1
374	H	2023-05-03	0.677504	0.53924	0.566556	0.866461	0.998077	0.948893	0.928332	0.810854	0.99062	4	1
375	R	2023-05-03	0.609376	0.604093	0.627678	0.879899	0.985078	0.978374	0.973155	0.781089	0.999786	3	1
376	T	2023-05-03	0.781132	0.571811	0.574394	0.953486	1	0.994844	0.945567	0.84733	0.996091	2	1
377	I	2023-05-03	0.8209	0.650453	0.754411	0.67539	1	0.983773	0.987902	0.903621	0.997739	6	1
378	A	2023-05-03 04:00:00	0.688244	0.673326	0.631144	0.854797	0.988495	0.9734	0.973074	0.830811	0.988011	4	1
379	B	2023-05-03 04:00:00	0.770392	0.660297	0.653749	0.891159	1	0.974219	0.969844	0.883485	0.995562	3	1
380	C	2023-05-03 04:00:00	0.864441	0.670847	0.589792	0.937695	0.998447	0.988414	0.963945	0.902234	0.999599	3	1
381	D	2023-05-03 04:00:00	0.72984	0.606735	0.558562	0.844051	0.995711	0.962087	0.985634	0.942345	0.988885	4	1
382	E	2023-05-03 04:00:00	0.774456	0.681107	0.613733	0.915659	1	0.997422	0.996489	0.953007	0.996598	3	1
383	F	2023-05-03 04:00:00	0.701597	0.629897	0.616612	0.748889	1	0.989445	0.981441	0.930884	0.998029	5	1
384	G	2023-05-03 04:00:00	0.63164	0.588278	0.627796	0.915769	1	0.982712	0.966333	0.886892	0.997364	3	1
385	H	2023-05-03 04:00:00	0.727054	0.469211	0.706207	0.905102	1	0.977252	0.962441	0.834319	0.995389	3	1
386	G	2023-05-03 04:00:00	0.712743	0.44822	0.578411	0.873961	0.954451	0.962693	0.954094	0.539093	0.99605	3	1
387	I	2023-05-03 04:00:00	0.817126	0.625735	0.54021	0.632065	1	0.983318	0.988824	0.932358	0.996836	6	1
388	H	2023-05-03 04:00:00	0.668215	0.560773	0.634338	0.922894	0.980538	0.974189	0.947694	0.828927	0.995934	2	1
389	J	2023-05-03 04:00:00	0.737881	0.540144	0.597984	0.860787	1	0.974219	0.976044	0.89898	0.987974	4	1
390	H	2023-05-03 04:00:00	0.661829	0.541085	0.594557	0.913855	0.997604	0.972126	0.935354	0.843596	0.993765	3	1
391	J	2023-05-03 04:00:00	0.900435	0.716212	0.551394	0.887838	1	0.972308	0.976325	0.930291	0.988334	3	1
392	K	2023-05-03 04:00:00	0.714949	0.675859	0.608223	0.85177	0.974712	0.960267	0.967176	0.902661	0.984657	4	1
393	H	2023-05-03 04:00:00	0.69434	0.56926	0.715064	0.900418	0.992842	0.976069	0.950503	0.791003	0.993841	3	1
394	L	2023-05-03 04:00:00	0.710305	0.553354	0.609089	0.967891	1	0.994844	0.983608	0.926737	0.996406	2	1
395	N	2023-05-03 04:00:00	0.741074	0.61001	0.639217	0.833671	0.96609	0.95784	0.940089	0.896178	0.990328	4	1
396	F	2023-05-03 04:00:00	0.679245	0.647377	0.642486	0.920651	0.999187	0.993115	0.974399	0.923354	0.999128	2	1
397	M	2023-05-03 04:00:00	0.700435	0.508659	0.599283		0.998965	0.980892	0.993499	0.807027	0.99251	7	0
398	N	2023-05-03 04:00:00	0.752685	0.773085	0.663752	0.860194	0.987445	0.978678	0.939829	0.937087	0.99494	4	1
399	O	2023-05-03 04:00:00	0.755588	0.691602	0.587508	0.889532	0.989027	0.984926	0.946109	0.941687	0.99505	3	1
400	N	2023-05-03 04:00:00	0.960203	0.661745	0.79084	0.961227	0.987578	0.969669	0.96864	0.884633	0.999205	3	1
401	P	2023-05-03 04:00:00	0.849637	0.618135	0.573173	0.911634	1	0.991295	0.974017	0.909622	0.994523	3	1
402	Q	2023-05-03 04:00:00	0.813062	0.727449	0.527292	0.932879	1	0.994904	0.978472	0.951175	0.99954	2	1
403	H	2023-05-03 04:00:00	0.683309	0.525487	0.565375	0.891907	1	0.952017	0.930981	0.800639	0.992237	3	1
404	R	2023-05-03 04:00:00	0.629637	0.638655	0.641541	0.885727	0.992724	0.974462	0.975382	0.777436	0.999822	3	1
405	S	2023-05-03 04:00:00	0.73672	0.487487	0.530521	0.820123	0.821783	0.918016	0.887723	0.621566	0.993233	4	1
406	T	2023-05-03 04:00:00	0.781132	0.57163	0.574472	0.957181	1	0.995147	0.945607	0.846728	0.996246	2	1
407	I	2023-05-03 04:00:00	0.826996	0.650824	0.677221	0.670552	1	0.983167	0.986617	0.904189	0.997639	6	1
408	A	2023-05-03 08:00:00	0.676633	0.678392	0.637839	0.850519	0.987933	0.969275	0.973044	0.833855	0.980584	4	1
409	B	2023-05-03 08:00:00	0.764296	0.650345	0.634019	0.877766	0.999556	0.970579	0.969463	0.885257	0.995151	3	1
410	C	2023-05-03 08:00:00	0.861829	0.671751	0.591486	0.924786	0.998166	0.988444	0.962802	0.902336	0.999595	3	1
411	D	2023-05-03 08:00:00	0.689405	0.596783	0.55801	0.843083	0.996007	0.96057	0.986858	0.941505	0.988896	4	1
412	E	2023-05-03 08:00:00	0.785776	0.672602	0.602158	0.915175	0.998669	0.997179	0.994322	0.952932	0.99677	3	1
413	F	2023-05-03 08:00:00	0.690856	0.610535	0.590501	0.744975	1	0.990355	0.98116	0.93171	0.998274	5	1
414	G	2023-05-03 08:00:00	0.635414	0.597687	0.620944	0.91181	1	0.981195	0.967477	0.888786	0.997014	3	1
415	H	2023-05-03 08:00:00	0.717678	0.447858	0.691478	0.897009	1	0.975736	0.963042	0.834846	0.994378	3	1
416	G	2023-05-03 08:00:00	0.702612	0.448401	0.577741	0.869452	0.970719	0.95875	0.956421	0.528673	0.994938	4	1
417	I	2023-05-03 08:00:00	0.805515	0.619402	0.533514	0.626567	0.999704	0.983015	0.989747	0.93276	0.996553	6	1
418	H	2023-05-03 08:00:00	0.676633	0.559687	0.630356	0.92406	0.981573	0.976099	0.95285	0.828285	0.996547	2	1
419	J	2023-05-03 08:00:00	0.72656	0.539602	0.599874	0.866725	1	0.974826	0.975903	0.899474	0.988813	4	1
420	H	2023-05-03 08:00:00	0.642961	0.511282	0.578922	0.912316	0.999127	0.973127	0.936057	0.842379	0.994	3	1
421	J	2023-05-03 08:00:00	0.887954	0.711145	0.549346	0.897735	1	0.972793	0.976345	0.929349	0.989675	3	1
422	K	2023-05-03 08:00:00	0.697242	0.675678	0.609523	0.857642	0.974564	0.959842	0.966393	0.902875	0.984626	4	1
423	H	2023-05-03 08:00:00	0.685051	0.558565	0.711578	0.902727	0.992694	0.976918	0.948797	0.790354	0.994909	3	1
424	L	2023-05-03 08:00:00	0.719013	0.568011	0.598456	0.97185	1	0.994844	0.984069	0.926872	0.996862	2	1
425	N	2023-05-03 08:00:00	0.734688	0.608961	0.63457	0.838047	0.965454	0.959327	0.942618	0.896173	0.991585	4	1
426	F	2023-05-03 08:00:00	0.678955	0.637823	0.617557	0.923092	0.999556	0.993691	0.976886	0.923354	0.999306	2	1
427	M	2023-05-03 08:00:00	0.698113	0.505763	0.597984		0.998965	0.981498	0.99368	0.807141	0.99288	7	0
428	N	2023-05-03 08:00:00	0.734398	0.779817	0.66517	0.860194	0.985581	0.977859	0.941093	0.936343	0.994929	4	1
429	O	2023-05-03 08:00:00	0.730334	0.678031	0.581443	0.888784	0.98845	0.985229	0.945386	0.939996	0.995216	3	1
430	N	2023-05-03 08:00:00	0.960522	0.660659	0.802418	0.95839	0.986986	0.969669	0.96864	0.88562	0.999228	3	1
431	P	2023-05-03 08:00:00	0.838897	0.622116	0.570495	0.905124	1	0.991295	0.974298	0.90996	0.998326	3	1
432	Q	2023-05-03 08:00:00	0.808418	0.705789	0.51595	0.930943	1	0.995268	0.977609	0.951234	0.999529	2	1
433	H	2023-05-03 08:00:00	0.671698	0.498525	0.563406	0.885793	0.999261	0.952229	0.932224	0.781833	0.993302	3	1
434	R	2023-05-03 08:00:00	0.628766	0.618768	0.543281	0.880471	0.992325	0.975311	0.975883	0.776556	0.999783	3	1
435	S	2023-05-03 08:00:00	0.730914	0.494182	0.528474	0.821927	0.812925	0.918805	0.878835	0.624204	0.994395	4	1
436	T	2023-05-03 08:00:00	0.773004	0.560954	0.575457	0.958478	1	0.995147	0.948316	0.846532	0.996169	2	1
437	I	2023-05-03 08:00:00	0.824383	0.647548	0.731175	0.679569	1	0.984228	0.9873	0.9054	0.997784	5	1
438	A	2023-05-03 12:00:00	0.669086	0.679478	0.631537	0.854117	0.987873	0.967546	0.972338	0.835546	0.982228	4	1
439	B	2023-05-03 12:00:00	0.697242	0.606373	0.605151	0.88289	1	0.968759	0.965932	0.88728	0.995118	3	1
440	C	2023-05-03 12:00:00	0.856023	0.670557	0.588532	0.928436	0.997663	0.988565	0.963524	0.901639	0.999598	3	1
441	D	2023-05-03 12:00:00	0.618694	0.59624	0.568329	0.850011	0.995416	0.964816	0.986878	0.942661	0.990178	4	1
442	E	2023-05-03 12:00:00	0.739042	0.623745	0.574299	0.917594	0.999408	0.99727	0.994482	0.953609	0.996503	2	1
443	F	2023-05-03 12:00:00	0.627866	0.497982	0.529261	0.746382	1	0.989293	0.981441	0.932099	0.997396	5	1
444	G	2023-05-03 12:00:00	0.62061	0.58303	0.610547	0.902133	1	0.982408	0.966975	0.888583	0.997259	3	1
445	H	2023-05-03 12:00:00	0.688157	0.426325	0.688406	0.882296	1	0.972702	0.961799	0.835647	0.992544	3	1
446	G	2023-05-03 12:00:00	0.690682	0.45202	0.579828	0.878183	0.972493	0.963907	0.960274	0.528905	0.995971	3	1
447	I	2023-05-03 12:00:00	0.781132	0.615059	0.527883	0.631625	0.999852	0.982408	0.989045	0.933732	0.996491	6	1
448	H	2023-05-03 12:00:00	0.669086	0.558584	0.625721	0.926105	0.982002	0.978374	0.95273	0.826825	0.996971	2	1
449	J	2023-05-03 12:00:00	0.707112	0.540687	0.599638	0.863866	1	0.976039	0.973456	0.898376	0.989954	4	1
450	H	2023-05-03 12:00:00	0.598549	0.463601	0.556947	0.903629	0.998758	0.972157	0.935716	0.843664	0.99328	3	1
451	J	2023-05-03 12:00:00	0.858345	0.707164	0.540721	0.899934	1	0.9734	0.976345	0.929393	0.990076	3	1
452	K	2023-05-03 12:00:00	0.660087	0.668621	0.606018	0.862217	0.973529	0.958781	0.966714	0.905121	0.985078	4	1
453	H	2023-05-03 12:00:00	0.675181	0.557154	0.70816	0.900066	0.991556	0.976949	0.952168	0.790329	0.995093	3	1
454	L	2023-05-03 12:00:00	0.669666	0.511916	0.553954	0.978667	1	0.995147	0.984471	0.927819	0.997026	2	1
455	N	2023-05-03 12:00:00	0.691437	0.59776	0.614367	0.843875	0.969595	0.962511	0.942959	0.898575	0.992484	4	1
456	F	2023-05-03 12:00:00	0.628737	0.601723	0.588768	0.920651	0.999852	0.993995	0.972713	0.925249	0.999189	2	1
457	M	2023-05-03 12:00:00	0.674891	0.506668	0.579238	0.908907	0.999408	0.981498	0.994803	0.807261	0.99331	4	1
458	N	2023-05-03 12:00:00	0.676343	0.775401	0.652568	0.867539	0.98953	0.979345	0.942357	0.935464	0.995146	4	1
459	O	2023-05-03 12:00:00	0.67373	0.66084	0.574236	0.893292	0.991334	0.979345	0.939207	0.940605	0.995647	3	1
460	N	2023-05-03 12:00:00	0.962293	0.660659	0.810531	0.955883	0.986099	0.969366	0.969503	0.88486	0.999235	3	1
461	P	2023-05-03 12:00:00	0.829608	0.624107	0.568171	0.911238	1	0.991447	0.973917	0.910366	0.996301	3	1
462	Q	2023-05-03 12:00:00	0.792743	0.694262	0.512799	0.932285	1	0.995481	0.980337	0.95157	0.999496	2	1
463	H	2023-05-03 12:00:00	0.629028	0.494725	0.566163	0.890983	1	0.951501	0.934191	0.780547	0.993485	3	1
464	R	2023-05-03 12:00:00	0.569608	0.52413	0.370195	0.854937	0.994676	0.956749	0.967035	0.784336	0.998756	4	1
465	S	2023-05-03 12:00:00	0.704209	0.428858	0.409853	0.807499	0.835537	0.926782	0.890973	0.62304	0.994878	4	1
466	T	2023-05-03 12:00:00	0.764296	0.570544	0.57715	0.968287	1	0.995147	0.944764	0.847215	0.996297	2	1
467	I	2023-05-03 12:00:00	0.822642	0.652673	0.667769	0.680229	1	0.983864	0.98754	0.906361	0.997685	5	1
468	A	2023-05-03 16:00:00	0.653991	0.675497	0.627205	0.857326	0.990787	0.970974	0.977565	0.843934	0.986359	4	1
469	B	2023-05-03 16:00:00	0.660087	0.592983	0.611649	0.874665	1	0.970579	0.962822	0.889054	0.994389	3	1
470	C	2023-05-03 16:00:00	0.849347	0.669652	0.588532	0.933605	0.997042	0.988262	0.964487	0.900908	0.999595	3	1
471	D	2023-05-03 16:00:00	0.630015	0.593526	0.569668	0.84823	0.996451	0.963907	0.987962	0.941929	0.989977	4	1
472	E	2023-05-03 16:00:00	0.700435	0.575068	0.566694	0.909963	1	0.997179	0.995084	0.954169	0.995681	3	1
473	F	2023-05-03 16:00:00	0.605806	0.431392	0.508625	0.753046	1	0.989354	0.982785	0.933472	0.996874	5	1
474	G	2023-05-03 16:00:00	0.608999	0.55824	0.596014	0.900154	1	0.982712	0.967737	0.889192	0.997364	3	1
475	H	2023-05-03 16:00:00	0.670566	0.409315	0.689233	0.880888	1	0.973006	0.96238	0.836464	0.990157	3	1
476	G	2023-05-03 16:00:00	0.67373	0.435916	0.553954	0.8702	0.974712	0.962087	0.959752	0.530781	0.995597	4	1
477	I	2023-05-03 16:00:00	0.769231	0.611621	0.532412	0.631185	0.998521	0.982712	0.989045	0.934686	0.996655	6	1
478	H	2023-05-03 16:00:00	0.654282	0.556738	0.624496	0.929338	0.982653	0.978951	0.952389	0.827192	0.997241	2	1
479	J	2023-05-03 16:00:00	0.714659	0.543221	0.598496	0.886299	1	0.976039	0.97478	0.898985	0.98981	3	1
480	H	2023-05-03 16:00:00	0.584035	0.439227	0.552654	0.897361	0.998137	0.97246	0.935254	0.845017	0.993979	3	1
481	J	2023-05-03 16:00:00	0.8418	0.707888	0.538398	0.897735	1	0.972884	0.976224	0.931118	0.989215	3	1
482	K	2023-05-03 16:00:00	0.639187	0.66283	0.608538	0.864262	0.971754	0.956931	0.973074	0.905071	0.984368	4	1
483	H	2023-05-03 16:00:00	0.67402	0.553824	0.71122	0.905278	0.993656	0.977434	0.950382	0.789209	0.995327	3	1
484	L	2023-05-03 16:00:00	0.649347	0.464506	0.536232	0.968111	1	0.994844	0.985032	0.927887	0.996558	2	1
485	N	2023-05-03 16:00:00	0.666183	0.596023	0.621928	0.850165	0.971562	0.962238	0.942537	0.900643	0.99266	4	1
486	F	2023-05-03 16:00:00	0.591872	0.604708	0.613618	0.918122	0.999601	0.992751	0.970165	0.925452	0.99905	2	1
487	M	2023-05-03 16:00:00	0.657184	0.490201	0.57656	0.912536	0.999556	0.981195	1	0.807648	0.993292	4	1
488	N	2023-05-03 16:00:00	0.651669	0.765123	0.651938	0.871454	0.993227	0.980558	0.942858	0.935937	0.995834	4	1
489	O	2023-05-03 16:00:00	0.65312	0.65324	0.579553	0.891049	0.992783	0.977404	0.945406	0.94162	0.996431	3	1
490	N	2023-05-03 16:00:00	0.959158	0.659573	0.817974	0.959292	0.985064	0.970883	0.970205	0.882411	0.999207	4	1
491	P	2023-05-03 16:00:00	0.84209	0.620668	0.574905	0.908533	1	0.991204	0.974258	0.909892	0.999489	3	1
492	Q	2023-05-03 16:00:00	0.795936	0.713714	0.526229	0.933363	1	0.995086	0.975061	0.951882	0.999422	2	1
493	H	2023-05-03 16:00:00	0.644702	0.483144	0.564981	0.890873	0.998669	0.952138	0.934552	0.767694	0.993509	3	1
494	R	2023-05-03 16:00:00	0.554485	0.497458	0.311279	0.854937	0.994676	0.956749	0.967035	0.790965	0.993966	4	1
495	S	2023-05-03 16:00:00	0.699274	0.438449	0.442895	0.808313	0.834871	0.921231	0.894685	0.621126	0.995198	4	1
496	T	2023-05-03 16:00:00	0.749492	0.560592	0.573015	0.957774	1	0.995147	0.944223	0.84708	0.996309	2	1
497	I	2023-05-03 16:00:00	0.81103	0.665047	0.649653	0.591379	1	0.983955	0.987962	0.907592	0.997221	6	1
498	A	2023-05-03 20:00:00	0.642961	0.67423	0.626024	0.863158	0.992354	0.97252	0.979519	0.846843	0.988042	4	1
499	B	2023-05-03 20:00:00	0.691727	0.638402	0.644022	0.872971	0.999261	0.971186	0.961979	0.889686	0.994244	4	0
500	C	2023-05-03 20:00:00	0.849637	0.670847	0.589162	0.934176	0.996687	0.988383	0.963965	0.900212	0.999605	3	1
501	D	2023-05-03 20:00:00	0.659187	0.602573	0.574039	0.855399	0.995563	0.962997	0.9875	0.942125	0.989213	4	1
502	E	2023-05-03 20:00:00	0.723657	0.590268	0.578056	0.906246	1	0.997574	0.995385	0.953997	0.996287	3	1
503	F	2023-05-03 20:00:00	0.635414	0.46523	0.552497	0.753596	1	0.989597	0.981822	0.932988	0.997613	5	1
504	G	2023-05-03 20:00:00	0.580261	0.488211	0.586563	0.894436	1	0.981802	0.967256	0.891627	0.997551	3	1
505	H	2023-05-03 20:00:00	0.68119	0.428316	0.707309	0.890565	1	0.977252	0.963484	0.836583	0.991878	3	1
506	G	2023-05-03 20:00:00	0.674949	0.435373	0.550173	0.871278	0.97486	0.961783	0.959933	0.532135	0.995641	4	1
507	I	2023-05-03 20:00:00	0.78897	0.616326	0.533239	0.631185	0.999408	0.983621	0.992516	0.935245	0.996954	6	1
508	H	2023-05-03 20:00:00	0.660087	0.56061	0.626122	0.926919	0.981943	0.978587	0.954034	0.826783	0.997142	2	1
509	J	2023-05-03 20:00:00	0.718723	0.542678	0.599874	0.886519	1	0.976342	0.976004	0.899137	0.990245	3	1
510	H	2023-05-03 20:00:00	0.602322	0.463855	0.577505	0.89967	0.99787	0.973794	0.934793	0.845693	0.993915	3	1
511	J	2023-05-03 20:00:00	0.861248	0.70825	0.543045	0.887398	1	0.971975	0.976686	0.930607	0.989083	3	1
512	K	2023-05-03 20:00:00	0.648186	0.670611	0.615784	0.863141	0.971754	0.957264	0.973917	0.901455	0.98658	4	1
513	H	2023-05-03 20:00:00	0.669956	0.558493	0.711074	0.904728	0.994247	0.977586	0.948837	0.789405	0.995224	3	1
514	L	2023-05-03 20:00:00	0.672569	0.448944	0.551985	0.968551	1	0.995147	0.983869	0.927616	0.996979	2	1
515	N	2023-05-03 20:00:00	0.678084	0.613521	0.643273	0.851594	0.970393	0.963452	0.941153	0.903366	0.993052	4	1
516	F	2023-05-03 20:00:00	0.614224	0.607405	0.6263	0.921399	0.99963	0.993358	0.96846	0.924775	0.999217	2	1
517	M	2023-05-03 20:00:00	0.658926	0.488754	0.582388	0.914405	0.999852	0.982408	0.993379	0.808508	0.993903	4	1
518	N	2023-05-03 20:00:00	0.667054	0.760346	0.673244	0.877436	0.992724	0.980801	0.944183	0.935937	0.996152	3	1
519	O	2023-05-03 20:00:00	0.671118	0.66844	0.599244	0.900726	0.993064	0.984076	0.946189	0.941823	0.996519	3	1
520	N	2023-05-03 20:00:00	0.921742	0.64944	0.791509	0.951397	0.98462	0.972096	0.9687	0.89428	0.999178	3	1
521	P	2023-05-03 20:00:00	0.845283	0.62483	0.577899	0.911172	1	0.991538	0.973395	0.910028	0.999399	3	1
522	Q	2023-05-03 20:00:00	0.800581	0.715162	0.528158	0.934154	1	0.995299	0.977428	0.951875	0.999458	2	1
523	H	2023-05-03 20:00:00	0.654862	0.482239	0.567738	0.885529	0.999261	0.953018	0.934331	0.757682	0.994137	3	1
524	R	2023-05-03 20:00:00	0.557446	0.523008	0.381026	0.854805	0.994499	0.957386	0.972332	0.790154	0.994687	4	1
525	S	2023-05-03 20:00:00	0.711756	0.486763	0.515202	0.81302	0.821148	0.923597	0.892378	0.620747	0.995653	4	1
526	T	2023-05-03 20:00:00	0.753556	0.561135	0.571282	0.956037	1	0.995147	0.945968	0.846343	0.996364	2	1
527	I	2023-05-03 20:00:00	0.818868	0.655235	0.761106	0.658016	1	0.984926	0.987259	0.907031	0.997582	6	1
528	A	2023-05-04	0.637155	0.676221	0.632325	0.863158	0.992354	0.97252	0.979519	0.848467	0.988682	4	1
529	B	2023-05-04	0.735269	0.663011	0.653867	0.872971	0.999261	0.971186	0.961979	0.888334	0.994531	4	0
530	C	2023-05-04	0.849637	0.671462	0.590186	0.934176	0.996687	0.988383	0.963965	0.900117	0.999605	3	1
531	D	2023-05-04	0.683512	0.618678	0.574315	0.855399	0.995563	0.962997	0.9875	0.941403	0.987213	4	1
532	E	2023-05-04	0.751234	0.650345	0.599831	0.906246	1	0.997574	0.995385	0.953737	0.997023	3	1
533	F	2023-05-04	0.646444	0.520059	0.589595	0.753596	1	0.989597	0.981822	0.932045	0.998257	5	1
534	G	2023-05-04	0.580261	0.528021	0.619959	0.894436	1	0.981802	0.967256	0.892439	0.997493	3	1
535	H	2023-05-04	0.68418	0.447316	0.712941	0.890565	1	0.977252	0.963484	0.837118	0.992661	3	1
536	G	2023-05-04	0.672743	0.430668	0.543439	0.871278	0.97486	0.961783	0.959933	0.531552	0.996356	4	1
537	I	2023-05-04	0.78955	0.624287	0.536823	0.631185	0.999408	0.983621	0.992516	0.935966	0.996944	6	1
538	H	2023-05-04	0.667054	0.563017	0.628277	0.926919	0.981943	0.978587	0.954034	0.826628	0.997064	2	1
539	J	2023-05-04	0.722206	0.542316	0.609759	0.886519	1	0.976342	0.976004	0.899192	0.990449	3	1
540	H	2023-05-04	0.613353	0.484483	0.587902	0.89967	0.99787	0.973794	0.934793	0.844679	0.994215	3	1
541	J	2023-05-04	0.870537	0.704269	0.544896	0.889598	1	0.973066	0.977508	0.92936	0.989578	3	1
542	K	2023-05-04	0.658636	0.672783	0.619841	0.863141	0.971754	0.957264	0.973917	0.900051	0.986526	4	1
543	H	2023-05-04	0.666763	0.564808	0.716765	0.905916	0.993123	0.977768	0.951185	0.790037	0.995247	3	1
544	L	2023-05-04	0.698694	0.471925	0.583491	0.968551	1	0.995147	0.983869	0.92809	0.996815	2	1
545	N	2023-05-04	0.68418	0.623654	0.655049	0.851594	0.970393	0.963452	0.941153	0.90293	0.99329	4	1
546	F	2023-05-04	0.632511	0.625301	0.638902	0.921399	0.99963	0.993358	0.96846	0.924369	0.999182	2	1
547	M	2023-05-04	0.66328	0.495268	0.588768	0.917638	0.999704	0.983015	0.99358	0.808256	0.993924	4	1
548	N	2023-05-04	0.680987	0.767114	0.683444	0.877436	0.992724	0.980801	0.944183	0.937628	0.996201	3	1
549	N	2023-05-04	0.926357	0.651069	0.760239	0.951397	0.98462	0.972096	0.9687	0.891327	0.999207	2	1
550	P	2023-05-04	0.84238	0.621573	0.574118	0.911172	1	0.991538	0.973395	0.909892	0.999418	3	1
551	Q	2023-05-04	0.796807	0.705789	0.523275	0.934154	1	0.995299	0.977428	0.951732	0.999504	2	1
552	H	2023-05-04	0.660087	0.48803	0.572858	0.863602	1	0.952351	0.935194	0.751594	0.994506	4	1
553	R	2023-05-04	0.566183	0.549644	0.470621	0.854805	0.994499	0.957386	0.972332	0.789883	0.997195	4	1
554	S	2023-05-04	0.71553	0.496897	0.541391	0.819177	0.821961	0.922505	0.892117	0.620578	0.995697	4	1
555	T	2023-05-04	0.757329	0.570002	0.575575	0.956037	1	0.995147	0.945968	0.846221	0.996314	2	1
556	I	2023-05-04	0.815094	0.661048	0.728812	0.658016	1	0.984926	0.987259	0.907139	0.997528	6	1
557	A	2023-05-04 04:00:00	0.63164	0.677669	0.644534	0.860145	0.993123	0.974037	0.980992	0.850091	0.989251	4	1
558	B	2023-05-04 04:00:00	0.751524	0.678031	0.65564	0.871322	0.993493	0.968456	0.960675	0.889347	0.994453	4	0
559	C	2023-05-04 04:00:00	0.853701	0.670847	0.588138	0.937695	0.997264	0.988535	0.961899	0.900814	0.999574	3	1
560	D	2023-05-04 04:00:00	0.693266	0.623564	0.578332	0.854497	0.992902	0.961177	0.986858	0.940257	0.987436	4	1
561	E	2023-05-04 04:00:00	0.781422	0.676221	0.611858	0.912514	1	0.997331	0.995927	0.953382	0.9973	3	1
562	F	2023-05-04 04:00:00	0.66357	0.599859	0.625512	0.744887	1	0.989506	0.983006	0.932225	0.998124	5	1
563	G	2023-05-04 04:00:00	0.594775	0.58104	0.633349	0.897075	1	0.979072	0.961598	0.891153	0.996675	3	1
564	H	2023-05-04 04:00:00	0.685631	0.457449	0.718927	0.902243	1	0.977555	0.964306	0.837717	0.993002	3	1
565	G	2023-05-04 04:00:00	0.681538	0.447497	0.576205	0.87539	0.972198	0.962997	0.959832	0.534591	0.995175	3	1
566	I	2023-05-04 04:00:00	0.793033	0.627364	0.542533	0.632285	1	0.983621	0.99045	0.936559	0.997111	6	1
567	H	2023-05-04 04:00:00	0.650508	0.564718	0.638815	0.925885	0.981692	0.979648	0.948476	0.828471	0.997445	2	1
568	J	2023-05-04 04:00:00	0.718723	0.544125	0.604915	0.899494	1	0.974219	0.975683	0.89938	0.990292	3	1
569	H	2023-05-04 04:00:00	0.617997	0.505745	0.599204	0.909567	0.998418	0.973703	0.936217	0.844205	0.994184	3	1
570	J	2023-05-04 04:00:00	0.866763	0.70065	0.548322	0.900594	1	0.973794	0.977769	0.927534	0.990282	3	1
571	H	2023-05-04 04:00:00	0.669086	0.569495	0.720558	0.932945	0.992561	0.977798	0.947954	0.790028	0.995165	2	1
572	L	2023-05-04 04:00:00	0.71611	0.504135	0.602001	0.97031	1	0.995147	0.985233	0.927819	0.996757	2	1
573	N	2023-05-04 04:00:00	0.688534	0.626115	0.658199	0.856125	0.971902	0.963027	0.945426	0.902625	0.993464	4	1
574	F	2023-05-04 04:00:00	0.639768	0.622007	0.650756	0.917286	0.999468	0.99354	0.974379	0.926128	0.99916	3	1
575	M	2023-05-04 04:00:00	0.665893	0.495268	0.59503	0.915659	0.999704	0.982712	0.992717	0.808812	0.993959	4	1
576	N	2023-05-04 04:00:00	0.689985	0.77294	0.683444	0.887904	0.993833	0.981923	0.942738	0.939455	0.996478	3	1
577	N	2023-05-04 04:00:00	0.935965	0.656316	0.762484	0.956741	0.982993	0.972096	0.969322	0.889117	0.99925	2	1
578	P	2023-05-04 04:00:00	0.836865	0.619945	0.569983	0.914779	1	0.991568	0.974679	0.909825	0.999377	3	1
579	Q	2023-05-04 04:00:00	0.792743	0.68887	0.512799	0.932131	1	0.995147	0.977669	0.951546	0.999479	2	1
580	H	2023-05-04 04:00:00	0.665312	0.492192	0.576796	0.890917	1	0.953473	0.936859	0.748888	0.995096	3	1
581	R	2023-05-04 04:00:00	0.582525	0.579538	0.552064	0.873279	0.994587	0.959205	0.971931	0.783321	0.997381	4	1
582	S	2023-05-04 04:00:00	0.698984	0.488935	0.494408	0.8128	0.836202	0.922384	0.887241	0.62394	0.996126	4	1
583	T	2023-05-04 04:00:00	0.75762	0.573078	0.573645	0.95419	1	0.99545	0.945988	0.845998	0.996225	2	1
584	I	2023-05-04 04:00:00	0.818287	0.661014	0.777647	0.659556	1	0.984774	0.987801	0.90722	0.997935	6	1
585	A	2023-05-04 08:00:00	0.63164	0.683821	0.650441	0.85645	0.992532	0.971732	0.980665	0.851444	0.98552	4	1
586	B	2023-05-04 08:00:00	0.738752	0.668078	0.639729	0.865956	0.998521	0.969669	0.960715	0.891766	0.994618	4	1
587	C	2023-05-04 08:00:00	0.853701	0.671154	0.590658	0.929888	0.997175	0.988323	0.962621	0.900651	0.999597	3	1
588	D	2023-05-04 08:00:00	0.67312	0.619583	0.574709	0.842336	0.993197	0.959357	0.987239	0.940598	0.987332	4	1
589	H	2023-05-04 08:00:00	0.662409	0.53515	0.65627	0.901012	1	0.97434	0.954816	0.857179	0.994495	3	1
590	E	2023-05-04 08:00:00	0.790421	0.671878	0.600091	0.906554	1	0.997028	0.994482	0.95336	0.996783	3	1
591	F	2023-05-04 08:00:00	0.667054	0.601668	0.60972	0.746184	1	0.989779	0.981882	0.9323	0.998482	5	1
592	G	2023-05-04 08:00:00	0.605806	0.608183	0.637721	0.889598	1	0.979982	0.960916	0.890815	0.996442	3	1
593	H	2023-05-04 08:00:00	0.687692	0.450392	0.709987	0.897779	1	0.977555	0.963083	0.838303	0.991831	3	1
594	G	2023-05-04 08:00:00	0.679507	0.433563	0.555608	0.87704	0.976338	0.964816	0.960936	0.536524	0.99689	3	1
595	I	2023-05-04 08:00:00	0.780842	0.623383	0.541627	0.627887	0.998817	0.983925	0.990349	0.937895	0.996886	6	1
596	H	2023-05-04 08:00:00	0.645283	0.562528	0.635992	0.928964	0.982505	0.979466	0.954114	0.828024	0.997409	2	1
597	J	2023-05-04 08:00:00	0.714078	0.545754	0.606333	0.858588	1	0.975432	0.974278	0.899739	0.990063	4	1
598	H	2023-05-04 08:00:00	0.6209	0.511572	0.607908	0.910007	0.997811	0.972369	0.935094	0.843934	0.993701	3	1
599	J	2023-05-04 08:00:00	0.858345	0.70065	0.548362	0.904113	1	0.974098	0.976746	0.926996	0.990629	3	1
600	H	2023-05-04 08:00:00	0.665893	0.572824	0.720499	0.904684	0.991763	0.977009	0.947995	0.790767	0.995161	3	1
601	L	2023-05-04 08:00:00	0.721916	0.526573	0.596093	0.968111	1	0.995147	0.985153	0.928225	0.99692	2	1
602	N	2023-05-04 08:00:00	0.674311	0.600221	0.668911	0.838839	0.89648	0.881438	0.922835	0.896674	0.992599	5	1
603	F	2023-05-04 08:00:00	0.647605	0.643487	0.653828	0.91876	0.99929	0.993145	0.970185	0.925519	0.999265	2	1
604	M	2023-05-04 08:00:00	0.66357	0.493278	0.591052	0.918364	1	0.983621	0.993178	0.808633	0.994511	4	1
605	N	2023-05-04 08:00:00	0.667634	0.779201	0.676709	0.887904	0.994765	0.983015	0.944303	0.940537	0.997058	3	1
606	O	2023-05-04 08:00:00	0.660377	0.677669	0.596605	0.880823	0.993863	0.984926	0.947011	0.945408	0.995603	3	1
607	N	2023-05-04 08:00:00	0.952017	0.662288	0.776426	0.949879	0.983289	0.969973	0.970827	0.886186	0.999269	3	1
608	P	2023-05-04 08:00:00	0.829028	0.617411	0.566556	0.904684	1	0.991325	0.973315	0.910298	0.999319	3	1
609	Q	2023-05-04 08:00:00	0.78897	0.661166	0.502009	0.934308	1	0.99539	0.97805	0.951599	0.999445	2	1
610	H	2023-05-04 08:00:00	0.66299	0.500154	0.575221	0.886189	1	0.953382	0.936779	0.759103	0.994799	3	1
611	R	2023-05-04 08:00:00	0.599274	0.573747	0.548874	0.87097	0.993907	0.958265	0.971028	0.780209	0.997419	4	1
612	S	2023-05-04 08:00:00	0.695501	0.498163	0.522763	0.823158	0.839678	0.923203	0.893421	0.623176	0.99634	4	1
613	T	2023-05-04 08:00:00	0.757329	0.574164	0.57778	0.95861	1	0.99545	0.945687	0.84614	0.996241	2	1
614	I	2023-05-04 08:00:00	0.811321	0.664664	0.787098	0.659996	1	0.985623	0.987641	0.907349	0.997882	6	1
615	A	2023-05-04 12:00:00	0.624383	0.68165	0.655561	0.85645	0.992532	0.971732	0.980665	0.849549	0.989258	4	1
616	B	2023-05-04 12:00:00	0.674891	0.623745	0.607239	0.867913	1	0.969063	0.961979	0.893705	0.99484	4	1
617	C	2023-05-04 12:00:00	0.849637	0.66996	0.58865	0.932615	0.996998	0.98805	0.96543	0.900448	0.999604	3	1
618	D	2023-05-04 12:00:00	0.617852	0.611259	0.578017	0.846888	0.993789	0.96057	0.988142	0.940903	0.987445	4	1
619	H	2023-05-04 12:00:00	0.636284	0.50323	0.687618	0.898197	1	0.975129	0.954636	0.857711	0.994964	3	1
620	E	2023-05-04 12:00:00	0.74717	0.635507	0.57259	0.913679	1	0.99721	0.995867	0.95401	0.996864	3	1
621	F	2023-05-04 12:00:00	0.634833	0.479706	0.540761	0.743259	1	0.988687	0.98126	0.933218	0.997881	5	1
622	G	2023-05-04 12:00:00	0.594775	0.560954	0.599716	0.891797	1	0.979982	0.961538	0.892506	0.997119	3	1
623	H	2023-05-04 12:00:00	0.668186	0.413658	0.693565	0.887508	1	0.974522	0.963303	0.838958	0.991172	3	1
624	G	2023-05-04 12:00:00	0.670653	0.406963	0.50512	0.880229	0.978113	0.96512	0.962501	0.543957	0.997484	3	1
625	I	2023-05-04 12:00:00	0.719013	0.632611	0.556514	0.630965	0.998077	0.983318	0.990791	0.932066	0.996755	6	1
626	H	2023-05-04 12:00:00	0.639187	0.563397	0.638477	0.929888	0.976634	0.979042	0.950904	0.827907	0.997324	2	1
627	J	2023-05-04 12:00:00	0.707112	0.547744	0.612358	0.819221	1	0.975736	0.975001	0.899647	0.990079	4	1
628	H	2023-05-04 12:00:00	0.609869	0.484719	0.586523	0.909061	0.998536	0.970731	0.933047	0.842852	0.993965	3	1
629	J	2023-05-04 12:00:00	0.841509	0.701554	0.548795	0.903893	1	0.974765	0.977147	0.92748	0.990862	3	1
630	K	2023-05-04 12:00:00	0.629028	0.66844	0.620195	0.864416	0.973972	0.956627	0.973797	0.897893	0.984923	4	1
631	H	2023-05-04 12:00:00	0.659216	0.572499	0.719234	0.903563	0.989323	0.976433	0.94667	0.790978	0.994964	3	1
632	L	2023-05-04 12:00:00	0.695791	0.487487	0.550016	0.96965	1	0.995147	0.985414	0.928699	0.997072	2	1
633	N	2023-05-04 12:00:00	0.62119	0.579918	0.631222	0.842248	0.928793	0.923264	0.931241	0.90114	0.994745	4	1
634	F	2023-05-04 12:00:00	0.629028	0.639325	0.634176	0.918892	0.999438	0.99357	0.969744	0.924775	0.999292	2	1
635	M	2023-05-04 12:00:00	0.636284	0.482782	0.572031	0.913371	1	0.981498	0.993018	0.811372	0.994048	4	1
636	N	2023-05-04 12:00:00	0.615385	0.778297	0.66198	0.904926	0.9958	0.983167	0.944704	0.941552	0.996541	3	1
637	O	2023-05-04 12:00:00	0.611901	0.663554	0.587705	0.902177	0.995726	0.98529	0.94669	0.946423	0.995834	3	1
638	N	2023-05-04 12:00:00	0.959013	0.663011	0.790485	0.959292	0.982254	0.969366	0.97181	0.884749	0.999284	3	1
639	P	2023-05-04 12:00:00	0.816255	0.617411	0.56951	0.909721	1	0.991234	0.973957	0.911381	0.999127	3	1
640	Q	2023-05-04 12:00:00	0.78897	0.658632	0.499212	0.927931	1	0.995329	0.979234	0.951712	0.999509	2	1
641	H	2023-05-04 12:00:00	0.644702	0.496535	0.567738	0.874951	1	0.954716	0.938525	0.750105	0.9956	3	1
642	R	2023-05-04 12:00:00	0.598316	0.530988	0.417691	0.857005	0.993656	0.959418	0.972091	0.78305	0.997222	4	1
643	S	2023-05-04 12:00:00	0.703048	0.501963	0.532569	0.826259	0.82764	0.924234	0.89617	0.622574	0.996482	4	1
644	T	2023-05-04 12:00:00	0.749202	0.561316	0.56951	0.952254	1	0.995147	0.94344	0.846248	0.996265	2	1
645	I	2023-05-04 12:00:00	0.795065	0.664048	0.765438	0.666373	1	0.982924	0.98756	0.908648	0.997869	6	1
646	B	2023-05-04 16:00:00	0.637446	0.595516	0.613934	0.869672	1	0.970883	0.958488	0.895058	0.994851	4	1
647	C	2023-05-04 16:00:00	0.849637	0.66996	0.587232	0.932087	0.997235	0.988201	0.963504	0.900462	0.999607	3	1
648	D	2023-05-04 16:00:00	0.651698	0.608545	0.574984	0.863229	0.993345	0.961783		0.94108	0.988115	4	0
649	H	2023-05-04 16:00:00	0.632511	0.474223	0.643313	0.889751	1	0.973946	0.953572	0.859316	0.994954	3	1
650	E	2023-05-04 16:00:00	0.71582	0.601126	0.565647	0.913591	1	0.99721	0.994964	0.954452	0.996627	3	1
651	F	2023-05-04 16:00:00	0.635414	0.430125	0.51721	0.744381	1	0.988565	0.982244	0.933743	0.997761	5	1
652	G	2023-05-04 16:00:00	0.584035	0.566383	0.611807	0.892457	1	0.980285	0.960896	0.891965	0.996874	3	1
653	H	2023-05-04 16:00:00	0.665312	0.398096	0.691202	0.883	1	0.974826	0.964066	0.839121	0.990689	3	1
654	G	2023-05-04 16:00:00	0.672888	0.434649	0.558444	0.876754	0.972641	0.96694	0.961999	0.536747	0.996577	3	1
655	I	2023-05-04 16:00:00	0.761393	0.612887	0.523354	0.630965	1	0.983318	0.993078	0.929773	0.996691	6	1
656	H	2023-05-04 16:00:00	0.638897	0.562275	0.635814	0.844381	0.978557	0.849864	0.841857	0.827089	0.997205	6	1
657	J	2023-05-04 16:00:00	0.703048	0.549192	0.609326	0.819221	1	0.975432	0.973917	0.899848	0.990099	4	1
658	H	2023-05-04 16:00:00	0.593033	0.44974	0.558798	0.903013	0.998447	0.973127	0.937642	0.843123	0.994218	3	1
659	I	2023-05-04 16:00:00	0.732221	0.437001	0.62248	0.820343	0.99231	0.980588	0.977549	0.891841	0.996354	4	1
660	J	2023-05-04 16:00:00	0.833382	0.71024	0.544463	0.903013	1	0.973491	0.975643	0.929252	0.989196	3	1
661	H	2023-05-04 16:00:00	0.651089	0.572499	0.723767	0.90662	0.988761	0.976494	0.951606	0.791549	0.995197	3	1
662	L	2023-05-04 16:00:00	0.68418	0.448582	0.524811	0.968771	1	0.994844	0.985554	0.928969	0.997107	2	1
663	N	2023-05-04 16:00:00	0.605806	0.573964	0.632601	0.849615	0.963812	0.942493	0.936939	0.904422	0.994484	4	1
664	F	2023-05-04 16:00:00	0.606676	0.628576	0.608066	0.917044	0.999246	0.993388	0.97177	0.923354	0.999181	3	1
665	M	2023-05-04 16:00:00	0.640639	0.480973	0.588296	0.881922	0.997486	0.973006	0.992215	0.810109	0.987351	4	1
666	N	2023-05-04 16:00:00	0.591582	0.694371	0.596684	0.904816	0.996125	0.981741	0.944243	0.943243	0.995389	3	1
667	O	2023-05-04 16:00:00	0.597968	0.65523	0.597747	0.906598	0.996051	0.985138	0.948837	0.946693	0.996105	3	1
668	N	2023-05-04 16:00:00	0.918665	0.651249	0.806396	0.955597	0.982402	0.971793	0.968781	0.894086	0.999221	3	1
669	P	2023-05-04 16:00:00	0.823222	0.615421	0.563918	0.91181	1	0.991052	0.973456	0.91111	0.99919	3	1
670	Q	2023-05-04 16:00:00	0.765167	0.575105	0.478812	0.929822	1	0.994631	0.977348	0.952083	0.999398	2	1
671	H	2023-05-04 16:00:00	0.640929	0.49364	0.560649	0.874621	1	0.957082	0.938745	0.755044	0.995682	3	1
672	R	2023-05-04 16:00:00	0.585806	0.495377	0.288043	0.843039	0.994203	0.96054	0.967436	0.78853	0.99378	4	1
673	S	2023-05-04 16:00:00	0.697242	0.491106	0.503151	0.825269	0.839959	0.92569	0.896631	0.621606	0.99654	4	1
674	T	2023-05-04 16:00:00	0.741655	0.552449	0.568919	0.959006	1	0.994844	0.947794	0.845971	0.99628	2	1
675	I	2023-05-04 16:00:00	0.782583	0.665588	0.780009	0.661535	1	0.986109	0.98748	0.90879	0.997854	6	1
676	A	2023-05-04 20:00:00	0.617997	0.674954	0.651229	0.862868	0.99475	0.976403	0.982984	0.854488	0.991598	4	1
677	B	2023-05-04 20:00:00	0.669376	0.638945	0.646818	0.869166	1	0.970883	0.95919	0.893823	0.994955	4	1
678	C	2023-05-04 20:00:00	0.845573	0.668458	0.585854	0.932681	0.997072	0.988262	0.965049	0.900361	0.999624	3	1
679	D	2023-05-04 20:00:00	0.679507	0.617954	0.579553	0.865274	0.993049	0.96239	0.988263	0.941166	0.98782	4	1
680	H	2023-05-04 20:00:00	0.651089	0.473499	0.66009	0.887486	1	0.974826	0.953051	0.858425	0.995148	3	1
681	E	2023-05-04 20:00:00	0.723367	0.609087	0.576536	0.914097	1	0.997301	0.996047	0.954292	0.997156	3	1
682	F	2023-05-04 20:00:00	0.657184	0.461611	0.551749	0.631779	1	0.989324	0.983909	0.933335	0.998299	6	1
683	G	2023-05-04 20:00:00	0.583454	0.513544	0.594912	0.888718	1	0.979678	0.961778	0.892506	0.997026	3	1
684	H	2023-05-04 20:00:00	0.683541	0.406963	0.699118	0.888696	1	0.976342	0.963444	0.838692	0.992292	3	1
685	G	2023-05-04 20:00:00	0.671408	0.42723	0.544896	0.872883	0.97205	0.962693	0.960755	0.531141	0.99515	4	1
686	I	2023-05-04 20:00:00	0.776778	0.627002	0.531467	0.702661	1	0.986048	0.993078	0.930932	0.996918	5	1
687	H	2023-05-04 20:00:00	0.646734	0.563759	0.633385	0.939081	0.985226	0.977586	0.940711	0.826997	0.996949	2	1
688	J	2023-05-04 20:00:00	0.703338	0.551002	0.615312	0.91137	1	0.976039	0.972633	0.900666	0.99022	3	1
689	H	2023-05-04 20:00:00	0.613353	0.462823	0.568919	0.902199	0.99858	0.974492	0.936458	0.842987	0.99438	3	1
690	I	2023-05-04 20:00:00	0.747257	0.452382	0.624882	0.821729	0.993641	0.981498	0.979033	0.891648	0.996767	4	1
691	J	2023-05-04 20:00:00	0.870827	0.712773	0.544896	0.894656	1	0.973218	0.977589	0.930476	0.989141	3	1
692	K	2023-05-04 20:00:00	0.641219	0.67405	0.628781	0.85872	0.971458	0.957507	0.97496	0.896224	0.986172	4	1
693	H	2023-05-04 20:00:00	0.650798	0.577167	0.725977	0.903915	0.989337	0.976706	0.945065	0.791576	0.994815	3	1
694	L	2023-05-04 20:00:00	0.695791	0.43682	0.534263	0.965912	1	0.994844	0.985735	0.929037	0.997283	2	1
695	N	2023-05-04 20:00:00	0.622351	0.621211	0.660996	0.856367	0.981026	0.95414	0.941735	0.907487	0.993333	4	1
696	F	2023-05-04 20:00:00	0.636284	0.554892	0.609011	0.917286	1	0.993843	0.976164	0.928563	0.999256	3	1
697	M	2023-05-04 20:00:00	0.648186	0.492011	0.598653	0.898043	0.999113	0.978465	0.993459	0.809707	0.991425	4	1
698	N	2023-05-04 20:00:00	0.615675	0.704974	0.62563	0.904311	0.995608	0.982226	0.945125	0.944326	0.995314	3	1
699	O	2023-05-04 20:00:00	0.6209	0.673507	0.612279	0.905366	0.99614	0.986473	0.948255	0.947234	0.996031	3	1
700	N	2023-05-04 20:00:00	0.904644	0.647992	0.780955	0.945569	1	0.971793	0.967316	0.896699	0.999169	3	1
701	P	2023-05-04 20:00:00	0.774746	0.59443	0.541864	0.909787	1	0.991204	0.973476	0.911448	0.998344	3	1
702	Q	2023-05-04 20:00:00	0.761103	0.56622	0.480112	0.930218	1	0.994874	0.975562	0.952149	0.9994	2	1
703	H	2023-05-04 20:00:00	0.657475	0.493459	0.563012	0.874445	1	0.959084	0.940009	0.751323	0.995915	3	1
704	R	2023-05-04 20:00:00	0.599739	0.513599	0.33865	0.844689	0.994706	0.962026	0.972292	0.794415	0.996086	4	1
705	S	2023-05-04 20:00:00	0.691437	0.475725	0.455773	0.814647	0.840373	0.923749	0.895568	0.620652	0.996729	4	1
706	T	2023-05-04 20:00:00	0.752395	0.568735	0.570849	0.955333	1	0.994844	0.942959	0.845896	0.996251	2	1
707	I	2023-05-04 20:00:00	0.778229	0.672123	0.746534	0.662415	1	0.983379	0.987681	0.909141	0.997644	6	1
708	A	2023-05-05	0.617126	0.677669	0.655167	0.862868	0.99475	0.976403	0.982984	0.852458	0.992079	4	1
709	B	2023-05-05	0.712337	0.668259	0.657845	0.869166	1	0.970883	0.95919	0.89332	0.994793	4	0
710	C	2023-05-05	0.845864	0.668458	0.584987	0.932681	0.997072	0.988262	0.965049	0.899813	0.999614	3	1
711	D	2023-05-05	0.702003	0.621573	0.580419	0.865274	0.993049	0.96239	0.988263	0.941453	0.988223	4	1
712	H	2023-05-05	0.662409	0.507193	0.689902	0.887486	1	0.974826	0.953051	0.857696	0.995059	3	1
713	E	2023-05-05	0.750943	0.656859	0.596979	0.914097	1	0.997361	0.996067	0.954022	0.997052	3	1
714	F	2023-05-05	0.672569	0.513001	0.587744	0.631779	1	0.989324	0.983909	0.93339	0.998479	6	1
715	G	2023-05-05	0.590421	0.448763	0.597984	0.888718	1	0.979678	0.961778	0.893521	0.997107	3	1
716	H	2023-05-05	0.690131	0.42922	0.709712	0.888696	1	0.976342	0.963444	0.838296	0.993026	3	1
717	G	2023-05-05	0.679536	0.423068	0.549071	0.872883	0.97205	0.962693	0.960755	0.52559	0.996714	4	1
718	I	2023-05-05	0.781132	0.631707	0.535759	0.702661	1	0.986048	0.993078	0.931504	0.996685	5	1
719	H	2023-05-05	0.649347	0.567269	0.638158	0.939081	0.985226	0.977586	0.940711	0.82692	0.996856	2	1
720	J	2023-05-05	0.707112	0.551725	0.613225	0.91137	1	0.976039	0.972633	0.901158	0.990432	3	1
721	H	2023-05-05	0.6209	0.503863	0.596172	0.902199	0.99858	0.974492	0.936458	0.842582	0.994322	3	1
722	I	2023-05-05	0.756836	0.466135	0.629411	0.821729	0.993641	0.981498	0.979033	0.891477	0.997307	4	1
723	J	2023-05-05	0.891727	0.712773	0.54592	0.894656	1	0.973218	0.977589	0.931325	0.989385	3	1
724	K	2023-05-05	0.653991	0.679116	0.636382	0.85872	0.971458	0.957507	0.97496	0.894892	0.986096	4	1
725	H	2023-05-05	0.65254	0.577167	0.728359	0.903915	0.989337	0.976706	0.945065	0.791759	0.994881	3	1
726	L	2023-05-05	0.71611	0.471563	0.569707	0.965912	1	0.994844	0.985735	0.928766	0.996395	2	1
727	N	2023-05-05	0.636284	0.636267	0.676512	0.856367	0.981026	0.95414	0.941735	0.910567	0.993769	4	1
728	F	2023-05-05	0.640058	0.563849	0.622204	0.917286	1	0.993843	0.976164	0.928225	0.999253	3	1
729	M	2023-05-05	0.654282	0.499249	0.608538	0.898043	0.999113	0.978465	0.993459	0.810576	0.990592	4	1
730	N	2023-05-05	0.637736	0.712448	0.632443	0.904311	0.995608	0.982226	0.945125	0.944867	0.995359	3	1
731	O	2023-05-05	0.642671	0.681107	0.615391	0.905366	0.99614	0.986473	0.948255	0.947302	0.995709	3	1
732	N	2023-05-05	0.89553	0.637497	0.687815	0.945569	1	0.971793	0.967316	0.901969	0.998432	2	1
733	P	2023-05-05	0.820319	0.612707	0.557813	0.909787	1	0.991204	0.973476	0.910839	0.999107	3	1
734	Q	2023-05-05	0.765167	0.579122	0.482514	0.930218	1	0.994874	0.975562	0.952023	0.999401	2	1
735	H	2023-05-05	0.6627	0.490563	0.571676	0.874445	1	0.959084	0.940009	0.744355	0.995877	3	1
736	R	2023-05-05	0.618607	0.549174	0.426315	0.844689	0.994706	0.962026	0.972292	0.787786	0.997752	4	1
737	S	2023-05-05	0.698403	0.493278	0.491808	0.814647	0.840373	0.923749	0.895568	0.619279	0.996677	4	1
738	T	2023-05-05	0.752975	0.55643	0.57333	0.955333	1	0.994844	0.942959	0.845585	0.996424	2	1
739	I	2023-05-05	0.771263	0.67433	0.754017	0.662415	1	0.983379	0.987681	0.910122	0.99752	6	1
740	A	2023-05-05 04:00:00	0.613062	0.681288	0.667769	0.86384	0.993138	0.976403	0.983219	0.851579	0.991154	4	1
741	B	2023-05-05 04:00:00	0.738752	0.677669	0.660877	0.868595	0.99231	0.968153	0.958107	0.892177	0.994917	4	0
742	C	2023-05-05 04:00:00	0.849637	0.666359	0.583491	0.940114	0.997175	0.988687	0.966092	0.899488	0.999603	3	1
743	D	2023-05-05 04:00:00	0.716546	0.620126	0.577032	0.852628	0.992754	0.956324	0.986557	0.942396	0.983426	4	1
744	H	2023-05-05 04:00:00	0.671118	0.543058	0.703292	0.892874	1	0.974522	0.954214	0.857211	0.994994	3	1
745	E	2023-05-05 04:00:00	0.782293	0.679116	0.60805	0.914845	1	0.997392	0.995466	0.953633	0.997389	3	1
746	F	2023-05-05 04:00:00	0.699274	0.584297	0.618069	0.750077	1	0.988929	0.982745	0.934242	0.998612	5	1
747	G	2023-05-05 04:00:00	0.605806	0.542678	0.625788	0.892017	1	0.979678	0.960956	0.892642	0.997131	3	1
748	H	2023-05-05 04:00:00	0.69164	0.440982	0.715501	0.902771	1	0.976645	0.964226	0.838061	0.992545	3	1
749	G	2023-05-05 04:00:00	0.682061	0.42723	0.560058	0.880471	0.977078	0.966636	0.964688	0.527038	0.997132	3	1
750	I	2023-05-05 04:00:00	0.78897	0.627364	0.541037	0.70486	1	0.986048	0.99681	0.931612	0.996821	5	1
751	H	2023-05-05 04:00:00	0.642961	0.568228	0.643632	0.940598	0.98499	0.976706	0.94035	0.827701	0.996613	2	1
752	J	2023-05-05 04:00:00	0.710885	0.553897	0.611413	0.918188	1	0.976342	0.975041	0.900927	0.990348	2	1
753	H	2023-05-05 04:00:00	0.642961	0.530717	0.602788	0.91093	0.99858	0.972308	0.930158	0.841161	0.994112	3	1
754	I	2023-05-05 04:00:00	0.772656	0.474278	0.63008	0.827755	0.993789	0.982712	0.97813	0.892172	0.997241	4	1
755	J	2023-05-05 04:00:00	0.896081	0.711869	0.546786	0.899934	1	0.973612	0.976565	0.928741	0.989537	3	1
756	K	2023-05-05 04:00:00	0.665022	0.68165	0.640517	0.868595	0.969979	0.959084	0.977268	0.892701	0.986315	4	1
757	H	2023-05-05 04:00:00	0.655443	0.580823	0.729541	0.902441	0.989959	0.976706	0.951887	0.791783	0.995081	3	1
758	L	2023-05-05 04:00:00	0.73643	0.509563	0.59058	0.97053	1	0.995147	0.985173	0.928496	0.996839	2	1
759	N	2023-05-05 04:00:00	0.651379	0.642202	0.69199	0.865252	0.975377	0.956476	0.941775	0.910263	0.994188	4	1
760	F	2023-05-05 04:00:00	0.658636	0.599334	0.632837	0.916055	0.999793	0.993782	0.971931	0.927413	0.999263	3	1
761	M	2023-05-05 04:00:00	0.665893	0.497259	0.607396	0.886189	0.99793	0.973612	0.991092	0.811951	0.989665	4	1
762	N	2023-05-05 04:00:00	0.651379	0.716356	0.634846	0.90618	0.99472	0.982105	0.945366	0.944596	0.994673	3	1
763	O	2023-05-05 04:00:00	0.650218	0.687078	0.618856	0.91115	0.995534	0.985927	0.948195	0.946829	0.995374	3	1
764	N	2023-05-05 04:00:00	0.902816	0.645821	0.745668	0.950495	1	0.971186	0.964688	0.897427	0.998986	2	1
765	P	2023-05-05 04:00:00	0.83135	0.617049	0.564509	0.913393	1	0.991356	0.973415	0.910298	0.999389	3	1
766	Q	2023-05-05 04:00:00	0.764006	0.563397	0.478025	0.930394	1	0.994813	0.978552	0.951862	0.999429	2	1
767	H	2023-05-05 04:00:00	0.668505	0.495992	0.574827	0.885441	1	0.957507	0.939989	0.748144	0.99578	3	1
768	R	2023-05-05 04:00:00	0.636052	0.572571	0.517328	0.868573	0.994942	0.962906	0.977047	0.782509	0.998004	4	1
769	S	2023-05-05 04:00:00	0.707112	0.519697	0.559507	0.829162	0.830316	0.928723	0.895387	0.618548	0.996734	4	1
770	T	2023-05-05 04:00:00	0.753266	0.563487	0.576599	0.962283	1	0.99545	0.948015	0.845348	0.996395	1	1
771	I	2023-05-05 04:00:00	0.767489	0.67869	0.77489	0.661975	1	0.986655	0.986718	0.910555	0.997512	6	1
772	A	2023-05-05 08:00:00	0.618868	0.684002	0.670526	0.851298	0.989367	0.976342	0.98412	0.852932	0.99181	4	1
773	B	2023-05-05 08:00:00	0.728882	0.662288	0.643234	0.86589	0.999261	0.969973	0.960414	0.894358	0.995178	4	1
774	C	2023-05-05 08:00:00	0.849637	0.666956	0.585381	0.928502	0.997308	0.988535	0.964688	0.899785	0.999607	3	1
775	D	2023-05-05 08:00:00	0.684238	0.612707	0.57396	0.847812	0.993937	0.958144	0.987821	0.943864	0.985121	4	1
776	H	2023-05-05 08:00:00	0.639768	0.500299	0.683759	0.897449	1	0.974128	0.950563	0.857623	0.994993	3	1
777	E	2023-05-05 08:00:00	0.790421	0.675859	0.598929	0.915241	1	0.996997	0.995004	0.953616	0.997221	3	1
778	F	2023-05-05 08:00:00	0.695501	0.566021	0.590855	0.745261	1	0.989142	0.982745	0.934088	0.998727	5	1
779	G	2023-05-05 08:00:00	0.609289	0.590449	0.623622	0.898614	1	0.981498	0.96858	0.89183	0.997516	3	1
780	H	2023-05-05 08:00:00	0.69045	0.420715	0.696125	0.889048	1	0.976949	0.964447	0.838168	0.992492	3	1
781	G	2023-05-05 08:00:00	0.679507	0.425058	0.562185	0.877436	0.978557	0.965726	0.965009	0.520843	0.99741	3	1
782	I	2023-05-05 08:00:00	0.769231	0.632249	0.538831		1	0.982712	0.991413	0.932975	0.996779	7	0
783	H	2023-05-05 08:00:00	0.646154	0.568464	0.642931	0.93653	0.984383	0.975523	0.945286	0.826751	0.996629	2	1
784	J	2023-05-05 08:00:00	0.707112	0.552449	0.620038	0.915769	1	0.976342	0.974358	0.900954	0.990273	3	1
785	H	2023-05-05 08:00:00	0.624383	0.498941	0.580734	0.91137	0.998743	0.973825	0.934592	0.840281	0.994236	3	1
786	I	2023-05-05 08:00:00	0.769985	0.460525	0.638154	0.82417	0.991275	0.982712	0.97801	0.892134	0.997432	4	1
787	J	2023-05-05 08:00:00	0.879245	0.706259	0.546471	0.902133	1	0.974158	0.97805	0.927185	0.990335	3	1
788	K	2023-05-05 08:00:00	0.651379	0.682011	0.639729	0.867913	0.970719	0.961116	0.974479	0.891369	0.987636	4	1
789	H	2023-05-05 08:00:00	0.651669	0.577167	0.726154	0.906972	0.987592	0.976039	0.950864	0.792295	0.994843	3	1
790	L	2023-05-05 08:00:00	0.73643	0.525125	0.581128	0.91071	1	0.99545	0.986036	0.929037	0.997201	3	1
791	N	2023-05-05 08:00:00	0.646154	0.619112	0.661901	0.865956	0.986616	0.96239	0.943841	0.908114	0.994965	4	1
792	F	2023-05-05 08:00:00	0.653991	0.616651	0.624803	0.917682	0.999778	0.994268	0.971449	0.926534	0.999364	2	1
793	M	2023-05-05 08:00:00	0.660668	0.486039	0.592431	0.882648	0.997486	0.973309	0.990891	0.811723	0.988616	4	1
794	N	2023-05-05 08:00:00	0.647896	0.706169	0.624803	0.904157	0.994085	0.982499	0.945707	0.942364	0.995005	3	1
795	O	2023-05-05 08:00:00	0.647315	0.678031	0.610547	0.905476	0.995697	0.983743	0.946731	0.94622	0.99548	3	1
796	N	2023-05-05 08:00:00	0.892221	0.64003	0.730151	0.937497	1	0.971186	0.964226	0.89941	0.998958	2	1
797	P	2023-05-05 08:00:00	0.80029	0.603297	0.544699	0.905762	1	0.991356	0.973696	0.910298	0.999021	3	1
798	Q	2023-05-05 08:00:00	0.76894	0.546822	0.471526	0.929118	1	0.995117	0.978793	0.951845	0.999404	2	1
799	H	2023-05-05 08:00:00	0.664731	0.496354	0.569707	0.890983	1	0.958932	0.939407	0.752473	0.995611	3	1
800	R	2023-05-05 08:00:00	0.641277	0.55339	0.475465	0.858522	0.994558	0.961814	0.974459	0.779939	0.998094	4	1
801	S	2023-05-05 08:00:00	0.701016	0.501963	0.52934	0.827161	0.831426	0.928025	0.894123	0.617852	0.996663	4	1
802	T	2023-05-05 08:00:00	0.748041	0.557154	0.569549	0.956939	1	0.99545	0.946771	0.845423	0.996404	2	1
803	I	2023-05-05 08:00:00	0.763425	0.68051	0.763863	0.658676	1	0.987231	0.988945	0.910778	0.997354	6	1
804	A	2023-05-05 12:00:00	0.605806	0.684726	0.673677	0.857779	0.991526	0.9771	0.983744	0.854217	0.990919	4	1
805	B	2023-05-05 12:00:00	0.697242	0.628992	0.62567	0.873983	1	0.970276	0.959953	0.895118	0.995472	3	1
806	C	2023-05-05 12:00:00	0.845573	0.665454	0.582191	0.929998	0.997427	0.988383	0.964066	0.899907	0.99961	3	1
807	D	2023-05-05 12:00:00	0.624122	0.617592	0.578411	0.857994	0.992606	0.960267	1	0.942855	0.987261	4	1
808	H	2023-05-05 12:00:00	0.595936	0.424244	0.654379	0.885639	1	0.973491	0.95295	0.858089	0.994734	3	1
809	E	2023-05-05 12:00:00	0.74688	0.646002	0.575201	0.920233	0.999704	0.997483	0.997051	0.954121	0.996284	2	1
810	F	2023-05-05 12:00:00	0.650218	0.477535	0.539304	0.75342	1	0.988626	0.982665	0.933212	0.998392	5	1
811	G	2023-05-05 12:00:00	0.605806	0.58484	0.613264	0.892237	1	0.980892	0.967336	0.890951	0.997516	3	1
812	H	2023-05-05 12:00:00	0.667837	0.388868	0.674149	0.882472	1	0.974826	0.964347	0.838319	0.992219	3	1
813	G	2023-05-05 12:00:00	0.671785	0.422887	0.567187	0.876358	0.978557	0.96421	0.963965	0.510733	0.997274	3	1
814	I	2023-05-05 12:00:00	0.753556	0.621573	0.530482	0.702001	1	0.983318	0.983126	0.933205	0.996888	5	1
815	H	2023-05-05 12:00:00	0.63193	0.567884	0.643384	0.935606	0.983807	0.97613	0.946008	0.826747	0.99667	2	1
816	J	2023-05-05 12:00:00	0.698984	0.549373	0.612201	0.915769	1	0.976342	0.974358	0.899228	0.990521	3	1
817	H	2023-05-05 12:00:00	0.585776	0.45088	0.538516	0.907521	0.998447	0.974098	0.934331	0.841161	0.994424	3	1
818	I	2023-05-05 12:00:00	0.736168	0.439354	0.653434	0.825819	0.991571	0.982712	0.978251	0.892642	0.997382	4	1
819	J	2023-05-05 12:00:00	0.849927	0.704631	0.539973	0.903673	1	0.974613	0.975803	0.927228	0.990809	3	1
820	H	2023-05-05 12:00:00	0.642671	0.57382	0.722098	0.90486	0.984945	0.97525	0.952148	0.792362	0.994595	3	1
821	L	2023-05-05 12:00:00	0.681277	0.487487	0.538989	0.96921	1	0.995147	0.985995	0.929646	0.997341	2	1
822	N	2023-05-05 12:00:00	0.626125	0.586559	0.635909	0.86589	0.987578	0.962299	0.944644	0.907215	0.99521	4	1
823	F	2023-05-05 12:00:00	0.62148	0.58712	0.591761	0.916648	0.999896	0.994177	0.974439	0.927075	0.999391	3	1
824	M	2023-05-05 12:00:00	0.632511	0.471925	0.584594	0.885639	0.997782	0.973612	0.992115	0.811431	0.988881	4	1
825	N	2023-05-05 12:00:00	0.634543	0.68887	0.607987	0.906686	0.995741	0.982439	0.948938	0.943243	0.99522	3	1
826	O	2023-05-05 12:00:00	0.637446	0.665545	0.598062	0.910227	0.997042	0.985532	0.948998	0.947911	0.99607	3	1
827	N	2023-05-05 12:00:00	0.904935	0.649983	0.746889	0.949461	1	0.971489	0.966052	0.893588	0.999065	2	1
828	P	2023-05-05 12:00:00	0.808418	0.611983	0.552615	0.922674	1	0.991416	0.973456	0.910501	0.999079	3	1
829	Q	2023-05-05 12:00:00	0.753556	0.486854	0.464241	0.92903	1	0.994571	0.978672	0.95201	0.999424	2	1
830	H	2023-05-05 12:00:00	0.643832	0.489839	0.561043	0.874049	1	0.953564	0.937441	0.745235	0.995242	3	1
831	R	2023-05-05 12:00:00	0.603541	0.520746	0.394337	0.836464	0.994173	0.960661	0.974639	0.787583	0.997281	4	1
832	S	2023-05-05 12:00:00	0.702758	0.506668	0.505514	0.821157	0.809524	0.927631	0.893321	0.61748	0.996883	4	1
833	T	2023-05-05 12:00:00	0.741655	0.555887	0.569746	0.958478	1	0.99545	0.944604	0.845741	0.996317	2	1
834	I	2023-05-05 12:00:00	0.755298	0.678759	0.726055	0.663294	1	0.986655	0.988744	0.91132	0.997265	6	1
835	A	2023-05-05 16:00:00	0.605806	0.683278	0.670132	0.860893	0.990861	0.977464	0.983381	0.854826	0.991156	4	1
836	B	2023-05-05 16:00:00	0.69463	0.62284	0.632089	0.87682	1	0.972702	0.958869	0.894542	0.995441	3	1
837	C	2023-05-05 16:00:00	0.833382	0.662758	0.577347	0.931955	0.997856	0.988444	0.96236	0.900022	0.999591	3	1
838	D	2023-05-05 16:00:00	0.638055	0.616507	0.579001	0.863207	0.992458	0.963907	0.986818	0.942967	0.989277	4	1
839	H	2023-05-05 16:00:00	0.588679	0.388017	0.643234	0.882032	1	0.973734	0.951726	0.857428	0.994933	3	1
840	E	2023-05-05 16:00:00	0.731205	0.609992	0.564126	0.908467	0.998817	0.996451	0.995927	0.954227	0.996777	3	1
841	F	2023-05-05 16:00:00	0.623512	0.419268	0.504844	0.75872	1	0.988656	0.982966	0.933583	0.998259	5	1
842	G	2023-05-05 16:00:00	0.587518	0.467944	0.552812	0.894436	1	0.982105	0.967637	0.890883	0.997832	3	1
843	H	2023-05-05 16:00:00	0.661887	0.378553	0.675252	0.880471	1	0.975129	0.963384	0.838252	0.991984	3	1
844	G	2023-05-05 16:00:00	0.661916	0.426506	0.573685	0.872993	0.97693	0.962087	0.963845	0.507453	0.996145	4	1
845	I	2023-05-05 16:00:00	0.74746	0.603297	0.523984	0.70508	1	0.983621	0.982785	0.933626	0.996889	5	1
846	H	2023-05-05 16:00:00	0.63135	0.568427	0.64199	0.93598	0.98394	0.976706	0.945286	0.826988	0.996834	2	1
847	J	2023-05-05 16:00:00	0.691437	0.538335	0.620629	0.918408	1	0.976645	0.975602	0.892758	0.990172	2	1
848	H	2023-05-05 16:00:00	0.575327	0.431446	0.520676	0.903013	0.998817	0.974856	0.934452	0.840755	0.994645	3	1
849	I	2023-05-05 16:00:00	0.727141	0.424335	0.652725	0.818958	0.99512	0.982408	0.978913	0.89439	0.997355	4	1
850	J	2023-05-05 16:00:00	0.805225	0.701916	0.533948	0.905652	1	0.973248	0.976164	0.92751	0.991073	3	1
851	K	2023-05-05 16:00:00	0.602032	0.680021	0.63906	0.869452	0.971162	0.963239	0.974338	0.892208	0.988888	4	1
852	H	2023-05-05 16:00:00	0.640639	0.574164	0.722818	0.905036	0.98706	0.975493	0.946991	0.793276	0.994374	3	1
853	L	2023-05-05 16:00:00	0.637736	0.447858	0.518116	0.968771	1	0.994844	0.986216	0.929781	0.997072	2	1
854	N	2023-05-05 16:00:00	0.629318	0.57572	0.636263	0.867825	0.98777	0.965726	0.944644	0.907807	0.995289	4	1
855	F	2023-05-05 16:00:00	0.588389	0.565044	0.581049	0.914889	1	0.994692	0.968078	0.927549	0.999227	3	1
856	M	2023-05-05 16:00:00	0.626996	0.467401	0.588571	0.903057	0.999556	0.979982	0.993499	0.809439	0.992655	4	1
857	N	2023-05-05 16:00:00	0.640348	0.677868	0.606254	0.907038	0.994942	0.981953	0.947493	0.945949	0.995762	3	1
858	O	2023-05-05 16:00:00	0.646154	0.658488	0.597984	0.910468	0.995209	0.98623	0.950182	0.948046	0.996312	3	1
859	N	2023-05-05 16:00:00	0.906938	0.651973	0.767998	0.950913	1	0.971489	0.967156	0.892504	0.999144	2	1
860	P	2023-05-05 16:00:00	0.791292	0.587373	0.531664	0.92494	1	0.991143	0.973636	0.911042	0.998646	3	1
861	Q	2023-05-05 16:00:00	0.753266	0.486492	0.468297	0.93046	1	0.994177	0.979334	0.95214	0.999333	2	1
862	H	2023-05-05 16:00:00	0.63193	0.486763	0.553954	0.874555	1	0.955323	0.936939	0.757344	0.995133	3	1
863	R	2023-05-05 16:00:00	0.574862	0.504008	0.36354	0.836837	0.993937	0.962451	0.974679	0.800436	0.996808	4	1
864	S	2023-05-05 16:00:00	0.695501	0.478439	0.417297	0.809545	0.81782	0.924022	0.885937	0.617466	0.996361	4	1
865	T	2023-05-05 16:00:00	0.741655	0.561497	0.568447	0.960391	1	0.99545	0.946048	0.845835	0.99635	2	1
866	I	2023-05-05 16:00:00	0.748621	0.679151	0.78316	0.666593	1	0.986624	0.988323	0.909554	0.997118	6	1
867	A	2023-05-05 20:00:00	0.606676	0.682735	0.669739	0.861896	0.991807	0.978799	0.983626	0.85672	0.991948	4	1
868	B	2023-05-05 20:00:00	0.71553	0.65143	0.647172	0.875544	1	0.973916	0.95905	0.89461	0.995307	3	1
869	C	2023-05-05 20:00:00	0.841509	0.665762	0.583294	0.934704	0.997619	0.988596	0.967236	0.899948	0.999597	3	1
870	D	2023-05-05 20:00:00	0.674427	0.622116	0.57971	0.866263	0.988613	0.753109	0.985173	0.943509	0.990019	6	1
871	H	2023-05-05 20:00:00	0.625254	0.410112	0.662728	0.883066	1	0.973794	0.952629	0.855984	0.994923	3	1
872	E	2023-05-05 20:00:00	0.758491	0.608183	0.568848	0.918738	1	0.997574	0.99673	0.954043	0.997549	2	1
873	F	2023-05-05 20:00:00	0.651669	0.45202	0.547338	0.759886	1	0.988323	0.983508	0.933488	0.998634	5	1
874	H	2023-05-05 20:00:00	0.673237	0.389773	0.683956	0.885287	1	0.975736	0.962461	0.83824	0.992043	3	1
875	G	2023-05-05 20:00:00	0.672714	0.425058	0.569983	0.870024	0.967022	0.96421	0.961718	0.512674	0.997174	4	1
876	I	2023-05-05 20:00:00	0.761393	0.602392	0.531033	0.70618	1	0.983621	0.991995	0.933345	0.997181	5	1
877	H	2023-05-05 20:00:00	0.630479	0.569187	0.64525	0.93653	0.984014	0.976676	0.944483	0.826599	0.996655	2	1
878	J	2023-05-05 20:00:00	0.695791	0.533449	0.611925	0.916428	1	0.977252	0.975562	0.88529	0.990683	3	1
879	H	2023-05-05 20:00:00	0.606096	0.453341	0.546944	0.904399	0.998891	0.97522	0.934191	0.839199	0.994591	3	1
880	I	2023-05-05 20:00:00	0.733237	0.433382	0.654813	0.822037	0.992162	0.983015	0.978712	0.89339	0.997645	4	1
881	J	2023-05-05 20:00:00	0.785486	0.704269	0.538162	0.901913	1	0.975827	0.97803	0.926935	0.991403	3	1
882	K	2023-05-05 20:00:00	0.620029	0.682192	0.643864	0.868265	0.970571	0.964301	0.975482	0.891277	0.989142	4	1
883	H	2023-05-05 20:00:00	0.646444	0.577783	0.730683	0.904442	0.987652	0.976524	0.94956	0.792665	0.99442	3	1
884	L	2023-05-05 20:00:00	0.660958	0.431935	0.533475	0.968331	1	0.994844	0.986176	0.929849	0.997493	2	1
885	N	2023-05-05 20:00:00	0.646444	0.608255	0.666549	0.86998	0.988672	0.966909	0.947052	0.90791	0.995046	4	1
886	F	2023-05-05 20:00:00	0.613933	0.578163	0.601055	0.91645	0.999793	0.994146	0.971971	0.928022	0.999388	3	1
887	M	2023-05-05 20:00:00	0.637155	0.482059	0.599795	0.905828	0.999556	0.980588	0.99376	0.819382	0.992779	4	1
888	N	2023-05-05 20:00:00	0.66299	0.692398	0.616612	0.908555	0.993907	0.981832	0.947373	0.946896	0.995788	3	1
889	O	2023-05-05 20:00:00	0.672859	0.671154	0.606057	0.914185	0.995312	0.986564	0.951405	0.948182	0.996312	3	1
890	N	2023-05-05 20:00:00	0.914427	0.656859	0.772054	0.951221	1	0.970579	0.967497	0.889706	0.999183	3	1
891	P	2023-05-05 20:00:00	0.804354	0.592621	0.534932	0.922344	1	0.991689	0.973897	0.910501	0.998992	3	1
892	Q	2023-05-05 20:00:00	0.757329	0.507175	0.471763	0.930306	1	0.994662	0.977448	0.952029	0.999402	2	1
893	H	2023-05-05 20:00:00	0.657765	0.474278	0.558286	0.869013	1	0.95505	0.938765	0.736102	0.995526	4	1
894	R	2023-05-05 20:00:00	0.590943	0.533196	0.431317	0.831053	0.993641	0.961601	0.974419	0.800233	0.99818	4	1
895	S	2023-05-05 20:00:00	0.675762	0.388144	0.228733	0.791049	0.86047	0.925356	0.894324	0.62553	0.996081	4	1
896	T	2023-05-05 20:00:00	0.748621	0.567106	0.578371	0.960633	1	0.99545	0.944343	0.845301	0.996112	2	1
897	I	2023-05-05 20:00:00	0.750653	0.678426	0.767801	0.669013	1	0.986503	0.988303	0.90745	0.997033	6	1
898	A	2023-05-06	0.613062	0.685631	0.672495	0.861896	0.991807	0.978799	0.983626	0.855435	0.991996	4	1
899	B	2023-05-06	0.742235	0.671335	0.655797	0.875544	1	0.973916	0.95905	0.893896	0.995394	3	0
900	C	2023-05-06	0.856894	0.673253	0.594991	0.934704	0.997619	0.988596	0.967236	0.89942	0.99959	3	1
901	D	2023-05-06	0.693933	0.625011	0.581679	0.866263	0.988613	0.753109	0.985173	0.944068	0.99086	6	1
902	H	2023-05-06	0.650508	0.448148	0.687539	0.883066	1	0.973794	0.952629	0.854508	0.994968	3	1
903	E	2023-05-06	0.794194	0.659211	0.597058	0.918738	1	0.997574	0.995245	0.953545	0.997709	2	1
904	F	2023-05-06	0.681277	0.513001	0.584436	0.759886	1	0.988323	0.983508	0.93496	0.998667	5	1
905	G	2023-05-06	0.587808	0.525668	0.602591	0.894436	1	0.982105	0.967637	0.895212	0.99754	3	1
906	H	2023-05-06	0.684761	0.412935	0.698212	0.885287	1	0.975736	0.962461	0.838385	0.992474	3	1
907	G	2023-05-06	0.674601	0.424696	0.580813	0.870024	0.967022	0.96421	0.961718	0.497454	0.996361	4	1
908	I	2023-05-06	0.769231	0.618497	0.539579	0.70618	1	0.983621	0.991995	0.933531	0.997094	5	1
909	H	2023-05-06	0.630189	0.567342	0.646908	0.93653	0.984014	0.976676	0.944483	0.82699	0.996678	2	1
910	J	2023-05-06	0.707112	0.525125	0.611098	0.916428	1	0.977252	0.975562	0.873099	0.990925	3	1
911	H	2023-05-06	0.628157	0.497222	0.580419	0.904399	0.998891	0.97522	0.934191	0.837778	0.994378	3	1
912	I	2023-05-06	0.743425	0.451658	0.659578	0.822037	0.992162	0.983015	0.978712	0.893792	0.997717	4	1
913	J	2023-05-06	0.858636	0.709878	0.547338	0.901913	1	0.975827	0.97803	0.929115	0.989296	3	1
914	K	2023-05-06	0.635994	0.684364	0.649614	0.868265	0.970571	0.964301	0.975482	0.890022	0.989586	4	1
915	H	2023-05-06	0.644702	0.579755	0.730789	0.904442	0.987652	0.976524	0.94956	0.7945	0.994337	3	1
916	L	2023-05-06	0.681277	0.459078	0.572858	0.968331	1	0.994844	0.986176	0.930187	0.99685	2	1
917	N	2023-05-06	0.666183	0.621555	0.678442	0.86998	0.988672	0.966909	0.947052	0.905965	0.994755	4	1
918	F	2023-05-06	0.625254	0.512531	0.616572	0.91645	0.999793	0.994146	0.971971	0.930052	0.99902	3	1
919	M	2023-05-06	0.654282	0.486582	0.600898	0.905828	0.999556	0.980588	0.99376	0.8108	0.991519	4	1
920	N	2023-05-06	0.688244	0.708901	0.623582	0.908555	0.993907	0.981832	0.947373	0.946761	0.995658	3	1
921	O	2023-05-06	0.697533	0.680383	0.607672	0.914185	0.995312	0.986564	0.951405	0.94879	0.996204	3	1
922	N	2023-05-06	0.9218	0.659573	0.781624	0.951221	1	0.970579	0.967497	0.888891	0.999209	3	1
923	P	2023-05-06	0.819448	0.606554	0.551158	0.922344	1	0.991689	0.973897	0.910366	0.999453	3	1
924	H	2023-05-06	0.670537	0.478259	0.566163	0.869013	1	0.95505	0.938765	0.743138	0.995506	4	1
925	R	2023-05-06	0.612424	0.555706	0.490351	0.831053	0.993641	0.961601	0.974419	0.799421	0.998522	4	1
926	S	2023-05-06	0.686792	0.411306	0.314784	0.791049	0.86047	0.925356	0.894324	0.623067	0.99626	4	1
927	T	2023-05-06	0.749492	0.560592	0.571873	0.960633	1	0.99545	0.944343	0.84474	0.996363	2	1
928	I	2023-05-06	0.748041	0.678081	0.768589	0.669013	1	0.986503	0.988303	0.903066	0.996744	6	1
929	A	2023-05-06 04:00:00	0.624093	0.688888	0.678796	0.864508	0.991763	0.978951	0.983578	0.855773	0.992776	4	1
930	B	2023-05-06 04:00:00	0.754717	0.674954	0.656467	0.87726	0.999704	0.971489	0.962721	0.893765	0.995583	3	1
931	C	2023-05-06 04:00:00	0.865022	0.677451	0.601331	0.939455	0.996835	0.988444	0.964527	0.897972	0.999588	3	1
932	D	2023-05-06 04:00:00	0.707721	0.626278	0.583018	0.860875	0.993197	0.794662	0.984872	0.943569	0.987844	6	1
933	H	2023-05-06 04:00:00	0.669956	0.481118	0.702662	0.893468	1	0.973673	0.951867	0.854124	0.994912	3	1
934	E	2023-05-06 04:00:00	0.822642	0.678392	0.614902	0.920145	1	0.997634	0.996409	0.953064	0.997851	2	1
935	F	2023-05-06 04:00:00	0.714659	0.59244	0.614406	0.750429	1	0.988262	0.983688	0.935684	0.9986	5	1
936	G	2023-05-06 04:00:00	0.616836	0.582125	0.619802	0.893116	1	0.981498	0.968801	0.895686	0.997621	3	1
937	H	2023-05-06 04:00:00	0.69312	0.423249	0.704277	0.896965	1	0.977555	0.96236	0.838924	0.993187	3	1
938	G	2023-05-06 04:00:00	0.681597	0.431211	0.587705	0.878293	0.970719	0.965726	0.963143	0.507333	0.997429	3	1
939	I	2023-05-06 04:00:00	0.776197	0.61723	0.54084	0.709479	1	0.983925	0.992135	0.933444	0.997091	5	1
940	H	2023-05-06 04:00:00	0.62061	0.570816	0.65434	0.941676	0.983718	0.976554	0.940069	0.827462	0.996639	2	1
941	J	2023-05-06 04:00:00	0.711176	0.519697	0.619132	0.922146	1	0.978769	0.975281	0.866616	0.991424	2	1
942	H	2023-05-06 04:00:00	0.639187	0.528762	0.600189	0.912756	0.998846	0.974826	0.933629	0.836628	0.994305	3	1
943	I	2023-05-06 04:00:00	0.753991	0.469573	0.665328	0.822784	0.991571	0.983621	0.978592	0.894081	0.99779	4	1
944	J	2023-05-06 04:00:00	0.896662	0.716754	0.549031	0.898395	1	0.97158	0.976345	0.93161	0.988854	3	1
945	K	2023-05-06 04:00:00	0.653991	0.686535	0.650244	0.868331	0.970275	0.964756	0.975783	0.888754	0.989502	4	1
946	H	2023-05-06 04:00:00	0.651669	0.583103	0.728438	0.901495	0.987415	0.975614	0.949399	0.794713	0.993782	3	1
947	L	2023-05-06 04:00:00	0.707402	0.502325	0.598456	0.962613	1	0.995147	0.986116	0.929849	0.997201	2	1
948	N	2023-05-06 04:00:00	0.683019	0.620867	0.679978	0.877348	0.989337	0.967789	0.947112	0.904354	0.995013	3	1
949	F	2023-05-06 04:00:00	0.658345	0.564446	0.636224	0.913723	0.999896	0.993691	0.972713	0.92951	0.999207	3	1
950	M	2023-05-06 04:00:00	0.665312	0.490201	0.604797	0.89945	0.999113	0.977555	0.991653	0.810652	0.992198	4	1
951	N	2023-05-06 04:00:00	0.596226	0.749724	0.643195	0.918078	0.996332	0.985502	0.948356	0.999933	0.999669	2	1
952	O	2023-05-06 04:00:00	0.719594	0.685631	0.60523	0.91667	0.993138	0.985168	0.951827	0.948723	0.996111	3	1
953	N	2023-05-06 04:00:00	0.914659	0.653602	0.806081	0.956917	1	0.971186		0.892347	0.999212	3	0
954	P	2023-05-06 04:00:00	0.824964	0.613611	0.560767	0.925577	1	0.991902	0.97476	0.910028	0.999367	3	1
955	Q	2023-05-06 04:00:00	0.769231	0.540705	0.482711	0.931383	1	0.994207	0.977208	0.951661	0.999422	2	1
956	H	2023-05-06 04:00:00	0.679536	0.489297	0.568919	0.885683	1	0.957416	0.939106	0.755111	0.995461	3	1
957	R	2023-05-06 04:00:00	0.654253	0.56935	0.560334	0.851858	0.994247	0.959539	0.974318	0.796986	0.998494	4	1
958	S	2023-05-06 04:00:00	0.690276	0.428677	0.382798	0.812646	0.865543	0.925447	0.895628	0.622533	0.996325	4	1
959	T	2023-05-06 04:00:00	0.737881	0.551906	0.570573	0.957686	1	0.99545	0.947633	0.844158	0.996458	2	1
960	I	2023-05-06 04:00:00	0.748041	0.672681	0.777253	0.67737	1	0.986109	0.987942	0.897377	0.996588	5	1
961	A	2023-05-06 08:00:00	0.624383	0.693231	0.683916	0.859787	0.991807	0.978132	0.984312	0.85787	0.992515	4	1
962	B	2023-05-06 08:00:00	0.725689	0.653602	0.637366	0.874489	1	0.963603	0.965009	0.894288	0.995867	3	1
963	C	2023-05-06 08:00:00	0.853701	0.672059	0.592116	0.926303	0.994528	0.988474	0.956763	0.896985	0.999625	3	1
964	D	2023-05-06 08:00:00	0.652946	0.626278	0.585027	0.866373	0.993493	0.760995	0.986056	0.943989	0.989846	6	1
965	H	2023-05-06 08:00:00	0.629028	0.441272	0.67923	0.891775	1	0.973552	0.950623	0.855781	0.994711	3	1
966	E	2023-05-06 08:00:00	0.826415	0.672421	0.601532	0.91744	1	0.997361	0.99695	0.953073	0.997848	3	1
967	F	2023-05-06 08:00:00	0.718433	0.591173	0.588965	0.743875	1	0.98714	0.982264	0.934075	0.998341	5	1
968	G	2023-05-06 08:00:00	0.613353	0.600221	0.622164	0.895316	1	0.981802	0.969282	0.896971	0.997586	3	1
969	H	2023-05-06 08:00:00	0.691814	0.408954	0.690887	0.893556	1	0.977252	0.964246	0.839526	0.992796	3	1
970	G	2023-05-06 08:00:00	0.660929	0.43103	0.596723	0.872641	0.977669	0.962087	0.960715	0.496069	0.996031	4	1
971	I	2023-05-06 08:00:00	0.756749	0.618859	0.537847	0.701781	1	0.984835	0.984009	0.934955	0.997017	5	1
972	H	2023-05-06 08:00:00	0.63164	0.568699	0.649327	0.937453	0.985064	0.976008	0.946189	0.826608	0.996603	2	1
973	J	2023-05-06 08:00:00	0.706821	0.514811	0.608696	0.916648	1	0.978769	0.974278	0.859961	0.991552	3	1
974	H	2023-05-06 08:00:00	0.61016	0.507392	0.574551	0.911546	0.998388	0.97525	0.931422	0.83717	0.994587	3	1
975	I	2023-05-06 08:00:00	0.746734	0.453649	0.660484	0.819705	0.992902	0.983925	0.978151	0.895462	0.997742	4	1
976	J	2023-05-06 08:00:00	0.887663	0.714221	0.546235	0.901034	1	0.971884	0.976485	0.931388	0.989536	3	1
977	K	2023-05-06 08:00:00	0.646444	0.686535	0.64926	0.86943	0.969536	0.96421	0.975402	0.888202	0.989304	4	1
978	H	2023-05-06 08:00:00	0.64209	0.578108	0.729025	0.904157	0.986528	0.976342	0.949198	0.79623	0.994368	3	1
979	L	2023-05-06 08:00:00	0.707402	0.536706	0.593336	0.967451	1	0.99545	0.986056	0.929984	0.997458	1	1
980	N	2023-05-06 08:00:00	0.646444	0.676492	0.716604	0.880009	0.991378	0.97067	0.948215	0.902433	0.996279	3	1
981	F	2023-05-06 08:00:00	0.643832	0.554892	0.614249	0.913086	0.999852	0.993995	0.972151	0.929849	0.999322	3	1
982	M	2023-05-06 08:00:00	0.665602	0.496897	0.598732	0.875786	0.997782	0.974219	0.991573	0.81348	0.989917	4	1
983	O	2023-05-06 08:00:00	0.704499	0.67405	0.5842	0.911832	0.99549	0.985987	0.951646	0.948723	0.996498	3	1
984	N	2023-05-06 08:00:00	0.889811	0.648716	0.824709	0.943325	1	0.971186	0.962481	0.896233	0.999187	4	1
985	P	2023-05-06 08:00:00	0.812192	0.611621	0.556868	0.919881	1	0.991811	0.973616	0.910366	0.999399	3	1
986	Q	2023-05-06 08:00:00	0.76894	0.50124	0.468573	0.923048	1	0.994844	0.976606	0.951806	0.999446	2	1
987	H	2023-05-06 08:00:00	0.658055	0.494906	0.565769	0.886914	1	0.957871	0.938364	0.767694	0.995625	3	1
988	R	2023-05-06 08:00:00	0.656139	0.537322	0.468258	0.853926	0.993271	0.958902	0.9747	0.794415	0.998465	4	1
989	S	2023-05-06 08:00:00	0.69463	0.442973	0.389887	0.812118	0.881322	0.924477	0.900122	0.621133	0.996131	4	1
990	T	2023-05-06 08:00:00	0.7373	0.54304	0.566635	0.961447	1	0.99545	0.947774	0.844307	0.996541	2	1
991	I	2023-05-06 08:00:00	0.748041	0.669449	0.770164	0.680229	1	0.98623	0.986617	0.891106	0.996451	5	1
992	A	2023-05-06 12:00:00	0.613062	0.691964	0.682341	0.861495	0.992029	0.978465	0.984224	0.858885	0.992268	4	1
993	B	2023-05-06 12:00:00	0.655152	0.574887	0.599795	0.880031	1	0.969669	0.966413	0.895497	0.996092	3	1
994	C	2023-05-06 12:00:00	0.840348	0.665762	0.583688	0.935408	0.997737	0.988353	0.963223	0.899779	0.999583	3	1
995	D	2023-05-06 12:00:00	0.587779	0.62103	0.583412	0.871212	0.993937	0.969366	0.98752	0.944368	0.991114	4	1
996	H	2023-05-06 12:00:00	0.59971	0.395617	0.66521	0.884473	1	0.973248	0.951706	0.857415	0.994535	3	1
997	E	2023-05-06 12:00:00	0.770392	0.645459	0.569297	0.942292	1	0.997756	0.99679	0.953834	0.997584	2	1
998	F	2023-05-06 12:00:00	0.665312	0.505401	0.532294	0.738465	1	0.986806	0.981321	0.933238	0.998174	5	1
999	G	2023-05-06 12:00:00	0.591292	0.551002	0.593297	0.893776	1	0.982712	0.969343	0.89758	0.997668	3	1
1000	H	2023-05-06 12:00:00	0.67254	0.385973	0.679112	0.88377	1	0.976039	0.962922	0.83966	0.99251	3	1
1001	G	2023-05-06 12:00:00	0.655036	0.432477	0.590501	0.871784	0.957557	0.96421	0.956923	0.502658	0.997237	4	1
1002	I	2023-05-06 12:00:00	0.737591	0.612526	0.522054	0.7064	1	0.984228	0.984089	0.934885	0.997194	5	1
1003	H	2023-05-06 12:00:00	0.6209	0.569893	0.65115	0.937453	0.984369	0.976645	0.945246	0.826914	0.996771	2	1
1004	J	2023-05-06 12:00:00	0.680406	0.509563	0.612004	0.913349	1	0.979072	0.97472	0.854878	0.99155	3	1
1005	H	2023-05-06 12:00:00	0.587518	0.465139	0.535996	0.910996	0.997959	0.975432	0.933107	0.83744	0.994398	3	1
1006	I	2023-05-06 12:00:00	0.715152	0.424515	0.655285	0.815637	0.995859	0.983925	0.978672	0.897433	0.997698	4	1
1007	J	2023-05-06 12:00:00	0.845864	0.71024	0.536665	0.898395	1	0.973946	0.976706	0.930368	0.989992	3	1
1008	K	2023-05-06 12:00:00	0.616836	0.684545	0.645794	0.866835	0.969536	0.964149	0.975683	0.889314	0.989693	4	1
1009	H	2023-05-06 12:00:00	0.638316	0.579773	0.716013	0.89912	0.987267	0.9734	0.951987	0.797021	0.994424	3	1
1010	L	2023-05-06 12:00:00	0.649347	0.497078	0.551591	0.966791	1	0.99545	0.985895	0.93066	0.997528	1	1
1011	N	2023-05-06 12:00:00	0.606676	0.693647	0.764256	0.886013	0.995711	0.973127	0.948356	0.901629	0.99732	3	1
1012	F	2023-05-06 12:00:00	0.599419	0.540271	0.592903	0.911062	1		0.983929	0.92951	0.999363	7	0
1013	M	2023-05-06 12:00:00	0.626705	0.492011	0.590147	0.882604	0.998521	0.976645	0.992015	0.810865	0.991146	4	1
1014	O	2023-05-06 12:00:00	0.666183	0.65523	0.568919	0.916165	0.997382	0.985714	0.952489	0.949061	0.996524	3	1
1015	N	2023-05-06 12:00:00	0.857939	0.633878	0.705577	0.93598	1	0.969669	0.962481	0.900759	0.998049	3	1
1016	P	2023-05-06 12:00:00	0.807257	0.609087	0.550488	0.907675	1	0.990234	0.974479	0.910636	0.999227	3	1
1017	Q	2023-05-06 12:00:00	0.713208	0.525759	0.469951	0.930592	1	0.995541	0.978171	0.952529	0.999458	2	1
1018	H	2023-05-06 12:00:00	0.615094	0.492735	0.562618	0.886563	1	0.959873	0.94021	0.767085	0.995411	3	1
1019	S	2023-05-06 12:00:00	0.698694	0.458354	0.390792	0.814075	0.878675	0.925265	0.899681	0.619631	0.996317	4	1
1020	T	2023-05-06 12:00:00	0.731495	0.555887	0.574709	0.960655	1	0.99545	0.945426	0.845105	0.996273	2	1
1021	I	2023-05-06 12:00:00	0.74775	0.6626	0.765438	0.687266	1	0.985259	0.986938	0.885613	0.99643	5	1
1022	A	2023-05-06 16:00:00	0.613353	0.687259	0.667376	0.878329	0.992694	0.977919	0.983648	0.860576	0.992895	3	1
1023	B	2023-05-06 16:00:00	0.61074	0.523497	0.601646	0.881372	1	0.971793	0.967276	0.895924	0.99603	3	1
1024	C	2023-05-06 16:00:00	0.833091	0.666956	0.582467	0.932615	0.99682	0.988232	0.956742	0.899014	0.999612	3	1
1025	D	2023-05-06 16:00:00	0.633817	0.619945	0.580852	0.868639	0.995711	0.96239	0.98742	0.945451	0.991067	4	1
1026	H	2023-05-06 16:00:00	0.577649	0.372437	0.650638	0.880998	1	0.9734	0.95279	0.854776	0.994541	3	1
1027	E	2023-05-06 16:00:00	0.735559	0.616507	0.559861	0.933165	1	0.997907	0.997051	0.954185	0.997228	2	1
1028	F	2023-05-06 16:00:00	0.653991	0.451477	0.509609	0.709083	1	0.987291	0.980779	0.934388	0.998068	5	1
1029	G	2023-05-06 16:00:00	0.580261	0.494906	0.579868	0.889158	1	0.982408	0.968981	0.898054	0.997703	3	1
1030	H	2023-05-06 16:00:00	0.66627	0.375839	0.670684	0.886101	1	0.976039	0.962802	0.839431	0.992639	3	1
1031	G	2023-05-06 16:00:00	0.66299	0.44442	0.626575	0.879371	0.96924	0.967243	0.963925	0.499226	0.997338	3	1
1032	I	2023-05-06 16:00:00	0.730334	0.597326	0.518234	0.702441	1	0.984531	0.982605	0.935353	0.99711	5	1
1033	H	2023-05-06 16:00:00	0.605225	0.557896	0.641675	0.935606	0.987563	0.976736	0.944644	0.826217	0.996864	2	1
1034	J	2023-05-06 16:00:00	0.673149	0.512097	0.615548	0.927425	1	0.978465	0.97488	0.853551	0.991256	2	1
1035	H	2023-05-06 16:00:00	0.569811	0.441326	0.535247	0.911876	0.998684	0.975645	0.932465	0.837373	0.994604	3	1
1036	I	2023-05-06 16:00:00	0.710247	0.410582	0.653158	0.814251	0.994972	0.983925	0.979174	0.89762	0.997822	4	1
1037	J	2023-05-06 16:00:00	0.82061	0.71024	0.534145	0.898395	1	0.972126	0.976285	0.931231	0.989799	3	1
1038	K	2023-05-06 16:00:00	0.613353	0.684545	0.644731	0.863031	0.969831	0.962208	0.973897	0.888487	0.987202	4	1
1039	H	2023-05-06 16:00:00	0.635994	0.568771	0.712213	0.903783	0.988731	0.976463	0.942939	0.797327	0.994847	3	1
1040	L	2023-05-06 16:00:00	0.608708	0.454554	0.525599	0.964152	1	0.995147	0.986678	0.930863	0.997481	2	1
1041	N	2023-05-06 16:00:00	0.573295	0.697845	0.820731	0.88874	0.998092	0.974189	0.94968	0.900418	0.998141	4	1
1042	F	2023-05-06 16:00:00	0.584906	0.496716	0.585499	0.903805	1		0.983287	0.930187	0.999364	7	0
1043	M	2023-05-06 16:00:00	0.612772	0.49382	0.596487	0.897009	0.999261	0.979982	0.992817	0.811572	0.99286	4	1
1044	O	2023-05-06 16:00:00	0.651089	0.644011	0.574118	0.922037	0.997338	0.985199	0.953893	0.948993	0.996621	2	1
1045	N	2023-05-06 16:00:00	0.827199	0.62103	0.630159	0.931361	1	0.971186	0.962481	0.90171	0.998598	2	1
1046	P	2023-05-06 16:00:00	0.793904	0.588459	0.528552	0.910666	1	0.990567	0.973315	0.91111	0.998863	3	1
1047	Q	2023-05-06 16:00:00	0.722496	0.449288	0.459318	0.92947	1	0.994995	0.980057	0.95232	0.999446	2	1
1048	H	2023-05-06 16:00:00	0.604935	0.484411	0.560649	0.891357	1	0.959994	0.941012	0.761876	0.995557	3	1
1049	R	2023-05-06 16:00:00	0.547373	0.497765	0.253702	0.839367	0.992724	0.957962	0.968179	0.810448	0.995335	4	1
1050	S	2023-05-06 16:00:00	0.697533	0.469754	0.402489	0.819155	0.877862	0.924568	0.903132	0.619164	0.996103	4	1
1051	T	2023-05-06 16:00:00	0.733527	0.551725	0.576126	0.958346	1	0.99545	0.945507	0.845037	0.996388	2	1
1052	I	2023-05-06 16:00:00	0.742816	0.661197	0.784735	0.695404	1	0.981893	0.986477	0.881933	0.996302	5	1
1053	A	2023-05-06 20:00:00	0.605806	0.682373	0.664619	0.878329	0.992694	0.977919	0.983648	0.861117	0.992425	3	1
1054	B	2023-05-06 20:00:00	0.649347	0.614516	0.649968	0.881372	1	0.971793	0.967276	0.895267	0.995859	3	1
1055	C	2023-05-06 20:00:00	0.832801	0.666649	0.583176	0.932615	0.99682	0.988232	0.956742	0.898798	0.999625	3	1
1056	D	2023-05-06 20:00:00	0.673295	0.622659	0.583845	0.868639	0.995711	0.96239	0.98742	0.946506	0.991724	4	1
1057	H	2023-05-06 20:00:00	0.615094	0.405407	0.679978	0.880998	1	0.9734	0.95279	0.855927	0.994859	3	1
1058	E	2023-05-06 20:00:00	0.750943	0.61524	0.570656	0.928414	1	0.997938	0.99687	0.954026	0.997814	2	1
1059	F	2023-05-06 20:00:00	0.671698	0.484954	0.546314	0.723774	1	0.987352	0.982183	0.934983	0.998492	5	1
1060	G	2023-05-06 20:00:00	0.551234	0.464325	0.594124	0.889158	1	0.981498	0.969684	0.900895	0.997575	3	1
1061	H	2023-05-06 20:00:00	0.677475	0.385249	0.67667	0.886101	1	0.976039	0.962802	0.838663	0.993231	3	1
1062	G	2023-05-06 20:00:00	0.635936	0.401354	0.523393	0.867517	0.985211	0.961783	0.963945	0.487744	0.997022	4	1
1063	I	2023-05-06 20:00:00	0.744557	0.607097	0.528198	0.703321	1	0.985138	0.994021	0.935566	0.997218	5	1
1064	H	2023-05-06 20:00:00	0.613062	0.565206	0.647007	0.935606	0.987563	0.976736	0.944644	0.826849	0.996991	2	1
1065	J	2023-05-06 20:00:00	0.68418	0.51264	0.61673	0.927425	1	0.979072	0.976184	0.851078	0.991284	2	1
1066	H	2023-05-06 20:00:00	0.608708	0.462697	0.556553	0.911876	0.998684	0.975645	0.932465	0.835817	0.994583	3	1
1067	I	2023-05-06 20:00:00	0.71582	0.414201	0.652725	0.814251	0.994972	0.983925	0.979174	0.896149	0.997912	4	1
1068	J	2023-05-06 20:00:00	0.84209	0.710602	0.540328	0.898395	1	0.973794	0.977388	0.931057	0.99026	3	1
1069	K	2023-05-06 20:00:00	0.627866	0.687078	0.651465	0.864108	0.968205	0.962451	0.973476	0.887778	0.988204	4	1
1070	H	2023-05-06 20:00:00	0.634833	0.574109	0.721349	0.903783	0.988731	0.976463	0.942939	0.798964	0.99482	3	1
1071	L	2023-05-06 20:00:00	0.629028	0.452382	0.542927	0.963272	1	0.994844	0.985795	0.930525	0.997516	2	1
1072	N	2023-05-06 20:00:00	0.544848	0.703454	0.903434	0.88874	0.998092	0.974189	0.94968	0.899881	0.998382	5	1
1073	F	2023-05-06 20:00:00	0.625254	0.516403	0.605703	0.903805	1		0.983287	0.93039	0.999211	7	0
1074	M	2023-05-06 20:00:00	0.636284	0.499068	0.60334	0.897009	0.999261	0.979982	0.992817	0.810447	0.993509	4	1
1075	O	2023-05-06 20:00:00	0.680116	0.665183	0.59696	0.922037	0.997338	0.985199	0.953893	0.948993	0.996545	2	1
1076	N	2023-05-06 20:00:00	0.823948	0.62483	0.63268	0.934946	1	0.971186	0.963925	0.900689	0.998646	2	1
1077	P	2023-05-06 20:00:00	0.81103	0.598954	0.539973	0.910666	1	0.990567	0.973315	0.910501	0.999133	3	1
1078	Q	2023-05-06 20:00:00	0.749492	0.581112	0.492242	0.931339	1	0.994874	0.979796	0.952404	0.999418	2	1
1079	H	2023-05-06 20:00:00	0.637155	0.48242	0.56695	0.885485	1	0.962087	0.94326	0.757614	0.995706	3	1
1080	R	2023-05-06 20:00:00	0.550044	0.511011	0.345857	0.839367	0.992724	0.957962	0.968179	0.808351	0.99262	4	1
1081	S	2023-05-06 20:00:00	0.697242	0.482059	0.416273	0.819155	0.877862	0.924568	0.903132	0.61957	0.996207	4	1
1082	T	2023-05-06 20:00:00	0.722496	0.534535	0.56124	0.956697	1	0.99545	0.947032	0.84409	0.996526	2	1
1083	I	2023-05-06 20:00:00	0.740203	0.664103	0.785917	0.695404	1	0.984107	0.986457	0.884449	0.995735	5	1
1084	A	2023-05-07	0.616546	0.682735	0.660681	0.886642	0.992768	0.971065	0.984105	0.860306	0.992924	3	1
1085	B	2023-05-07	0.704499	0.665002	0.666824	0.881944	1	0.971793	0.965691	0.894162	0.995826	3	0
1086	C	2023-05-07	0.849347	0.671751	0.593297	0.932417	0.996466	0.988232	0.95897	0.898561	0.999618	3	1
1087	D	2023-05-07	0.687141	0.625373	0.585027	0.878381	0.995711	0.969366	0.987661	0.947253	0.991957	3	1
1088	H	2023-05-07	0.643541	0.447424	0.695298	0.886563	1	0.974522	0.950342	0.855877	0.994896	3	1
1089	E	2023-05-07	0.786357	0.657764	0.60176	0.928414	1	0.997938	0.99687	0.953486	0.997795	2	1
1090	F	2023-05-07	0.699274	0.544125	0.580655	0.723774	1	0.987352	0.982183	0.936174	0.998583	5	1
1091	G	2023-05-07	0.586357	0.56783	0.623937	0.887838	1	0.981498	0.969684	0.901774	0.99761	3	1
1092	H	2023-05-07	0.6791	0.404068	0.695928	0.88377	1	0.977555	0.963945	0.837667	0.992743	3	1
1093	G	2023-05-07	0.655327	0.414744	0.564863	0.867517	0.985211	0.961783	0.963945	0.487958	0.996207	4	1
1094	I	2023-05-07	0.757329	0.615964	0.531979	0.703321	1	0.985138	0.994021	0.935329	0.997383	5	1
1095	H	2023-05-07	0.609869	0.567939	0.650315	0.938267	0.986084	0.977131	0.947333	0.826783	0.997037	2	1
1096	J	2023-05-07	0.68418	0.512821	0.620747	0.927425	1	0.979072	0.976184	0.851596	0.991531	2	1
1097	H	2023-05-07	0.635414	0.496408	0.571952	0.910776	0.999172	0.976372	0.933167	0.834937	0.994369	3	1
1098	I	2023-05-07	0.727634	0.437725	0.659066	0.816077	0.992458	0.983621	0.978151	0.897487	0.997915	4	1
1099	J	2023-05-07	0.870827	0.710783	0.543951	0.900154	1	0.973794	0.977388	0.930494	0.989837	3	1
1100	K	2023-05-07	0.648766	0.688526	0.656939	0.864108	0.968205	0.962451	0.973476	0.886657	0.988993	4	1
1101	H	2023-05-07	0.632801	0.577439	0.727391	0.903387	0.989678	0.977586	0.943019	0.801178	0.994851	3	1
1102	L	2023-05-07	0.649347	0.493459	0.585066	0.963272	1	0.994844	0.985795	0.930796	0.997248	2	1
1103	N	2023-05-07	0.544848	0.7262	0.929151	0.888894	0.998743	0.974098	0.948496	0.900028	0.998565	5	1
1104	F	2023-05-07	0.647315	0.512839	0.616415	0.90552	1	0.993752	0.981662	0.930863	0.998926	3	1
1105	M	2023-05-07	0.643832	0.49744	0.601646	0.904838	0.999852	0.981802	0.993138	0.815356	0.994492	4	1
1106	O	2023-05-07	0.70508	0.680745	0.602079	0.922564	0.994898	0.986321	0.953171	0.94879	0.996538	2	1
1107	N	2023-05-07	0.84209	0.643288	0.693014	0.934946	1	0.971186	0.963925	0.893886	0.998702	2	1
1108	P	2023-05-07	0.822351	0.611983	0.552497	0.907675	1	0.990567	0.974659	0.91023	0.999141	3	1
1109	Q	2023-05-07	0.737591	0.505655	0.471526	0.931339	1	0.994874	0.979796	0.951886	0.99942	2	1
1110	H	2023-05-07	0.645573	0.479163	0.574039	0.885485	1	0.962087	0.94326	0.744964	0.995792	3	1
1111	R	2023-05-07	0.57434	0.534444	0.455261	0.826435	0.990905	0.955475	0.966594	0.800098	0.996125	4	1
1112	S	2023-05-07	0.690276	0.485859	0.406585	0.815835	0.878276	0.926418	0.899741	0.622486	0.996343	4	1
1113	T	2023-05-07	0.72598	0.533811	0.571597	0.956697	1	0.99545	0.947032	0.843819	0.99645	2	1
1114	I	2023-05-07	0.741074	0.668768	0.781979	0.698922	1	0.984107	0.986457	0.887798	0.995167	5	1
1115	A	2023-05-07 04:00:00	0.624093	0.686897	0.668163	0.883985	0.992295	0.976706	0.982563	0.857735	0.992603	3	1
1116	B	2023-05-07 04:00:00	0.731785	0.676583	0.664107	0.881504	1	0.972399	0.965972	0.894165	0.995849	3	1
1117	C	2023-05-07 04:00:00	0.860958	0.67595	0.598614	0.938685	0.996022	0.988292	0.963865	0.897688	0.999628	3	1
1118	D	2023-05-07 04:00:00	0.702845	0.624649	0.581916	0.867099	0.995859	0.969973	0.985153	0.947322	0.991654	4	1
1119	H	2023-05-07 04:00:00	0.669666	0.485822	0.697582	0.89305	1	0.974765	0.952549	0.856362	0.994816	3	1
1120	E	2023-05-07 04:00:00	0.822061	0.678754	0.619171	0.933737	1	0.997938	0.997051	0.952969	0.997835	2	1
1121	F	2023-05-07 04:00:00	0.730044	0.609268	0.610232	0.729954	1	0.987443	0.9811	0.936507	0.998564	5	1
1122	G	2023-05-07 04:00:00	0.616836	0.616868	0.634137	0.894216	1	0.981802	0.967838	0.902248	0.997551	3	1
1123	H	2023-05-07 04:00:00	0.688766	0.415468	0.702308	0.900946	1	0.977859	0.963805	0.837007	0.993638	3	1
1124	G	2023-05-07 04:00:00	0.6591	0.420896	0.572936	0.872707	0.982402	0.962693	0.9686	0.487635	0.996846	4	1
1125	I	2023-05-07 04:00:00	0.762554	0.619583	0.537689	0.690565	1	0.984835	0.993961	0.935396	0.997421	5	1
1126	H	2023-05-07 04:00:00	0.604064	0.569839	0.657936	0.944073	0.985138	0.977919	0.939748	0.827911	0.997134	2	1
1127	J	2023-05-07 04:00:00	0.680697	0.510468	0.623425	0.896855	1	0.979072	0.97167	0.85026	0.991498	3	1
1128	H	2023-05-07 04:00:00	0.646734	0.513454	0.587114	0.918122	0.999157	0.975766	0.933689	0.834396	0.994371	2	1
1129	I	2023-05-07 04:00:00	0.739768	0.455277	0.665288	0.81777	0.996599	0.984228	0.979094	0.897979	0.99801	4	1
1130	J	2023-05-07 04:00:00	0.866473	0.689431	0.539382	0.901034	1	0.973066	0.977187	0.926723	0.990407	3	1
1131	K	2023-05-07 04:00:00	0.661538	0.690335	0.659657	0.865318	0.965986	0.96236	0.975161	0.885729	0.988916	4	1
1132	H	2023-05-07 04:00:00	0.636575	0.580117	0.728359	0.903739	0.989722	0.977707	0.939447	0.803413	0.994615	3	1
1133	L	2023-05-07 04:00:00	0.675472	0.548106	0.611059	0.961953	1	0.994844	0.987059	0.930593	0.997341	2	1
1134	N	2023-05-07 04:00:00	0.54746	0.734234	0.940966	0.889861	0.998536	0.974158	0.950061	0.89907	0.998673	6	1
1135	F	2023-05-07 04:00:00	0.662409	0.548034	0.627127	0.906246	1	0.99354	0.986698	0.93039	0.999076	3	1
1136	M	2023-05-07 04:00:00	0.654282	0.499973	0.608735	0.911898	1	0.983318	0.992637	0.810178	0.994411	4	1
1137	O	2023-05-07 04:00:00	0.727431	0.693954	0.607239	0.915021	0.998373	0.985532	0.954455	0.948249	0.996076	3	1
1138	N	2023-05-07 04:00:00	0.798868	0.623926	0.637563	0.938223	1	0.971489	0.964166	0.901354	0.998675	2	1
1139	P	2023-05-07 04:00:00	0.824964	0.609992	0.552261	0.905828	1	0.991447	0.974659	0.910163	0.998998	3	1
1140	Q	2023-05-07 04:00:00	0.745428	0.508984	0.477552	0.931845	1	0.994844	0.980057	0.951878	0.999483	2	1
1141	H	2023-05-07 04:00:00	0.650798	0.504316	0.583885	0.896283	1	0.961328	0.942818	0.757817	0.995883	3	1
1142	R	2023-05-07 04:00:00	0.618433	0.554114	0.527489	0.863602	0.993316	0.955808	0.969082	0.792318	0.996204	4	1
1143	S	2023-05-07 04:00:00	0.688534	0.50522	0.496337	0.820167	0.868027	0.929512	0.900102	0.622973	0.996798	4	1
1144	T	2023-05-07 04:00:00	0.714659	0.537249	0.565178	0.954036	1	0.99545	0.945687	0.843535	0.996569	2	1
1145	I	2023-05-07 04:00:00	0.737881	0.674907	0.782372	0.701781	1	0.98256	0.987801	0.891032	0.993994	5	1
1146	A	2023-05-07 08:00:00	0.624383	0.687621	0.673283	0.879872	0.990343	0.974462	0.98171	0.849482	0.990741	3	1
1147	B	2023-05-07 08:00:00	0.707983	0.657402	0.642486	0.876314	1	0.973309	0.964246	0.894867	0.996186	3	1
1148	C	2023-05-07 08:00:00	0.853701	0.675045	0.59436	0.926039	0.994913	0.988232	0.960896	0.897262	0.999623	3	1
1149	D	2023-05-07 08:00:00	0.648157	0.629173	0.584672	0.871102	0.997338	0.972702	0.9875	0.94814	0.98255	4	1
1150	H	2023-05-07 08:00:00	0.617997	0.435825	0.689666	0.894458	1	0.973825	0.94964	0.858274	0.994562	3	1
1151	E	2023-05-07 08:00:00	0.829608	0.673869	0.602694	0.930064	1	0.997725	0.996449	0.952918	0.997891	2	1
1152	F	2023-05-07 08:00:00	0.72598	0.585021	0.577426	0.726303	1	0.987352	0.981702	0.935154	0.998461	5	1
1153	G	2023-05-07 08:00:00	0.609579	0.621573	0.634609	0.888498	1	0.983015	0.968741	0.90333	0.997645	3	1
1154	H	2023-05-07 08:00:00	0.67672	0.395382	0.689272	0.892435	1	0.977252	0.964106	0.837417	0.993273	3	1
1155	I	2023-05-07 08:00:00	0.734107	0.627726	0.546944	0.77759	0.999408	0.988171	0.988925	0.929926	0.998285	5	1
1156	G	2023-05-07 08:00:00	0.634369	0.415468	0.55356	0.869166	0.984324	0.961177	0.964086	0.488905	0.996313	4	1
1157	I	2023-05-07 08:00:00	0.738171	0.610354	0.530836	0.696943	1	0.985745	0.992376	0.936189	0.997294	5	1
1158	H	2023-05-07 08:00:00	0.6209	0.574507	0.656455	0.940818	0.984576	0.978283	0.947413	0.826668	0.997232	2	1
1159	J	2023-05-07 08:00:00	0.673149	0.509744	0.627402	0.874423	1	0.979072	0.973395	0.849714	0.991746	3	1
1160	H	2023-05-07 08:00:00	0.609869	0.496354	0.575063	0.918738	0.998743	0.976221	0.935374	0.835005	0.994597	2	1
1161	J	2023-05-07 08:00:00	0.870247	0.760726	0.451441	0.925005	1	0.990901	0.986477	0.906449	0.99846	2	1
1162	I	2023-05-07 08:00:00	0.73225	0.437906	0.659735	0.813042	0.997338	0.984228	0.978732	0.899319	0.997945	4	1
1163	J	2023-05-07 08:00:00	0.864151	0.702278	0.543596	0.902133	1	0.974674	0.976967	0.928393	0.990355	3	1
1164	K	2023-05-07 08:00:00	0.642671	0.690154	0.658751	0.862745	1	0.96145	0.973235	0.88635	0.989199	4	1
1165	H	2023-05-07 08:00:00	0.625544	0.580117	0.726079	0.906444	0.987104	0.977555	0.937923	0.806414	0.994552	3	1
1166	L	2023-05-07 08:00:00	0.681277	0.584297	0.607908	0.957335	1	0.995147	0.986698	0.930863	0.99747	2	1
1167	F	2023-05-07 08:00:00	0.643832	0.5191	0.602591	0.907389	1	0.993691	0.982665	0.930458	0.999164	3	1
1168	M	2023-05-07 08:00:00	0.644702	0.488211	0.5944	0.913767	1	0.983318	0.99071	0.807888	0.994573	4	0
1169	O	2023-05-07 08:00:00	0.70566	0.672059	0.58357	0.918232	0.997486	0.984926	0.954395	0.948046	0.996485	2	1
1170	N	2023-05-07 08:00:00	0.82299	0.629173	0.648748	0.928084	1	0.972399	0.962501	0.899637	0.998747	2	1
1171	P	2023-05-07 08:00:00	0.786067	0.576878	0.515399	0.906444	1	0.991204	0.973837	0.910975	0.998035	3	1
1172	Q	2023-05-07 08:00:00	0.753266	0.54684	0.482987	0.933803	1	0.994935	0.975221	0.951866	0.999478	2	1
1173	H	2023-05-07 08:00:00	0.63164	0.51083	0.579553	0.896349	1	0.960024	0.942337	0.769182	0.995801	3	1
1174	R	2023-05-07 08:00:00	0.617765	0.516729	0.423204	0.855487	0.992754	0.956021	0.968941	0.789815	0.996028	4	1
1175	S	2023-05-07 08:00:00	0.691727	0.509744	0.448015	0.823818	0.864596	0.931453	0.903674	0.62116	0.997003	4	1
1176	T	2023-05-07 08:00:00	0.730334	0.547021	0.578883	0.958874	1	0.995754	0.942196	0.844591	0.996479	2	1
1177	I	2023-05-07 08:00:00	0.728302	0.679279	0.776859	0.689686	1	0.98162	0.988182	0.894834	0.993557	5	1
1178	A	2023-05-07 12:00:00	0.615965	0.686716	0.669345	0.880216	0.991408	0.976524	0.981429	0.849752	0.991981	3	1
1179	B	2023-05-07 12:00:00	0.634543	0.578145	0.60204	0.876314	1	0.973309	0.964246	0.896486	0.996313	3	1
1180	C	2023-05-07 12:00:00	0.837736	0.666667	0.585342	0.929096	0.998802	0.98805	0.960896	0.90032	0.999609	3	1
1181	D	2023-05-07 12:00:00	0.591205	0.619945	0.582428	0.879195	0.998225	0.973612	0.987902	0.948961	0.993328	3	1
1182	H	2023-05-07 12:00:00	0.559361	0.391274	0.675173	0.888388	1	0.974886	0.949239	0.858693	0.994987	3	1
1183	E	2023-05-07 12:00:00	0.766618	0.646545	0.56864	0.93466	1	0.998029	0.996328	0.953637	0.99767	2	1
1184	F	2023-05-07 12:00:00	0.669086	0.473554	0.517092	0.723488	1	0.986958	0.982183	0.934408	0.99838	5	1
1185	G	2023-05-07 12:00:00	0.5791	0.536525	0.586996	0.892017	1	0.983925	0.96844	0.904683	0.997727	3	1
1186	H	2023-05-07 12:00:00	0.657707	0.37403	0.671314	0.883066	1	0.976039	0.964828	0.838224	0.992489	3	1
1187	I	2023-05-07 12:00:00	0.703338	0.600221	0.532727	0.768287	0.999556	0.985138	0.98738	0.930491	0.996124	5	1
1188	G	2023-05-07 12:00:00	0.630102	0.414382	0.551945	0.869232	0.985211	0.9633	0.965771	0.487236	0.997438	4	1
1189	I	2023-05-07 12:00:00	0.722496	0.589183	0.518982	0.690345	1	0.984835	0.985213	0.936348	0.997237	5	1
1190	H	2023-05-07 12:00:00	0.609289	0.575105	0.651248	0.938927	0.984472	0.978617	0.944804	0.82488	0.9974	2	1
1191	H	2023-05-07 12:00:00	0.554136	0.459295	0.541824	0.915879	0.998802	0.97704	0.93391	0.83717	0.994875	3	1
1192	J	2023-05-07 12:00:00	0.773295	0.760183	0.419187	0.9426	1	0.995147	0.989426	0.911502	0.999171	2	1
1193	I	2023-05-07 12:00:00	0.700493	0.412573	0.658239	0.810974	0.994232	0.984228	0.979154	0.89945	0.997948	4	1
1194	J	2023-05-07 12:00:00	0.837736	0.709878	0.53761	0.898834	1	0.974158	0.976927	0.930762	0.990459	3	1
1195	K	2023-05-07 12:00:00	0.613062	0.689431	0.657254	0.86468	0.966578	0.962147	0.975041	0.887977	0.989298	4	1
1196	H	2023-05-07 12:00:00	0.609869	0.576444	0.728288	0.903739	0.986764	0.977373	0.94021	0.808938	0.994609	3	1
1197	L	2023-05-07 12:00:00	0.623222	0.549916	0.573251	0.963272	1	0.995147	0.986778	0.931608	0.997843	2	1
1198	F	2023-05-07 12:00:00	0.592163	0.4657	0.581167	0.904684	1	0.993691	0.986236	0.930796	0.999269	3	1
1199	M	2023-05-07 12:00:00	0.637155	0.495992	0.606372	0.908049	1	0.982712	0.992757	0.810027	0.994303	4	1
1200	O	2023-05-07 12:00:00	0.645283	0.644011	0.567895	0.928898	0.996643	0.985138	0.954395	0.947437	0.996482	2	1
1201	N	2023-05-07 12:00:00	0.807431	0.62664	0.651504	0.937497	1	0.971489	0.961859	0.901283	0.998731	2	1
1202	P	2023-05-07 12:00:00	0.765747	0.535982	0.483932	0.907236	1	0.990961	0.973335	0.912125	0.996878	3	1
1203	Q	2023-05-07 12:00:00	0.737881	0.481878	0.473732	0.930592	1	0.994904	0.977187	0.952372	0.999437	2	1
1204	H	2023-05-07 12:00:00	0.587518	0.507392	0.578371	0.890851	1	0.96057	0.943039	0.768574	0.996056	3	1
1205	R	2023-05-07 12:00:00	0.564238	0.473282	0.312579	0.842358	0.992768	0.956233	0.969583	0.80551	0.990936	4	1
1206	S	2023-05-07 12:00:00	0.681858	0.516621	0.375394	0.823444	0.873795	0.929603	0.898337	0.624589	0.996815	4	1
1207	T	2023-05-07 12:00:00	0.714949	0.533992	0.565966	0.959424	1	0.995754	0.944905	0.844679	0.99651	2	1
1208	I	2023-05-07 12:00:00	0.719013	0.68327	0.781979	0.280405	1		0.987119	0.89938	0.993243	7	0
1209	A	2023-05-07 16:00:00	0.606096	0.683278	0.661074	0.884242	0.994957	0.979163	0.984721	0.863485	0.99309	3	1
1210	B	2023-05-07 16:00:00	0.607547	0.550097	0.619132	0.877194	1	0.971186	0.96226	0.896658	0.996281	3	1
1211	C	2023-05-07 16:00:00	0.833672	0.663355	0.580419	0.927007	0.997797	0.987777	0.964969	0.899752	0.999616	3	1
1212	D	2023-05-07 16:00:00	0.615646	0.620126	0.582979	0.872355	0.999261	0.967243	0.98744	0.949704		4	0
1213	H	2023-05-07 16:00:00	0.556749	0.375333	0.664501	0.886739	1	0.97522	0.946249	0.859278	0.99513	3	1
1214	E	2023-05-07 16:00:00	0.719594	0.617773	0.563611	0.934792	1	0.998059	0.998014	0.954166	0.997824	2	1
1215	F	2023-05-07 16:00:00	0.661248	0.433201	0.496574	0.695865	1	0.987655	0.98124	0.934841	0.998463	5	1
1216	G	2023-05-07 16:00:00	0.573004	0.495449	0.578174	0.888058	1	0.983925	0.96846	0.904616	0.997715	3	1
1217	H	2023-05-07 16:00:00	0.651147	0.364801	0.666903	0.880361	1	0.976039	0.964327	0.839197	0.993722	3	1
1218	I	2023-05-07 16:00:00	0.695791	0.577783	0.528946	0.771124	0.999261	0.988171	0.988945	0.930725	0.998362	5	1
1219	G	2023-05-07 16:00:00	0.625893	0.41782	0.551709	0.874533	0.98181	0.96694	0.96549	0.487249	0.997421	3	1
1220	I	2023-05-07 16:00:00	0.721916	0.586287	0.514847	0.691225	1	0.984531	0.993098	0.936416	0.997205	5	1
1221	H	2023-05-07 16:00:00	0.595356	0.573784	0.651619	0.934088	0.984014	0.9798	0.94653	0.822486	0.997546	2	1
1222	J	2023-05-07 16:00:00	0.628157	0.495811	0.622991	0.875962	1	0.979072	0.975723	0.847577	0.992134	3	1
1223	H	2023-05-07 16:00:00	0.562264	0.441579	0.514965	0.91126	0.998758	0.976554	0.934652	0.837102	0.994696	3	1
1224	J	2023-05-07 16:00:00	0.761393	0.75385	0.356372	0.919068	1	0.989384	0.988423	0.907856	0.998929	2	1
1225	I	2023-05-07 16:00:00	0.679884	0.380363	0.653631	0.808533	0.99231	0.984531	0.978411	0.89859	0.998264	4	1
1226	J	2023-05-07 16:00:00	0.802322	0.70065	0.532136	0.901254	1	0.97249	0.976726	0.930059	0.99035	3	1
1227	K	2023-05-07 16:00:00	0.591292	0.68925	0.657175	0.862261	0.967317	0.961844	0.975322	0.889402	0.989006	4	1
1228	H	2023-05-07 16:00:00	0.613643	0.576769	0.729789	0.905806	0.988421	0.977343	0.938625	0.81055	0.994606	3	1
1229	L	2023-05-07 16:00:00	0.588389	0.50703	0.559074	0.966791	1	0.995147	0.987219	0.931811	0.997551	2	1
1230	F	2023-05-07 16:00:00	0.597388	0.435861	0.584909	0.902771	1	0.993691	0.979916	0.931134	0.999175	3	1
1231	M	2023-05-07 16:00:00	0.617997	0.470297	0.579868	0.912954	1	0.983621	0.994161	0.810937	0.994607	4	1
1232	O	2023-05-07 16:00:00	0.647315	0.634964	0.578253	0.928546	0.998048	0.985927	0.955699	0.946896	0.996244	2	1
1233	N	2023-05-07 16:00:00	0.805602	0.624468	0.631774	0.93532	1	0.972399	0.9622	0.902188	0.998729	2	1
1234	P	2023-05-07 16:00:00	0.780842	0.526754	0.480388	0.907785	1	0.99084	0.973937	0.911651	0.997618	3	1
1235	Q	2023-05-07 16:00:00	0.718142	0.452256	0.469518	0.932725	1	0.995572	0.97486	0.952707	0.99947	2	1
1236	H	2023-05-07 16:00:00	0.576197	0.494725	0.575221	0.890917	1	0.961328	0.942979	0.7589	0.995642	3	1
1237	R	2023-05-07 16:00:00	0.513701	0.469428	0.264335	0.835056	0.992709	0.95781	0.967517	0.816401	0.98427	4	1
1238	S	2023-05-07 16:00:00	0.688534	0.53924	0.525441	0.824742	0.853268	0.927237	0.898417	0.622256	0.996818	4	1
1239	T	2023-05-07 16:00:00	0.699274	0.534535	0.571558	0.959424	1	0.995754	0.947072	0.844435	0.996445	2	1
1240	I	2023-05-07 16:00:00	0.720464	0.686851	0.781191	0.288542	1	0.982439	0.987139	0.901592	0.993795	6	1
1241	A	2023-05-07 20:00:00	0.602032	0.68165	0.654379	0.887242	0.995342	0.979678	0.985257	0.865244	0.993621	3	1
1242	B	2023-05-07 20:00:00	0.640348	0.631345	0.659972	0.880735	1	0.975736	0.963404	0.895403	0.99613	3	0
1243	C	2023-05-07 20:00:00	0.838897	0.668748	0.587311	0.932615	0.996983	0.988353	0.965831	0.898845	0.999623	3	1
1244	D	2023-05-07 20:00:00	0.652917	0.629535	0.585027	0.879415	0.998817	0.974826	0.987661	0.95062	0.993606	3	1
1245	H	2023-05-07 20:00:00	0.6	0.433654	0.676276	0.888696	1	0.976585	0.951927	0.860339	0.995209	3	1
1246	E	2023-05-07 20:00:00	0.735269	0.616507	0.579659	0.937013	1	0.99812	0.997071	0.953978	0.997784	2	1
1247	F	2023-05-07 20:00:00	0.676633	0.471925	0.538201	0.693138	1	0.987655	0.980759	0.934812	0.998605	5	1
1248	G	2023-05-07 20:00:00	0.573004	0.509563	0.590343	0.889598	1	0.982408	0.968018	0.904007	0.99775	3	1
1249	H	2023-05-07 20:00:00	0.658984	0.377649	0.678127	0.884055	1	0.976949	0.964748	0.839938	0.992599	3	1
1250	I	2023-05-07 20:00:00	0.727431	0.596602	0.544975	0.773433	0.999113	0.988171	0.989266	0.930648	0.998245	5	1
1251	G	2023-05-07 20:00:00	0.640581	0.41402	0.552694	0.87031	0.981219	0.964513	0.963965	0.486774	0.997793	4	1
1252	I	2023-05-07 20:00:00	0.733817	0.606916	0.523039	0.694304	1	0.984228	0.9936	0.936214	0.996772	5	1
1253	H	2023-05-07 20:00:00	0.586647	0.568084	0.645865	0.93444	0.983747	0.979193	0.94352	0.818487	0.997775	2	1
1254	J	2023-05-07 20:00:00	0.642961	0.499973	0.621534	0.898834	1	0.979678	0.975221	0.846676	0.99237	3	1
1255	H	2023-05-07 20:00:00	0.584035	0.466985	0.551552	0.915153	0.998832	0.977889	0.93381	0.836087	0.994819	3	1
1256	J	2023-05-07 20:00:00	0.836865	0.749145	0.402725	0.932703	1	0.993024	0.988945	0.907261	0.999072	2	1
1257	I	2023-05-07 20:00:00	0.695269	0.404068	0.656821	0.809017	0.994085	0.984228	0.978552	0.898534	0.99803	4	1
1258	J	2023-05-07 20:00:00	0.797388	0.686716	0.531467	0.901034	1	0.974977	0.977067	0.928357	0.990689	3	1
1259	K	2023-05-07 20:00:00	0.605806	0.690516	0.660956	0.865032	0.967317	0.962087	0.975402	0.889111	0.989373	4	1
1260	H	2023-05-07 20:00:00	0.61016	0.584442	0.733266	0.906576	0.989086	0.978374	0.944022	0.813	0.994558	3	1
1261	L	2023-05-07 20:00:00	0.608708	0.513725	0.58034	0.960633	1	0.99454	0.987721	0.931878	0.997528	2	1
1262	F	2023-05-07 20:00:00	0.617707	0.471654	0.608026	0.905366	1	0.993327	0.978652	0.930863	0.999065	3	1
1263	M	2023-05-07 20:00:00	0.625544	0.478801	0.594912	0.916472	1	0.984228	0.99364	0.811014	0.99506	4	1
1264	O	2023-05-07 20:00:00	0.659507	0.66283	0.602276	0.929272	0.996673	0.986382	0.955579	0.94649	0.99636	2	1
1265	N	2023-05-07 20:00:00	0.828186	0.638764	0.69581	0.939433	1	0.972096	0.964306	0.896723	0.998808	2	1
1266	P	2023-05-07 20:00:00	0.790131	0.56023	0.502639	0.911766	1	0.991265	0.973757	0.911042	0.998563	3	1
1267	Q	2023-05-07 20:00:00	0.753266	0.628739	0.506537	0.933451	1	0.995663	0.97496	0.952281	0.999488	2	1
1268	H	2023-05-07 20:00:00	0.608128	0.497259	0.581522	0.890895	1	0.959448	0.942357	0.752	0.995973	3	1
1269	R	2023-05-07 20:00:00	0.512134	0.493459	0.349953	0.838707	0.993567	0.959084	0.973155	0.819581	0.994252	4	1
1270	S	2023-05-07 20:00:00	0.689405	0.555163	0.509255	0.824544	0.848004	0.928025	0.895387	0.622756	0.996683	4	1
1271	T	2023-05-07 20:00:00	0.709144	0.535982	0.56762	0.957159	1	0.995754	0.948556	0.844564	0.996542	2	1
1272	I	2023-05-07 20:00:00	0.728592	0.688966	0.782766	0.680449	1	0.982712	0.987581	0.903175	0.994364	5	1
1273	A	2023-05-08	0.602322	0.680383	0.655167	0.887242	0.995342	0.979678	0.985257	0.860644	0.99316	3	1
1274	B	2023-05-08	0.683309	0.668802	0.676197	0.880735	1	0.975736	0.963404	0.893407	0.996064	3	0
1275	C	2023-05-08	0.849637	0.675045	0.596487	0.932615	0.996983	0.988353	0.965831	0.897905	0.999625	3	1
1276	D	2023-05-08	0.671756	0.636773	0.587508	0.879415	0.998817	0.974826	0.987661	0.951141	0.995175	3	1
1277	H	2023-05-08	0.632511	0.481479	0.719754	0.888696	1	0.976585	0.951927	0.858775	0.994642	3	1
1278	E	2023-05-08	0.758781	0.656135	0.608101	0.937013	1	0.99812	0.997071	0.953614	0.997695	2	1
1279	F	2023-05-08	0.699274	0.532725	0.572621	0.693138	1	0.987655	0.980759	0.934976	0.99867	5	1
1280	G	2023-05-08	0.561974	0.520421	0.607042	0.889598	1	0.982408	0.968018	0.90421	0.997972	3	1
1281	H	2023-05-08	0.66508	0.39683	0.693447	0.884055	1	0.976949	0.964748	0.840553	0.993328	3	1
1282	I	2023-05-08	0.744557	0.612707	0.557656	0.773433	0.999113	0.988171	0.989266	0.930838	0.998242	5	1
1283	G	2023-05-08	0.62418	0.41963	0.556238	0.87031	0.981219	0.964513	0.963965	0.481747	0.996843	4	1
1284	I	2023-05-08	0.741945	0.604202	0.52804	0.694304	1	0.984228	0.9936	0.935234	0.996148	5	1
1285	H	2023-05-08	0.593033	0.567324	0.645853	0.93444	0.983747	0.979193	0.94352	0.814147	0.997896	2	1
1286	J	2023-05-08	0.665602	0.50703	0.624409	0.898834	1	0.979678	0.975221	0.848128	0.992163	3	1
1287	H	2023-05-08	0.606096	0.503447	0.581207	0.915153	0.998832	0.977889	0.93381	0.834328	0.994598	3	1
1288	J	2023-05-08	0.841509	0.770678	0.463571	0.932703	1	0.993024	0.988945	0.911299	0.990707	2	1
1289	I	2023-05-08	0.710624	0.426144	0.666233	0.809017	0.994085	0.984228	0.978552	0.897548	0.997998	4	1
1290	J	2023-05-08	0.813353	0.693412	0.54403	0.901034	1	0.974977	0.977067	0.928339	0.990944	3	1
1291	K	2023-05-08	0.624383	0.69124	0.66517	0.865032	0.967317	0.962087	0.975402	0.88766	0.989862	4	1
1292	H	2023-05-08	0.613353	0.584767	0.734767	0.906576	0.989086	0.978374	0.944022	0.813772	0.994487	3	1
1293	L	2023-05-08	0.63193	0.567287	0.614209	0.960633	1	0.99454	0.987721	0.931878	0.997224	2	1
1294	F	2023-05-08	0.632511	0.523569	0.62307	0.905366	1	0.993327	0.978652	0.930322	0.999139	3	1
1295	M	2023-05-08	0.634253	0.481516	0.602316	0.916472	1	0.984228	0.99364	0.811992	0.995733	4	1
1296	O	2023-05-08	0.684761	0.672783	0.611019	0.929272	0.996673	0.986382	0.955579	0.945949	0.99648	2	1
1297	N	2023-05-08	0.851901	0.650345	0.740745	0.939433	1	0.972096	0.964306	0.892621	0.998881	2	1
1298	P	2023-05-08	0.777649	0.515716	0.46877	0.911766	1	0.991265	0.973757	0.910636	0.997036	3	1
1299	Q	2023-05-08	0.73643	0.512368	0.483578	0.933451	1	0.995663	0.97496	0.952117	0.999479	2	1
1300	H	2023-05-08	0.618578	0.496173	0.590186	0.890895	1	0.959448	0.942357	0.74219	0.995987	3	1
1301	R	2023-05-08	0.544093	0.523641	0.43813	0.838707	0.993567	0.959084	0.973155	0.809975	0.996558	4	1
1302	S	2023-05-08	0.68418	0.55643	0.513193	0.824544	0.848004	0.928025	0.895387	0.621234	0.996685	4	1
1303	T	2023-05-08	0.706821	0.531278	0.572424	0.957159	1	0.995754	0.948556	0.843813	0.996514	2	1
1304	I	2023-05-08	0.727141	0.68826	0.780009	0.680449	1	0.982712	0.987581	0.904257	0.994517	5	1
1305	A	2023-05-08 04:00:00	0.609579	0.682916	0.663831	0.879872	0.995164	0.97886	0.984424	0.857735	0.993437	3	1
1306	B	2023-05-08 04:00:00	0.71553	0.680383	0.670644	0.882692	1	0.973006	0.966152	0.894245	0.996159	3	0
1307	C	2023-05-08 04:00:00	0.837736	0.664857	0.582782	0.938619	0.998787	0.988141	0.965972	0.899988	0.999611	3	1
1308	D	2023-05-08 04:00:00	0.68656	0.635145	0.587784	0.870574	0.999113	0.974219	0.985534	0.951577	0.993562	3	1
1309	H	2023-05-08 04:00:00	0.651379	0.495956	0.713059	0.897141	1	0.975827	0.950683	0.85755	0.995002	3	1
1310	E	2023-05-08 04:00:00	0.778229	0.676945	0.624401	0.936815	1	0.99812	0.998295	0.953529	0.997926	2	1
1311	F	2023-05-08 04:00:00	0.718723	0.59244	0.606569	0.690631	1	0.987413	0.982484	0.936092	0.998643	5	1
1312	G	2023-05-08 04:00:00	0.594775	0.602211	0.630868	0.885639	1	0.983621	0.968379	0.902789	0.997937	3	1
1313	H	2023-05-08 04:00:00	0.668273	0.408592	0.705813	0.89503	1	0.978465	0.96553	0.840986	0.992889	3	1
1314	I	2023-05-08 04:00:00	0.753556	0.623564	0.563878	0.775742	0.999113	0.987868	0.989246	0.93106	0.99817	5	1
1315	G	2023-05-08 04:00:00	0.620116	0.422887	0.562027	0.864548	0.982254	0.956324	0.962802	0.473413	0.995065	4	1
1316	I	2023-05-08 04:00:00	0.749782	0.623745	0.535129	0.685947	1	0.983621	0.985955	0.934133	0.996507	5	1
1317	H	2023-05-08 04:00:00	0.598549	0.573331	0.658526	0.93455	0.983378	0.979557	0.94027	0.814573	0.997855	2	1
1318	J	2023-05-08 04:00:00	0.669376	0.509021	0.624961	0.898834	1	0.979678	0.975221	0.852368	0.992147	3	1
1319	H	2023-05-08 04:00:00	0.617126	0.525867	0.596369	0.918562	0.998861	0.977495	0.934793	0.834058	0.994786	2	1
1320	J	2023-05-08 04:00:00	0.853991	0.755478	0.485586	0.922586	1	0.983015	0.990008	0.914986	0.996943	2	1
1321	I	2023-05-08 04:00:00	0.724093	0.452201	0.67348	0.814119	0.990683	0.984531	0.978331	0.89725	0.998167	4	1
1322	J	2023-05-08 04:00:00	0.8418	0.697573	0.545723	0.901913	1	0.974492	0.976967	0.929182	0.990687	3	1
1323	K	2023-05-08 04:00:00	0.639187	0.691783	0.667139	0.86347	0.967761	0.962906	0.976084	0.886027	0.989636	4	1
1324	H	2023-05-08 04:00:00	0.618868	0.590449	0.737173	0.905388	0.988465	0.97798	0.944724	0.813737	0.994265	3	1
1325	L	2023-05-08 04:00:00	0.658055	0.620126	0.633507	0.961513	1	0.99454	0.986758	0.931472	0.99685	2	1
1326	F	2023-05-08 04:00:00	0.642961	0.530138	0.628151	0.903079	1	0.993388	0.986617	0.930322	0.999086	3	1
1327	M	2023-05-08 04:00:00	0.639478	0.47663	0.600307	0.916978	1	0.986655	0.992837	0.81078	0.99592	3	1
1328	O	2023-05-08 04:00:00	0.71553	0.685088	0.609405	0.932923	0.99583	0.985472	0.954856	0.945746	0.99664	2	1
1329	N	2023-05-08 04:00:00	0.841451	0.650888	0.761224	0.948977	0.999556	0.971793	0.965731	0.891778	0.998985	2	1
1330	P	2023-05-08 04:00:00	0.796517	0.567287	0.513429	0.911458	1	0.991871	0.97494	0.911042	0.997731	3	1
1331	Q	2023-05-08 04:00:00	0.733817	0.48385	0.479915	0.932373	1	0.994965	0.975622	0.95215	0.999488	2	1
1332	H	2023-05-08 04:00:00	0.624383	0.505763	0.602001	0.86976	1	0.958144	0.94035	0.742461	0.996052	4	1
1333	R	2023-05-08 04:00:00	0.586647	0.548342	0.524653	0.863624	0.993286	0.956779	0.973837	0.801113	0.996465	4	1
1334	S	2023-05-08 04:00:00	0.678955	0.569097	0.508192	0.826831	0.859243	0.932211	0.89617	0.620118	0.996644	4	1
1335	T	2023-05-08 04:00:00	0.693179	0.512821	0.578292	0.954871	1	0.99545	0.948336	0.843231	0.996359	2	1
1336	D	2023-05-08 04:00:00	0.714369	0.764526	0.630238	0.881196	1	0.98811	0.987059	0.964959	0.997034	3	1
1337	I	2023-05-08 04:00:00	0.724819	0.690061	0.781585	0.662415	1	0.983773	0.985915	0.906618	0.994856	5	1
1338	A	2023-05-08 08:00:00	0.606096	0.687621	0.671708	0.880556	0.994188	0.978374	0.984258	0.854623	0.993143	3	1
1339	B	2023-05-08 08:00:00	0.700726	0.679297	0.648826	0.875544	0.997486	0.970579	0.965591	0.893486	0.996158	3	1
1340	C	2023-05-08 08:00:00	0.83135	0.66245	0.576166	0.930394	0.998063	0.988353	0.963464	0.901585	0.999639	3	1
1341	D	2023-05-08 08:00:00	0.648418	0.622116	0.581797	0.872729	0.999113	0.974826	0.987581	0.951532	0.993696	4	1
1342	H	2023-05-08 08:00:00	0.599419	0.426777	0.685019	0.901803	1	0.975887	0.95273	0.858586	0.994652	3	1
1343	E	2023-05-08 08:00:00	0.787518	0.672964	0.613922	0.931427	1	0.997998	0.997332	0.953334	0.998027	2	1
1344	F	2023-05-08 08:00:00	0.723657	0.590087	0.593455	0.687398	1	0.98808	0.982745	0.934556	0.99856	5	1
1345	G	2023-05-08 08:00:00	0.598258	0.59624	0.609877	0.890477	1	0.984835	0.968299	0.902992	0.998229	3	1
1346	H	2023-05-08 08:00:00	0.662642	0.389773	0.692738	0.888102	1	0.977252	0.966072	0.841552	0.992949	3	1
1347	I	2023-05-08 08:00:00	0.718723	0.598592	0.539067	0.771388	0.999261	0.988171	0.988905	0.931804	0.998339	5	1
1348	G	2023-05-08 08:00:00	0.631118	0.431573	0.58546	0.856961	0.976043	0.951471	0.959471	0.457538	0.994848	4	1
1349	I	2023-05-08 08:00:00	0.745718	0.624287	0.536547	0.67759	1	0.982408	0.985373	0.933808	0.996069	5	1
1350	H	2023-05-08 08:00:00	0.606096	0.573005	0.656632	0.932857	0.985359	0.980194	0.945146	0.819428	0.99772	2	1
1351	H	2023-05-08 08:00:00	0.592453	0.503266	0.58294	0.918298	0.998699	0.977859	0.933769	0.83514	0.994807	2	1
1352	J	2023-05-08 08:00:00	0.82119	0.754212	0.500039	0.898395	1	0.964816	0.982444	0.915554	0.992504	3	1
1353	I	2023-05-08 08:00:00	0.715298	0.423792	0.664658	0.811722	0.993345	0.984228	0.979174	0.898669	0.998189	4	1
1354	J	2023-05-08 08:00:00	0.8418	0.691964	0.544817	0.899054	1	0.974856	0.976846	0.92822	0.99067	3	1
1355	K	2023-05-08 08:00:00	0.63164	0.69124	0.665721	0.86358	0.968205	0.962875	0.973937	0.885021	0.989603	4	1
1356	H	2023-05-08 08:00:00	0.614514	0.595118	0.738882	0.955553	0.986158	0.977555	0.944162	0.812533	0.993612	2	1
1357	L	2023-05-08 08:00:00	0.675472	0.63243	0.614997	0.958214	1	0.993327	0.98744	0.931608	0.995974	2	1
1358	F	2023-05-08 08:00:00	0.632511	0.496716	0.619014	0.904311	1	0.992933	0.977549	0.930322	0.998921	3	1
1359	M	2023-05-08 08:00:00	0.633382	0.471925	0.589635	0.919375	1	0.987261	0.993218	0.808892	0.99606	3	1
1360	J	2023-05-08 08:00:00	0.712046	0.673145	0.552379	0.889598	1	0.968759	0.980217	0.914019	0.979432	3	1
1361	O	2023-05-08 08:00:00	0.692598	0.677126	0.593652	0.909853	0.998004	0.984835	0.955799	0.945408	0.996232	3	1
1362	N	2023-05-08 08:00:00	0.840493	0.651611	0.773945	0.939433	0.998817	0.971489	0.966393	0.890905	0.99904	2	1
1363	P	2023-05-08 08:00:00	0.734978	0.47102	0.442226	0.905344	1	0.991538	0.973977	0.911313	0.994762	3	1
1364	Q	2023-05-08 08:00:00	0.737881	0.487071	0.478497	0.932571	1	0.994965	0.964567	0.95202	0.99945	2	1
1365	H	2023-05-08 08:00:00	0.614514	0.513182	0.593336	0.869606	1	0.95687	0.93708	0.76235	0.995464	4	1
1366	S	2023-05-08 08:00:00	0.650508	0.496716	0.105899	0.805322	0.920127	0.928116	0.900383	0.634825	0.99635	4	1
1367	T	2023-05-08 08:00:00	0.709724	0.528202	0.57975	0.952364	1	0.99454	0.946149	0.843623	0.995454	2	1
1368	D	2023-05-08 08:00:00	0.679536	0.76145	0.629962	0.881504	1	0.98168	0.987982	0.965432	0.997304	3	1
1369	I	2023-05-08 08:00:00	0.732946	0.689304	0.781979	0.642402	1	0.984592	0.986959	0.908898	0.994957	6	1
1370	A	2023-05-08 12:00:00	0.598549	0.685992	0.668557	0.880556	0.994188	0.978374	0.984258	0.853947	0.992565	3	1
1371	B	2023-05-08 12:00:00	0.634543	0.566564	0.596723	0.875544	0.997486	0.970579	0.965591	0.89699	0.996476	3	1
1372	C	2023-05-08 12:00:00	0.813353	0.657058	0.570534	0.930394	0.998063	0.988353	0.963464	0.904839	0.999618	3	1
1373	D	2023-05-08 12:00:00	0.590566	0.618497	0.583294	0.872729	0.999113	0.974826	0.987581	0.951526	0.994053	4	1
1374	H	2023-05-08 12:00:00	0.625254	0.404321	0.637524	0.901803	1	0.975887	0.95273	0.859279	0.994625	3	1
1375	E	2023-05-08 12:00:00	0.74688	0.631888	0.580955	0.934374	1	0.998059	0.99675	0.953832	0.997801	2	1
1376	F	2023-05-08 12:00:00	0.710595	0.545935	0.56061	0.68168	1	0.989991	0.982605	0.934589	0.998561	5	1
1377	G	2023-05-08 12:00:00	0.565747	0.502325	0.581443	0.890477	1	0.984228	0.970627	0.903127	0.997902	3	1
1378	H	2023-05-08 12:00:00	0.636168	0.37023	0.686555	0.888102	1	0.977252	0.966072	0.841766	0.992595	3	1
1379	I	2023-05-08 12:00:00	0.715239	0.574525	0.541745	0.771388	0.999261	0.988171	0.988905	0.932331	0.997373	5	1
1380	G	2023-05-08 12:00:00	0.628012	0.442249	0.599795	0.856961	0.976043	0.951471	0.959471	0.44435	0.995592	4	1
1381	I	2023-05-08 12:00:00	0.757039	0.611802	0.539422	0.671652	1	0.979375	0.985353	0.932541	0.994915	6	1
1382	H	2023-05-08 12:00:00	0.613353	0.569766	0.653525	0.932857	0.985359	0.980194	0.945146	0.813268	0.997699	2	1
1383	J	2023-05-08 12:00:00	0.654282	0.518792	0.626851	0.891357	1	0.978162	0.974439	0.868836	0.991066	3	1
1384	H	2023-05-08 12:00:00	0.586938	0.482873	0.582309	0.918298	0.998699	0.977859	0.933769	0.834261	0.994653	2	1
1385	J	2023-05-08 12:00:00	0.781132	0.745526	0.492281	0.898395	1	0.964816	0.982444	0.914689	0.992076	3	1
1386	I	2023-05-08 12:00:00	0.667054	0.38163	0.661783	0.811722	0.993345	0.984228	0.979174	0.898556	0.998132	4	1
1387	J	2023-05-08 12:00:00	0.817417	0.687259	0.539186	0.899054	1	0.97434	0.976866	0.928945	0.990191	3	1
1388	K	2023-05-08 12:00:00	0.594775	0.686535	0.662374	0.86358	0.968205	0.962875	0.973937	0.884951	0.989805	4	1
1389	H	2023-05-08 12:00:00	0.608708	0.585437	0.73609	0.955553	0.986158	0.977555	0.944162	0.8099	0.993592	2	1
1390	L	2023-05-08 12:00:00	0.646444	0.617592	0.598456	0.958214	1	0.993934	0.989767	0.93154	0.996033	2	1
1391	F	2023-05-08 12:00:00	0.636284	0.505076	0.611334	0.904311	1	0.992933	0.977549	0.929916	0.999001	3	1
1392	M	2023-05-08 12:00:00	0.609579	0.465049	0.581994	0.919375	1	0.987261	0.993218	0.81198	0.99596	3	1
1393	J	2023-05-08 12:00:00	0.69434	0.668802	0.552773	0.889598	1	0.965423	0.9812	0.914222	0.9797	3	1
1394	O	2023-05-08 12:00:00	0.644993	0.636049	0.571952	0.909853	0.998004	0.984835	0.955799	0.946152	0.996461	3	1
1395	N	2023-05-08 12:00:00	0.824644	0.646726	0.79399	0.939433	0.998817	0.971489	0.966393	0.894187	0.999098	3	1
1396	P	2023-05-08 12:00:00	0.794194	0.591173	0.539776	0.905344	1	0.991538	0.973977	0.911786	0.997986	3	1
1397	Q	2023-05-08 12:00:00	0.737881	0.535548	0.492478	0.932571	1	0.994965	0.964567	0.95232	0.999489	2	1
1398	H	2023-05-08 12:00:00	0.587518	0.493459	0.592549	0.869035	1	0.951896	0.934732	0.734276	0.994707	4	1
1399	R	2023-05-08 12:00:00	0.554282	0.487939	0.477946	0.858654	0.99268	0.957871	0.972071	0.802398	0.994471	4	1
1400	S	2023-05-08 12:00:00	0.625835	0.401534	0	0.805322	0.920127	0.928116	0.900383	0.637504	0.995964	4	1
1401	T	2023-05-08 12:00:00	0.703338	0.531459	0.58164	0.952364	1	0.994237	0.948235	0.84365	0.995456	2	1
1402	D	2023-05-08 12:00:00	0.658636	0.761631	0.628505	0.881504	1	0.98168	0.987982	0.96577	0.997513	3	1
1403	I	2023-05-08 12:00:00	0.736139	0.692889	0.780797	0.642402	1	0.984592	0.986959	0.911611	0.994709	6	1
1404	A	2023-05-08 16:00:00	0.591292	0.68364	0.661862	0.884757	0.995416	0.977586	0.985335	0.864635	0.992107	3	1
1405	B	2023-05-08 16:00:00	0.61074	0.53363	0.6161	0.885221	1	0.974219	0.964587	0.896058	0.996392	3	1
1406	C	2023-05-08 16:00:00	0.801742	0.660062	0.575733	0.935606	0.99997	0.988656	0.963965	0.90676	0.999626	3	0
1407	D	2023-05-08 16:00:00	0.620493	0.620849	0.584082	0.873653	0.999261	0.976342	0.987661	0.951834	0.994138	3	1
1408	H	2023-05-08 16:00:00	0.613933	0.399616	0.685216	0.871982	0.998758	0.965059	0.946269	0.863436	0.987538	4	1
1409	E	2023-05-08 16:00:00	0.719013	0.602935	0.573385	0.942446	1	0.998241	0.997612	0.954164	0.997929	2	1
1410	F	2023-05-08 16:00:00	0.706821	0.467401	0.519967	0.676204	1	0.987473	0.981521	0.935288	0.998612	5	1
1411	G	2023-05-08 16:00:00	0.553846	0.450573	0.586051	0.900374	1	0.982712	0.97169	0.903195	0.997201	3	1
1412	H	2023-05-08 16:00:00	0.657039	0.379458	0.70475	0.878007	1	0.972399	0.963243	0.841641	0.990272	3	1
1413	I	2023-05-08 16:00:00	0.72627	0.578687	0.557459	0.764834	0.999704	0.985441	0.988544	0.93244	0.996329	5	1
1414	G	2023-05-08 16:00:00	0.629811	0.446411	0.610035	0.859534	0.965543	0.954201	0.958548	0.455978	0.9952	4	1
1415	I	2023-05-08 16:00:00	0.765457	0.623202	0.546708	0.672091	1	0.979375	0.985153	0.9322	0.995058	6	1
1416	H	2023-05-08 16:00:00	0.606096	0.567106	0.653284	0.931097	0.983999	0.97801	0.943801	0.811549	0.997397	2	1
1417	J	2023-05-08 16:00:00	0.650508	0.531459	0.626536	0.899494	1	0.975736	0.975923	0.882091	0.989646	3	1
1418	H	2023-05-08 16:00:00	0.583454	0.476612	0.584042	0.91038	0.998506	0.976979	0.932124	0.835546	0.994465	3	1
1419	J	2023-05-08 16:00:00	0.788099	0.735574	0.506853	0.910051	1	0.961177	0.983648	0.911922	0.98748	3	1
1420	I	2023-05-08 16:00:00	0.669666	0.399001	0.685531	0.802991	0.991866	0.983925	0.980217	0.900664	0.997892	4	1
1421	J	2023-05-08 16:00:00	0.785196	0.676764	0.533987	0.899714	1	0.974704	0.976064	0.928272	0.990169	3	1
1422	K	2023-05-08 16:00:00	0.591001	0.682735	0.663319	0.860084	0.966578	0.960934	0.972392	0.882262	0.988414	4	1
1423	H	2023-05-08 16:00:00	0.607837	0.579104	0.733778	0.904552	0.987947	0.977677	0.945607	0.806899	0.993976	3	1
1424	L	2023-05-08 16:00:00	0.629028	0.60203	0.595306	0.960853	1	0.993327	0.987902	0.931066	0.996056	2	1
1425	F	2023-05-08 16:00:00	0.617707	0.471654	0.600859	0.897317	1	0.992994	0.97799	0.930119	0.99894	3	1
1426	M	2023-05-08 16:00:00	0.588099	0.471563	0.601725	0.887354	0.998077	0.975736	0.992155	0.824722	0.989675	4	1
1427	J	2023-05-08 16:00:00	0.684761	0.661926	0.554348	0.898175	1	0.968456	0.979314	0.913681	0.981827	3	1
1428	O	2023-05-08 16:00:00	0.640929	0.619764	0.582821	0.925643	0.995563	0.980042	0.955418	0.945205	0.995926	2	1
1429	N	2023-05-08 16:00:00	0.801713	0.636954	0.707506	0.938949	0.999556	0.971489	0.964407	0.899347	0.998748	2	1
1430	P	2023-05-08 16:00:00	0.779971	0.560954	0.51406	0.909325	1	0.992144	0.974298	0.911178	0.997816	3	1
1431	Q	2023-05-08 16:00:00	0.761103	0.672801	0.516974	0.92903	1	0.995572	0.988062	0.952398	0.999529	2	1
1432	H	2023-05-08 16:00:00	0.587228	0.511192	0.59058	0.874467	1	0.952563	0.933388	0.769791	0.994646	3	1
1433	R	2023-05-08 16:00:00	0.545428	0.472631	0.426552	0.838245	0.992547	0.957173	0.971108	0.806119	0.995649	4	1
1434	S	2023-05-08 16:00:00	0.635994	0.430487	0.26784	0.792237	0.906699	0.926934	0.903533	0.630793	0.99571	4	1
1435	T	2023-05-08 16:00:00	0.697242	0.533992	0.583255	0.947196	1	0.993024	0.951064	0.843075	0.994837	2	1
1436	D	2023-05-08 16:00:00	0.665602	0.758193	0.625709	0.882274	1	0.988869	0.98736	0.965838	0.997433	3	1
1437	I	2023-05-08 16:00:00	0.720464	0.698693	0.780797		1	0.984744	0.982304	0.91412	0.995034	7	0
1438	B	2023-05-08 20:00:00	0.645864	0.617411	0.661626	0.885221	1	0.974219	0.964587	0.893163	0.996632	3	1
1439	C	2023-05-08 20:00:00	0.797968	0.661256	0.577583	0.935606	0.99997	0.988656	0.963965	0.906158	0.999561	3	1
1440	D	2023-05-08 20:00:00	0.657852	0.63044	0.587626	0.873653	0.999261	0.976342	0.987661	0.952207	0.994501	3	1
1441	H	2023-05-08 20:00:00	0.662409	0.506107	0.712665	0.871982	0.998758	0.965059	0.946269	0.86303	0.992961	4	1
1442	E	2023-05-08 20:00:00	0.756168	0.608726	0.585535	0.942446	1	0.998241	0.997612	0.953763	0.99778	2	1
1443	F	2023-05-08 20:00:00	0.729463	0.533087	0.554466	0.676204	1	0.987473	0.981521	0.936271	0.998671	5	1
1444	G	2023-05-08 20:00:00	0.576197	0.462878	0.602513	0.900374	1	0.982712	0.97169	0.902451	0.99761	3	1
1445	H	2023-05-08 20:00:00	0.674601	0.391944	0.713217	0.878007	1	0.972399	0.963243	0.841444	0.991511	3	1
1446	G	2023-05-08 20:00:00	0.632772	0.443877	0.606687	0.859534	0.965543	0.954201	0.958548	0.437158	0.996737	4	1
1447	I	2023-05-08 20:00:00	0.784906	0.617954	0.546629	0.672091	1	0.979375	0.985153	0.93148	0.994794	6	1
1448	J	2023-05-08 20:00:00	0.657184	0.532906	0.625079	0.899494	1	0.975736	0.975923	0.888648	0.989777	3	1
1449	H	2023-05-08 20:00:00	0.616836	0.494761	0.593021	0.91038	0.998506	0.976979	0.932124	0.835072	0.994309	3	1
1450	J	2023-05-08 20:00:00	0.85283	0.734488	0.528001	0.910051	1	0.961177	0.983648	0.911022	0.993194	3	1
1451	I	2023-05-08 20:00:00	0.694078	0.441525	0.673047	0.802991	0.991866	0.983925	0.980217	0.901239	0.998035	4	1
1452	L	2023-05-08 20:00:00	0.658055	0.612707	0.604757	0.960853	1	0.993327	0.987902	0.93066	0.995425	2	1
1453	F	2023-05-08 20:00:00	0.643832	0.548323	0.617596	0.897317	1	0.992994	0.97799	0.928225	0.999158	3	1
1454	O	2023-05-08 20:00:00	0.664731	0.648535	0.608932	0.925643	0.995563	0.980042	0.955418	0.943311	0.995772	2	1
1455	P	2023-05-08 20:00:00	0.794194	0.588097	0.532333	0.909325	1	0.992144	0.974298	0.910839	0.999171	3	1
1456	T	2023-05-08 20:00:00	0.710885	0.544849	0.582743	0.947196	1	0.993024	0.951064	0.84319	0.994994	2	1
1457	I	2023-05-08 20:00:00	0.716981	0.698705	0.779222		1	0.984744	0.982304	0.917192	0.995195	7	0
1458	A	2023-05-10 16:00:00	0.597678	0.703183	0.681947	0.848953	0.992532	0.973703	0.984372	0.861794	0.989169	4	1
1459	B	2023-05-10 16:00:00	0.598258	0.400087	0.567305	0.889576	1	0.977555	0.965149	0.894197	0.996221	3	1
1460	C	2023-05-10 16:00:00	0.790131	0.599497	0.527095	0.925973	0.999852	0.986806	0.961778	0.899583	0.999549	3	1
1461	H	2023-05-10 16:00:00	0.574165	0.367732	0.622913	0.8936	1	0.978162	0.954435	0.863909	0.995708	3	1
1462	I	2023-05-10 16:00:00	0.745718	0.632249	0.563012	0.734022	0.999408	0.985138	0.988463	0.928927	0.996495	5	1
1463	G	2023-05-10 16:00:00	0.615849	0.469935	0.625591	0.859644	0.930494	0.96057	0.954114	0.40617	0.996706	4	1
1464	H	2023-05-10 16:00:00	0.596807	0.55681	0.656943	0.923642	0.982904	0.97704	0.94663	0.792057	0.997629	2	1
1465	H	2023-05-10 16:00:00	0.587808	0.429944	0.518313	0.907192	0.998151	0.975827	0.935595	0.837237	0.994493	3	1
1466	J	2023-05-10 16:00:00	0.801451	0.699564	0.527883	0.903453	1	0.975341	0.978813	0.930131	0.990403	3	1
1467	K	2023-05-10 16:00:00	0.653991	0.663192	0.620156	0.85254	0.979148	0.962815	0.975602	0.893349	0.990464	4	1
1468	H	2023-05-10 16:00:00	0.611611	0.571051	0.737831	0.897185	0.987578	0.976463	0.944524	0.797058	0.994478	3	1
1469	F	2023-05-10 16:00:00	0.581132	0.646183	0.593533	0.909457	1	0.993327	0.978652	0.922475	0.999173	3	1
1470	M	2023-05-10 16:00:00	0.635704	0.523678	0.621692	0.89547	0.998669	0.978465	0.992235	0.810224	0.991056	4	1
1471	J	2023-05-10 16:00:00	0.68447	0.659754	0.544502	0.904992	1	0.972096	0.980237	0.916589	0.983229	3	1
1472	N	2023-05-10 16:00:00	0.635123	0.556086	0.541903	0.922146	0.995135	0.981953	0.956562	0.933502	0.994788	2	1
1473	O	2023-05-10 16:00:00	0.640929	0.598954	0.556986	0.935452	0.995075	0.985775	0.957304	0.941958	0.99534	2	1
1474	N	2023-05-10 16:00:00	0.890508	0.671335	0.807656	0.953464	0.998817	0.969366	0.971148	0.884183	0.999155	3	1
1475	P	2023-05-10 16:00:00	0.780842	0.554259	0.510909	0.906862	1	0.991598	0.973857	0.910298	0.998686	3	1
1476	H	2023-05-10 16:00:00	0.572424	0.492192	0.58546	0.890873	1	0.959842	0.940611	0.767356	0.995723	3	1
1477	R	2023-05-10 16:00:00	0.52656	0.458589	0.352237	0.837871	1	0.959903	0.972593	0.816266	0.993151	4	1
1478	S	2023-05-10 16:00:00	0.687373	0.458716	0.449	0.802133	0.941556	0.922536	0.909753	0.617047	0.99521	4	1
1479	D	2023-05-10 16:00:00	0.658055	0.751135	0.619368	0.891027	1	0.990234	0.989547	0.965161	0.997991	3	1
1480	E	2023-05-10 20:00:00	0.739332	0.623021	0.574953	0.939653	1	0.997695	0.99697	0.953545	0.998448	2	1
1481	F	2023-05-10 20:00:00	0.714659	0.419087	0.495432		1	0.989961	0.982264	0.933363	0.998201	7	0
1482	G	2023-05-10 20:00:00	0.669086	0.40063	0.540131	0.898175	1	0.983925	0.970366	0.88635	0.997785	3	1
1483	H	2023-05-10 20:00:00	0.6982	0.367334	0.669345	0.88377	1	0.975432	0.962782	0.842308	0.992914	3	1
1484	I	2023-05-10 20:00:00	0.874891	0.619402	0.540446	0.659996	1	0.95875	0.981943	0.913977	0.9825	6	1
1485	J	2023-05-10 20:00:00	0.642671	0.550821	0.628899	0.897955	1	0.973612	0.977468	0.908279	0.989515	3	1
1486	J	2023-05-10 20:00:00	0.749202	0.726707	0.534342	0.934462	1	0.994844	0.99065	0.920993	0.998404	2	1
1487	I	2023-05-10 20:00:00	0.69939	0.406058	0.665446	0.81634	0.995859	0.984835	0.980779	0.903152	0.998229	4	1
1488	L	2023-05-10 20:00:00	0.634833	0.62863	0.579553	0.960853	1	0.994844	0.985715	0.931134	0.997435	2	1
1489	Q	2023-05-10 20:00:00	0.72627	0.592874	0.500433	0.930504	1	0.995723	0.976907	0.953514	0.999535	2	1
1490	T	2023-05-10 20:00:00	0.719594	0.556249	0.586996	0.955047	1	0.994237	0.951506	0.843197	0.995644	2	1
1491	I	2023-05-10 20:00:00	0.678955	0.734874	0.80994	0.582802	1	0.98811	0.985775	0.930924	0.995304	6	1
1492	B	2023-05-11	0.680697	0.639668	0.671629	0.89558	1	0.979982	0.967637	0.890689	0.997081	3	0
1493	C	2023-05-11	0.797968	0.631272	0.54911	0.926237	0.999482	0.987352	0.962581	0.89938	0.999572	3	1
1494	H	2023-05-11	0.662409	0.558982	0.705222	0.897647	1	0.97889	0.955318	0.862282	0.942277	3	1
1495	E	2023-05-11	0.774456	0.66464	0.606352	0.944161	1	0.998271	0.997372	0.95301	0.998706	2	1
1496	F	2023-05-11	0.737881	0.482059	0.546629	0.837849	1	0.990628	0.983929	0.932781	0.998188	4	1
1497	G	2023-05-11	0.666183	0.411849	0.547298	0.898614	1	0.984228	0.969383	0.885674	0.997808	3	1
1498	H	2023-05-11	0.691669	0.382534	0.678678	0.877436	0.996451	0.971793	0.966132	0.842362	0.995685	3	1
1499	I	2023-05-11	0.879826	0.616868	0.541273	0.657137	1	0.955414	0.978772	0.914774	0.982096	6	1
1500	H	2023-05-11	0.635704	0.483977	0.570258	0.908357	0.998299	0.974249	0.935816	0.838726	0.994578	3	1
1501	I	2023-05-11	0.711001	0.430849	0.670723	0.816274	0.989944	0.985138	0.980438	0.904024	0.998183	4	1
1502	F	2023-05-11	0.643832	0.697791	0.654813	0.912052	1	0.993752	0.980157	0.917875	0.999221	3	1
1503	N	2023-05-11	0.674601	0.621808	0.607829	0.922146	0.995179	0.982226	0.956702	0.931878	0.994412	2	1
1504	O	2023-05-11	0.683309	0.667173	0.612673	0.936859	0.994513	0.985259	0.956883	0.939928	0.994711	2	1
1505	P	2023-05-11	0.817997	0.592621	0.547968	0.910051	1	0.991568	0.973917	0.910095	0.999273	3	1
1506	I	2023-05-11	0.676052	0.739506	0.816241	0.586321	1	0.987322	0.983889	0.930884	0.99532	6	1
1507	A	2023-05-11 04:00:00	0.613062	0.68925	0.67919	0.853596	0.993996	0.97616	0.985299	0.858953	0.990917	4	1
1508	B	2023-05-11 04:00:00	0.719013	0.671516	0.676197	0.898109	1	0.979072	0.969222	0.889865	0.997086	3	0
1509	C	2023-05-11 04:00:00	0.801451	0.628884	0.544423	0.923224	1	0.985836	0.960534	0.899393	0.999586	4	1
1510	H	2023-05-11 04:00:00	0.688534	0.543058	0.695495	0.820387	0.992369	0.937944	0.934652	0.86212	0.995479	4	1
1511	E	2023-05-11 04:00:00	0.806386	0.683097	0.622216	0.951506	1	0.998271	0.998014	0.952524	0.998713	2	1
1512	F	2023-05-11 04:00:00	0.757039	0.537611	0.582349	0.844601	1	0.9899	0.983528	0.933243	0.998256	4	1
1513	G	2023-05-11 04:00:00	0.661538	0.414382	0.549976	0.907851	1	0.985138	0.968761	0.8852	0.998171	3	1
1514	H	2023-05-11 04:00:00	0.695065	0.392125	0.686673	0.894854	1	0.975129	0.964126	0.842253	0.994697	3	1
1515	I	2023-05-11 04:00:00	0.82148	0.65903	0.592667	0.420651	0.999408	0.981802	0.98728	0.923318	0.994332	6	1
1516	G	2023-05-11 04:00:00	0.610479	0.448944	0.559901	0.844931	0.948388	0.952381	0.949981	0.325812	0.996027	4	1
1517	I	2023-05-11 04:00:00	0.883599	0.626821	0.543715	0.64768	1	0.955111	0.982183	0.916527	0.982636	6	1
1518	H	2023-05-11 04:00:00	0.61016	0.564863	0.666222	0.925863	0.982387	0.976099	0.94025	0.789637	0.997266	2	1
1519	H	2023-05-11 04:00:00	0.650508	0.511391	0.587902	0.907302	0.998196	0.975766	0.937441	0.838861	0.99451	3	1
1520	I	2023-05-11 04:00:00	0.722119	0.438087	0.674071	0.819024	0.991718	0.984531	0.979294	0.903531	0.998054	4	1
1521	J	2023-05-11 04:00:00	0.85312	0.690697	0.542848	0.898395	1	0.975463	0.979595	0.927982	0.990611	3	1
1522	K	2023-05-11 04:00:00	0.695791	0.669345	0.625197	0.855795	0.984176	0.964968	0.978492	0.891664	0.991316	4	1
1523	H	2023-05-11 04:00:00	0.619158	0.582361	0.742856	0.898592	0.988361	0.975887	0.945186	0.798257	0.994357	3	1
1524	F	2023-05-11 04:00:00	0.669956	0.694805	0.661271	0.910183	1	0.99357	0.980759	0.919431	0.99913	3	1
1525	J	2023-05-11 04:00:00	0.72656	0.666811	0.548047	0.908511	1	0.972399	0.980699	0.914898	0.983404	3	1
1526	N	2023-05-11 04:00:00	0.692888	0.632901	0.617872	0.922146	0.993582	0.981165	0.956562	0.931066	0.994283	2	1
1527	O	2023-05-11 04:00:00	0.707692	0.67405	0.61543	0.935826	0.992842	0.985047	0.956923	0.939455	0.994715	2	1
1528	P	2023-05-11 04:00:00	0.808708	0.588459	0.53828	0.914713	1	0.99175	0.974579	0.910028	0.999218	3	1
1529	Q	2023-05-11 04:00:00	0.722206	0.591245	0.504529	0.932043	1	0.995663	0.964306	0.952832	0.999551	2	1
1530	H	2023-05-11 04:00:00	0.624673	0.50124	0.601607	0.873807	1	0.958113	0.940049	0.758223	0.995899	3	1
1531	S	2023-05-11 04:00:00	0.692308	0.518792	0.542966	0.810556	0.930671	0.922778	0.908469	0.617317	0.995728	4	1
1532	I	2023-05-11 04:00:00	0.678955	0.740222	0.816635	0.577744	1	0.98811	0.98415	0.931256	0.995371	6	1
1533	A	2023-05-11 08:00:00	0.609579	0.68925	0.681947	0.853596	0.993996	0.97616	0.985299	0.862606	0.991769	4	1
1534	B	2023-05-11 08:00:00	0.702758	0.624107	0.63201	0.898109	1	0.979072	0.969222	0.890875	0.997261	3	1
1535	C	2023-05-11 08:00:00	0.794194	0.606391	0.51465	0.928634	1	0.986382	0.960414	0.899623	0.999564	3	1
1536	H	2023-05-11 08:00:00	0.614224	0.388741	0.669857	0.89978	1	0.97619	0.954656	0.86409	0.995184	3	1
1537	E	2023-05-11 08:00:00	0.806386	0.676221	0.606033	0.945722	1	0.998089	0.997653	0.952542	0.9988	2	1
1538	F	2023-05-11 08:00:00	0.749202	0.474458	0.537925	0.844601	1	0.991204	0.983989	0.933101	0.998315	4	1
1539	G	2023-05-11 08:00:00	0.650218	0.429039	0.548401	0.907851	1	0.986351	0.970627	0.886418	0.998369	3	1
1540	H	2023-05-11 08:00:00	0.69045	0.378553	0.665721	0.904882	1	0.975736	0.962601	0.84217	0.994803	3	1
1541	I	2023-05-11 08:00:00	0.805225	0.653602	0.583845	0.420651	0.999408	0.981802	0.98728	0.920282	0.993629	6	1
1542	G	2023-05-11 08:00:00	0.581422	0.437001	0.523748	0.844931	0.948388	0.952381	0.949981	0.30896	0.996216	4	1
1543	I	2023-05-11 08:00:00	0.870827	0.623564	0.541273	0.645481	1	0.953594	0.975964	0.918543	0.9829	6	1
1544	H	2023-05-11 08:00:00	0.595065	0.566455	0.673736	0.925863	0.982387	0.976099	0.94025	0.790547	0.997267	2	1
1545	J	2023-05-11 08:00:00	0.647025	0.554621	0.630514	0.890477	1	0.973006	0.977829	0.910184	0.989469	3	1
1546	H	2023-05-11 08:00:00	0.617997	0.48119	0.564115	0.913086	0.997589	0.97522	0.935595	0.83629	0.994558	3	1
1547	J	2023-05-11 08:00:00	0.765167	0.754393	0.525559	0.907411	1	0.980588	0.991974	0.919532	0.995343	3	1
1548	I	2023-05-11 08:00:00	0.72148	0.399725	0.663083	0.819024	0.991718	0.984531	0.979294	0.905138	0.997954	4	1
1549	J	2023-05-11 08:00:00	0.845864	0.697212	0.542691	0.898395	1	0.974644	0.977228	0.927911	0.990965	3	1
1550	K	2023-05-11 08:00:00	0.68418	0.668802	0.622007	0.855795	0.984176	0.964968	0.978492	0.89171	0.991632	4	1
1551	H	2023-05-11 08:00:00	0.609869	0.579357	0.743352	0.898592	0.988361	0.975887	0.945186	0.799491	0.994207	3	1
1552	L	2023-05-11 08:00:00	0.675472	0.680021	0.616966	0.964592	1	0.99545	0.985153	0.93066	0.997984	1	1
1553	F	2023-05-11 08:00:00	0.662119	0.661998	0.621456	0.910183	1	0.99357	0.980759	0.921934	0.999187	3	1
1554	M	2023-05-11 08:00:00	0.644993	0.525487	0.626103	0.901803	0.999852	0.981802	0.992857	0.809158	0.993826	4	1
1555	J	2023-05-11 08:00:00	0.711176	0.663916	0.542927	0.908511	1	0.972702	0.980699	0.914695	0.983287	3	1
1556	N	2023-05-11 08:00:00	0.685631	0.624468	0.594951	0.922146	0.993582	0.981165	0.956562	0.930863	0.994648	2	1
1557	O	2023-05-11 08:00:00	0.691437	0.657221	0.584987	0.937783	0.993463	0.985017	0.955519	0.939252	0.994968	2	1
1558	N	2023-05-11 08:00:00	0.83373	0.661745	0.888823	0.954805	0.998521	0.971489	0.971088	0.891274	0.999232	4	1
1559	P	2023-05-11 08:00:00	0.775617	0.554802	0.510358	0.914713	1	0.99175	0.974579	0.909892	0.9985	3	1
1560	Q	2023-05-11 08:00:00	0.722206	0.587681	0.499606	0.932043	1	0.995663	0.964306	0.952806	0.999608	2	1
1561	H	2023-05-11 08:00:00	0.601742	0.497078	0.596881	0.869079	1	0.959114	0.939468	0.765732	0.995679	4	1
1562	R	2023-05-11 08:00:00	0.592337	0.510975	0.471054	0.854519	1	0.963148	0.96854	0.807269	0.996904	4	1
1563	S	2023-05-11 08:00:00	0.683309	0.504859	0.384255	0.810556	0.930671	0.922778	0.908469	0.62047	0.995679	4	1
1564	T	2023-05-11 08:00:00	0.714078	0.547202	0.590855	0.957137	1	0.994844	0.948877	0.842764	0.995682	2	1
1565	D	2023-05-11 08:00:00	0.668795	0.756564	0.626221	0.891621	1	0.989688	0.987059	0.964214	0.998002	3	1
1566	I	2023-05-11 08:00:00	0.675181	0.738792	0.816241	0.577744	1	0.988171	0.982364	0.931628	0.995441	6	1
1567	A	2023-05-11 12:00:00	0.609579	0.693231	0.67604	0.84605	0.991925	0.972975	0.985291	0.859494	0.987991	4	1
1568	B	2023-05-11 12:00:00	0.63164	0.461611	0.551276	0.896987	1	0.978465	0.967457	0.892927	0.99739	3	1
1569	C	2023-05-11 12:00:00	0.793904	0.624686	0.547417	0.927337	0.999246	0.988201	0.956763	0.899251	0.999624	3	1
1570	H	2023-05-11 12:00:00	0.541655	0.351067	0.623188	0.895799	1	0.976433	0.954094	0.86412	0.995395	3	1
1571	E	2023-05-11 12:00:00	0.74688	0.65143	0.575733	0.950121	1	0.998332	0.997873	0.953288	0.998577	2	1
1572	F	2023-05-11 12:00:00	0.669086	0.37222	0.455931	0.73455	1	0.990567	0.982023	0.933234	0.998193	5	1
1573	G	2023-05-11 12:00:00	0.624383	0.387601	0.523472	0.904992	1	0.987261	0.969583	0.886215	0.998369	3	1
1574	H	2023-05-11 12:00:00	0.665283	0.352496	0.637012	0.888982	1	0.976645	0.961939	0.841906	0.994778	3	1
1575	I	2023-05-11 12:00:00	0.777068	0.64564	0.574039	0.696899	0.999852	0.979678	0.985875	0.916856	0.993613	5	1
1576	G	2023-05-11 12:00:00	0.570972	0.427049	0.504175	0.843831	0.956522	0.95875	0.949138	0.323139	0.997165	4	1
1577	I	2023-05-11 12:00:00	0.854282	0.623926	0.539579	0.638003	1	0.954201	0.980077	0.92036	0.983562	6	1
1578	H	2023-05-11 12:00:00	0.584035	0.564573	0.666927	0.92208	0.98286	0.975766	0.941394	0.789579	0.997354	2	1
1579	J	2023-05-11 12:00:00	0.624383	0.555525	0.63646	0.897515	1	0.972399	0.979575	0.910877	0.989021	3	1
1580	H	2023-05-11 12:00:00	0.562264	0.438974	0.521424	0.905608	0.99827	0.975614	0.938665	0.839267	0.994621	3	1
1581	J	2023-05-11 12:00:00	0.687954	0.739554	0.516738	0.904772	1	0.966333	0.985373	0.920425	0.991832	3	1
1582	I	2023-05-11 12:00:00	0.688215	0.343811	0.653119	0.811106	0.996599	0.983621	0.982424	0.906841	0.997673	6	1
1583	J	2023-05-11 12:00:00	0.817417	0.699021	0.532294	0.901473	1	0.975068	0.943581	0.930463	0.990522	3	1
1584	K	2023-05-11 12:00:00	0.642671	0.665364	0.617557	0.858368	0.987578	0.965969	0.97809	0.893065	0.991579	4	1
1585	H	2023-05-11 12:00:00	0.604064	0.577366	0.741324	0.90563	0.983156	0.97431	0.944744	0.799288	0.993601	3	1
1586	L	2023-05-11 12:00:00	0.620319	0.647269	0.584672	0.967451	1	0.99545	0.984511	0.931066	0.998042	1	1
1587	F	2023-05-11 12:00:00	0.599419	0.664676	0.586445	0.911128	1	0.993843	0.978993	0.921663	0.999167	3	1
1588	M	2023-05-11 12:00:00	0.638607	0.523316	0.626103	0.907543	1	0.983015	0.993279	0.810477	0.993802	4	1
1589	J	2023-05-11 12:00:00	0.686212	0.657221	0.54017	0.870244	1	0.972096	0.980739	0.914966	0.98331	4	1
1590	N	2023-05-11 12:00:00	0.632801	0.584007	0.54974	0.922146	0.993848	0.985987	0.956763	0.930796	0.995133	2	1
1591	O	2023-05-11 12:00:00	0.627576	0.611802	0.550882	0.936596	0.993715	0.984349	0.957465	0.939455	0.9955	2	1
1592	N	2023-05-11 12:00:00	0.839158	0.663554	0.883073	0.95243	0.998373	0.972096	0.969664	0.890231	0.999262	4	1
1593	P	2023-05-11 12:00:00	0.77881	0.555887	0.515359	0.909875	1	0.991659	0.974519	0.910772	0.998919	3	1
1594	Q	2023-05-11 12:00:00	0.714659	0.579864	0.502481	0.938047	1	0.995602	0.977549	0.953268	0.999519	2	1
1595	H	2023-05-11 12:00:00	0.561684	0.504859	0.59885	0.890895	1	0.960479	0.94031	0.781021	0.995857	3	1
1596	R	2023-05-11 12:00:00	0.52566	0.470496	0.341564	0.844777	0.999349	0.958477	0.966112	0.807742	0.995469	4	1
1597	S	2023-05-11 12:00:00	0.681277	0.500335	0.366493	0.806598	0.958474	0.930755	0.910636	0.619807	0.995952	4	1
1598	T	2023-05-11 12:00:00	0.706821	0.540506	0.599047	0.95353	1	0.995147	0.950101	0.843434	0.995739	2	1
1599	I	2023-05-11 12:00:00	0.671698	0.740214	0.822936	0.579723	1	0.988747	0.982926	0.932386	0.995495	6	1
1600	A	2023-05-11 16:00:00	0.605225	0.68925	0.668951	0.848082	0.992694	0.974371	0.985247	0.857938	0.990139	4	1
1601	B	2023-05-11 16:00:00	0.576488	0.359553	0.550567	0.895975	1	0.979678	0.968841	0.894841	0.997418	3	1
1602	C	2023-05-11 16:00:00	0.793904	0.615982	0.537413	0.928062	0.999719	0.989506	0.967236	0.899643	0.999631	3	1
1603	H	2023-05-11 16:00:00	0.541655	0.340571	0.619644	0.887838	1	0.975129	0.953833	0.863896	0.995205	6	1
1604	E	2023-05-11 16:00:00	0.700145	0.619764	0.567482	0.94735	1	0.998332	0.998134	0.953788	0.998734	2	1
1605	F	2023-05-11 16:00:00	0.63164	0.336572	0.421432	0.809985	1	0.990355	0.982785	0.932963	0.997881	6	1
1606	G	2023-05-11 16:00:00	0.620319	0.373668	0.518864	0.901693	1	0.986958	0.970205	0.886418	0.998322	3	1
1607	H	2023-05-11 16:00:00	0.652337	0.346706	0.624291	0.882758	1	0.976342	0.961899	0.841698	0.994309	6	1
1608	I	2023-05-11 16:00:00	0.773295	0.639849	0.571794	0.718188	1	0.978465	0.986196	0.913441	0.992868	5	1
1609	G	2023-05-11 16:00:00	0.563164	0.428316	0.489603	0.845832	0.954008	0.959357	0.951686	0.312782	0.99664	4	1
1610	I	2023-05-11 16:00:00	0.846154	0.626097	0.53698	0.633605	1	0.956627	0.977649	0.922286	0.984667	6	1
1611	H	2023-05-11 16:00:00	0.577068	0.565984	0.675394	0.920739	0.982032	0.975554	0.933488	0.789855	0.997257	2	1
1612	J	2023-05-11 16:00:00	0.617126	0.55444	0.634806	0.896195	1	0.972096	0.978953	0.911501	0.988728	3	1
1613	H	2023-05-11 16:00:00	0.548041	0.428171	0.515202	0.908027	0.998299	0.97519	0.936879	0.839673	0.994559	3	1
1614	J	2023-05-11 16:00:00	0.699565	0.731593	0.516541	0.905652	1	0.967243	0.985695	0.91914	0.992827	3	1
1615	I	2023-05-11 16:00:00	0.665602	0.337658	0.653158	0.813086	0.992162	0.984835	0.981501	0.904649	0.998207	6	1
1616	J	2023-05-11 16:00:00	0.78897	0.693412	0.529301	0.902133	1	0.974856	0.959892	0.929914	0.990367	3	1
1617	K	2023-05-11 16:00:00	0.612772	0.663916	0.619093	0.867407	0.988169	0.965787	0.976886	0.893927	0.991576	4	1
1618	H	2023-05-11 16:00:00	0.633091	0.577113	0.73637	0.89382	0.987459	0.975038	0.943942	0.799257	0.993756	3	1
1619	L	2023-05-11 16:00:00	0.588389	0.614697	0.578371	0.965252	1	0.995147	0.985935	0.931066	0.997797	2	1
1620	F	2023-05-11 16:00:00	0.548041	0.621718	0.579198	0.906246	1	0.993631	0.979013	0.924775	0.999047	3	1
1621	M	2023-05-11 16:00:00	0.607257	0.500878	0.597787	0.91038	1	0.984228	0.995044	0.809692	0.994513	4	1
1622	J	2023-05-11 16:00:00	0.67344	0.657583	0.544502	0.896415	1	0.971793	0.980538	0.915372	0.983439	3	1
1623	N	2023-05-11 16:00:00	0.607837	0.557552	0.539698	0.922146	0.994957	0.987898	0.957405	0.93066	0.995346	2	1
1624	O	2023-05-11 16:00:00	0.608418	0.585745	0.555805	0.942578	0.994809	0.98438	0.954897	0.939928	0.995579	2	1
1625	N	2023-05-11 16:00:00	0.818636	0.659754	0.865745	0.949769	0.998373	0.971186	0.969403	0.893955	0.999197	4	1
1626	P	2023-05-11 16:00:00	0.781713	0.536344	0.501536	0.91104	1	0.991598	0.973576	0.909757	0.998146	3	1
1627	Q	2023-05-11 16:00:00	0.703338	0.529287	0.498228	0.93653	1	0.995996	0.978793	0.953857	0.999544	2	1
1628	H	2023-05-11 16:00:00	0.556749	0.492011	0.594124	0.885243	1	0.960176	0.94015	0.772091	0.99586	3	1
1629	R	2023-05-11 16:00:00	0.491611	0.466623	0.274457	0.831713	0.998743	0.958083	0.965711	0.810381	0.990289	4	1
1630	S	2023-05-11 16:00:00	0.68418	0.528202	0.472157	0.807939	0.941526	0.92933	0.912743	0.617047	0.99544	4	1
1631	T	2023-05-11 16:00:00	0.695501	0.538335	0.603025	0.95353	1	0.995147	0.948276	0.843948	0.995938	2	1
1632	I	2023-05-11 16:00:00	0.675181	0.739508	0.670132	0.577304	1	0.98808	0.983668	0.932791	0.995549	6	1
1633	A	2023-05-11 20:00:00	0.591292	0.682735	0.668163	0.850306	0.99472	0.977828	0.98487	0.857261	0.99265	4	1
1634	B	2023-05-11 20:00:00	0.607547	0.437363	0.631892	0.897031	1	0.980892	0.96854	0.893015	0.997349	3	1
1635	C	2023-05-11 20:00:00	0.790711	0.602501	0.521739	0.923752	1	0.986837	0.963363	0.899968	0.999578	3	1
1636	H	2023-05-11 20:00:00	0.613353	0.442357	0.669542	0.893116	1	0.976039	0.953171	0.863533	0.995512	3	1
1637	E	2023-05-11 20:00:00	0.719594	0.623202	0.582861	0.951836	1	0.998453	0.997933	0.953517	0.998774	2	1
1638	F	2023-05-11 20:00:00	0.661538	0.374934	0.498267	0.791401	1	0.990901	0.98417	0.932141	0.998267	4	1
1639	G	2023-05-11 20:00:00	0.602322	0.35883	0.503505	0.902573	1	0.986351	0.969182	0.88635	0.998299	3	1
1640	H	2023-05-11 20:00:00	0.656517	0.347791	0.630356	0.882472	1	0.976949	0.964306	0.842139	0.994221	6	1
1641	I	2023-05-11 20:00:00	0.801161	0.641116	0.579828	0.725423	1	0.974826	0.983066	0.911119	0.991131	5	1
1642	G	2023-05-11 20:00:00	0.57611	0.438449	0.528986	0.8415	0.95386	0.956021	0.951807	0.323186	0.996206	4	1
1643	I	2023-05-11 20:00:00	0.850218	0.633154	0.540643	0.637783	1	0.956627	0.979254	0.923766	0.986045	6	1
1644	H	2023-05-11 20:00:00	0.57939	0.565152	0.669837	0.921575	0.978009	0.976221	0.937882	0.788123	0.997355	2	1
1645	J	2023-05-11 20:00:00	0.623803	0.557697	0.636854	0.891577	1	0.972096	0.979515	0.91183	0.988763	3	1
1646	H	2023-05-11 20:00:00	0.580552	0.44927	0.540367	0.905982	0.998639	0.975827	0.937361	0.838996	0.994232	3	1
1647	J	2023-05-11 20:00:00	0.761393	0.739374	0.51851	0.929404	1	0.987868	0.992356	0.917827	0.997971	2	1
1648	I	2023-05-11 20:00:00	0.667431	0.418906	0.657491	0.813745	0.995416	0.984228	0.982143	0.905784	0.998044	4	1
1649	J	2023-05-11 20:00:00	0.797388	0.693954	0.534026	0.901034	1	0.974826	0.963343	0.929428	0.990657	3	1
1650	K	2023-05-11 20:00:00	0.624093	0.667716	0.626497	0.855355	0.987726	0.966242	0.978231	0.893311	0.991506	4	1
1651	H	2023-05-11 20:00:00	0.633672	0.577783	0.742545	0.900902	0.988021	0.976615	0.945467	0.799405	0.994153	3	1
1652	L	2023-05-11 20:00:00	0.602903	0.623202	0.599244	0.965472	1	0.995147	0.984792	0.930593	0.997715	2	1
1653	F	2023-05-11 20:00:00	0.573875	0.641406	0.611059	0.906246	1	0.992812	0.981301	0.922813	0.999085	3	1
1654	M	2023-05-11 20:00:00	0.611611	0.507754	0.609995	0.908621	1	0.984835	0.992155	0.809344	0.99465	4	1
1655	J	2023-05-11 20:00:00	0.698984	0.660116	0.545684	0.906752	1	0.972399	0.980578	0.915575	0.983345	3	1
1656	N	2023-05-11 20:00:00	0.628157	0.618316	0.59759	0.921399	0.992739	0.986685	0.95584	0.935802	0.993901	2	1
1657	O	2023-05-11 20:00:00	0.630189	0.646907	0.606884	0.935562	0.992798	0.98441	0.956662	0.940334	0.994739	2	1
1658	N	2023-05-11 20:00:00	0.776981	0.637316	0.681553	0.936156	0.998373	0.972096	0.966273	0.89739	0.998873	2	1
1659	P	2023-05-11 20:00:00	0.770682	0.522049	0.485153	0.909743	1	0.991598	0.973536	0.90908	0.998078	3	1
1660	Q	2023-05-11 20:00:00	0.703048	0.521162	0.497401	0.937057	1	0.995723	0.978371	0.953539	0.99953	2	1
1661	H	2023-05-11 20:00:00	0.580261	0.480249	0.600425	0.869035	1	0.958386	0.939528	0.752405	0.995924	4	1
1662	R	2023-05-11 20:00:00	0.497823	0.490002	0.342785	0.853596	0.996776	0.971186	0.973777	0.811125	0.994231	4	1
1663	S	2023-05-11 20:00:00	0.680116	0.523135	0.395085	0.808467	0.962038	0.925417	0.903132	0.618386	0.99552	4	1
1664	T	2023-05-11 20:00:00	0.699274	0.544487	0.594282	0.959094	1	0.995147	0.944624	0.843177	0.995866	2	1
1665	I	2023-05-11 20:00:00	0.675472	0.741291	0.820967	0.574885	1	0.98987	0.984109	0.93269	0.995542	6	1
1666	A	2023-05-12 04:00:00	0.598549	0.685269	0.677221	0.851177	0.994928	0.978314	0.985809	0.856923	0.99311	4	1
1667	B	2023-05-12 04:00:00	0.70566	0.668621	0.687618	0.891731	0.990831	0.974219	0.96549	0.886118	0.997106	3	1
1668	C	2023-05-12 04:00:00	0.800871	0.635778	0.550488	0.942709	1	0.98993	0.960274	0.899731	0.999519	3	1
1669	H	2023-05-12 04:00:00	0.666473	0.494508	0.686712	0.895931	1	0.973946	0.95277	0.86205	0.994894	3	1
1670	E	2023-05-12 04:00:00	0.763135	0.681831	0.630573	0.953002	1	0.998453	0.997773	0.952682	0.998769	2	1
1671	F	2023-05-12 04:00:00	0.695501	0.461611	0.596251	0.810776	1	0.991386	0.98437	0.931991	0.998311	4	1
1672	G	2023-05-12 04:00:00	0.587518	0.414201	0.542179	0.902573	1	0.987564	0.970667	0.886012	0.998451	3	1
1673	H	2023-05-12 04:00:00	0.669028	0.379277	0.667966	0.903871	1	0.979375	0.96537	0.843794	0.995346	3	1
1674	I	2023-05-12 04:00:00	0.845864	0.645278	0.588768	0.707455	1	0.970579	0.980739	0.909266	0.988813	5	1
1675	G	2023-05-12 04:00:00	0.556807	0.392487	0.411862	0.822278	0.984324	0.951168	0.948015	0.366139	0.996627	4	1
1676	I	2023-05-12 04:00:00	0.853701	0.637859	0.543636	0.634484	1	0.959054	0.98112	0.926972	0.986541	6	1
1677	H	2023-05-12 04:00:00	0.591292	0.569006	0.671463	0.923796	0.982993	0.975705	0.938685	0.784792	0.997471	2	1
1678	J	2023-05-12 04:00:00	0.63164	0.560049	0.639926	0.891577	1	0.971489	0.980337	0.912735	0.988308	3	1
1679	H	2023-05-12 04:00:00	0.609579	0.504949	0.601055	0.913789	0.998432	0.973794	0.935736	0.835343	0.993822	3	1
1680	J	2023-05-12 04:00:00	0.773004	0.783526	0.545959	0.933143	1	0.989384	0.991593	0.915703	0.998071	2	1
1681	I	2023-05-12 04:00:00	0.703716	0.491287	0.674346	0.813811	0.997338	0.983925	0.981581	0.906998	0.997787	4	1
1682	J	2023-05-12 04:00:00	0.8418	0.696307	0.542336	0.901693	1	0.975281	0.965972	0.929624	0.990635	3	1
1683	K	2023-05-12 04:00:00	0.657765	0.67405	0.640162	0.862107	0.988613	0.965787	0.978271	0.890936	0.991045	4	1
1684	H	2023-05-12 04:00:00	0.636284	0.583772	0.745514	0.895821	0.987563	0.976251	0.946008	0.798778	0.994222	3	1
1685	L	2023-05-12 04:00:00	0.634833	0.678935	0.644534	0.965472	0.999261	0.995147	0.985032	0.930052	0.997925	2	1
1686	F	2023-05-12 04:00:00	0.635704	0.667951	0.651977	0.913152	1	0.993085	0.980237	0.920513	0.999095	3	1
1687	M	2023-05-12 04:00:00	0.634543	0.513001	0.623385	0.908621	1	0.984835	0.992155	0.809858	0.995555	4	1
1688	J	2023-05-12 04:00:00	0.707402	0.665907	0.548834	0.905872	1	0.973309	0.980097	0.91571	0.983497	3	1
1689	N	2023-05-12 04:00:00	0.654862	0.628449	0.63201	0.91777	0.993123	0.979739	0.958348	0.92606	0.994145	2	1
1690	O	2023-05-12 04:00:00	0.665602	0.683097	0.635594	0.939433	0.991541	0.984622	0.955739	0.937561	0.994894	2	1
1691	N	2023-05-12 04:00:00	0.783599	0.649259	0.706482	0.936156	0.998373	0.972096	0.966273	0.895129	0.998877	2	1
1692	P	2023-05-12 04:00:00	0.772134	0.510287	0.475543	0.913481	1	0.991629	0.974419	0.909419	0.997596	3	1
1693	Q	2023-05-12 04:00:00	0.691727	0.597362	0.511303	0.937057	1	0.995723	0.978371	0.95331	0.999557	2	1
1694	H	2023-05-12 04:00:00	0.595356	0.486582	0.616178	0.868617	1	0.956779	0.939488	0.744085	0.995305	4	1
1695	R	2023-05-12 04:00:00	0.53611	0.563361	0.559507	0.847196	0.994602	0.954959	0.9624	0.80321	0.997232	4	1
1696	S	2023-05-12 04:00:00	0.676343	0.544306	0.367163	0.806708	0.966164	0.929148	0.907245	0.620957	0.996153	4	1
1697	T	2023-05-12 04:00:00	0.702758	0.547744	0.595266	0.959094	1	0.995147	0.948055	0.843258	0.995729	2	1
1698	D	2023-05-12 04:00:00	0.695791	0.754393	0.637563	0.894678	1	0.990052	0.989366	0.962997	0.998002	3	1
1699	I	2023-05-12 04:00:00	0.675472	0.7445	0.829238	0.574885	1	0.988444	0.981782	0.932088	0.995653	6	1
1700	A	2023-05-12 08:00:00	0.591292	0.687078	0.681553	0.856112	0.995578	0.978314	0.984784	0.86105	0.993387	4	1
1701	B	2023-05-12 08:00:00	0.699855	0.621573	0.628938	0.891599	1	0.979375	0.970125	0.890061	0.997478	3	1
1702	C	2023-05-12 08:00:00	0.797968	0.627671	0.54147	0.924522	1	0.989142	0.963885	0.89984	0.999613	3	1
1703	H	2023-05-12 08:00:00	0.584615	0.360494	0.661704	0.896239	1	0.974553	0.955478	0.863524	0.994927	3	1
1704	E	2023-05-12 08:00:00	0.774165	0.683278	0.626	0.941852	1	0.998241	0.997853	0.952509	0.998782	2	1
1705	F	2023-05-12 08:00:00	0.687373	0.403163	0.54848	0.818276	1	0.991962	0.984711	0.932828	0.998284	4	1
1706	G	2023-05-12 08:00:00	0.565747	0.408049	0.537138	0.91269	1	0.988474	0.972232	0.887027	0.998346	3	1
1707	H	2023-05-12 08:00:00	0.662061	0.36082	0.655876	0.892259	1	0.978465	0.964808	0.845221	0.99477	3	1
1708	I	2023-05-12 08:00:00	0.832801	0.644373	0.581522	0.708621	1	0.969366	0.980899	0.910332	0.987859	5	1
1709	G	2023-05-12 08:00:00	0.558229	0.404068	0.455577	0.810073	0.982254	0.943282	0.944022	0.35767	0.993899	4	1
1710	I	2023-05-12 08:00:00	0.833382	0.64003	0.546865	0.634484	1	0.96148	0.977689	0.929785	0.987102	6	1
1711	H	2023-05-12 08:00:00	0.591292	0.569821	0.672956	0.922015	0.982904	0.975887	0.943741	0.784901	0.997424	2	1
1712	J	2023-05-12 08:00:00	0.627866	0.560049	0.640162	0.890477	1	0.971489	0.978772	0.913315	0.988325	3	1
1713	H	2023-05-12 08:00:00	0.588099	0.486745	0.582034	0.909611	0.998595	0.974462	0.935254	0.835817	0.993548	3	1
1714	J	2023-05-12 08:00:00	0.745718	0.764526	0.52422	0.933363	1	0.991204	0.99053	0.916414	0.998522	2	1
1715	I	2023-05-12 08:00:00	0.701713	0.468668	0.669266	0.820585	0.995711	0.985138	0.981782	0.907538	0.997944	4	1
1716	J	2023-05-12 08:00:00	0.833962	0.697392	0.544542	0.901473	1	0.975887	0.958889	0.929015	0.990904	3	1
1717	K	2023-05-12 08:00:00	0.646444	0.671516	0.636342	0.867979	0.989352	0.965544	0.979094	0.890934	0.990904	4	1
1718	H	2023-05-12 08:00:00	0.629028	0.582777	0.749472	0.902551	0.987933	0.976403	0.944483	0.799109	0.994378	3	1
1719	L	2023-05-12 08:00:00	0.637736	0.682735	0.640595	0.965032	0.999113	0.99545	0.98423	0.930255	0.997937	1	1
1720	F	2023-05-12 08:00:00	0.625254	0.655122	0.630002	0.931163	1	0.993085	0.981762	0.920851	0.999143	2	1
1721	M	2023-05-12 08:00:00	0.629318	0.510287	0.621495	0.917352	1	0.987261	0.994242	0.809052	0.995769	3	1
1722	J	2023-05-12 08:00:00	0.699565	0.664097	0.549228	0.893556	1	0.973006	0.980478	0.915845	0.983486	3	1
1723	N	2023-05-12 08:00:00	0.647025	0.601162	0.607987	0.919793	0.99438	0.985623	0.95907	0.927684	0.995003	2	1
1724	O	2023-05-12 08:00:00	0.65312	0.65885	0.60586	0.931581	0.992044	0.984107	0.956261	0.937899	0.995417	2	1
1725	N	2023-05-12 08:00:00	0.824644	0.661926	0.765005	0.93477	0.997338	0.970883	0.966574	0.890083	0.998885	3	1
1726	P	2023-05-12 08:00:00	0.728302	0.440077	0.433522	0.906444	1	0.991477	0.974218	0.91023	0.993868	3	1
1727	Q	2023-05-12 08:00:00	0.695501	0.612978	0.515438	0.938355	1	0.995693	0.977749	0.953092	0.999514	2	1
1728	H	2023-05-12 08:00:00	0.58897	0.500335	0.606333	0.890697	1	0.958174	0.938625	0.775271	0.995447	3	1
1729	R	2023-05-12 08:00:00	0.550102	0.541158	0.50894	0.848977	0.996658	0.956142	0.960575	0.801383	0.9971	4	1
1730	S	2023-05-12 08:00:00	0.669956	0.528021	0.287728	0.79956	0.98008	0.928389	0.908028	0.623676	0.995825	4	1
1731	T	2023-05-12 08:00:00	0.699274	0.553354	0.603694	0.957422	1	0.995147	0.945186	0.843157	0.995674	2	1
1732	D	2023-05-12 08:00:00	0.661829	0.749145	0.625906	0.893402	1	0.989748	0.987801	0.963132	0.998261	3	1
1733	I	2023-05-12 08:00:00	0.671118	0.74342	0.831601	0.576864	1	0.989172	0.983046	0.931865	0.995651	6	1
1734	A	2023-05-12 12:00:00	0.580261	0.687983	0.678009	0.855047	0.995756	0.977768	0.98559	0.864973	0.993102	4	1
1735	B	2023-05-12 12:00:00	0.637446	0.431211	0.543045	0.897669	1	0.980285	0.970245	0.893314	0.997576	3	1
1736	C	2023-05-12 12:00:00	0.780842	0.541031	0.472708	0.915417	1	0.984986	0.963805	0.900185	0.999496	4	1
1737	H	2023-05-12 12:00:00	0.498694	0.332953	0.643904	0.875236	0.998639	0.967759	0.948296	0.861203	0.992677	6	1
1738	E	2023-05-12 12:00:00	0.731495	0.653059	0.591076	0.951792	1	0.998514	0.997873	0.953167	0.998807	2	1
1739	F	2023-05-12 12:00:00	0.616836	0.33241	0.464319	0.811106	1	0.990992	0.982966	0.932015	0.997983	6	1
1740	G	2023-05-12 12:00:00	0.529463	0.368601	0.533239	0.906092	1	0.986958	0.971048	0.8852	0.998299	3	1
1741	H	2023-05-12 12:00:00	0.639216	0.33603	0.636657	0.884825	1	0.975736	0.965791	0.846109	0.995586	6	1
1742	I	2023-05-12 12:00:00	0.798258	0.640211	0.579159	0.702661	1	0.96785	0.979073	0.912064	0.98727	5	1
1743	G	2023-05-12 12:00:00	0.541945	0.410582	0.499015	0.801583	0.979148	0.937216	0.9435	0.35869	0.993497	4	1
1744	I	2023-05-12 12:00:00	0.79971	0.638402	0.554033	0.631845	1	0.962693	0.977549	0.931388	0.987723	6	1
1745	H	2023-05-12 12:00:00	0.580261	0.569332	0.671353	0.918078	0.983156	0.975614	0.943179	0.786364	0.997432	2	1
1746	J	2023-05-12 12:00:00	0.616546	0.556973	0.640438	0.888058	1	0.971793	0.979294	0.913578	0.988235	3	1
1747	H	2023-05-12 12:00:00	0.544267	0.451749	0.550803	0.909787	0.998477	0.975159	0.937421	0.837846	0.994087	3	1
1748	I	2023-05-12 12:00:00	0.654107	0.337115	0.635712	0.820585	0.995711	0.985138	0.981782	0.907638	0.998202	6	1
1749	J	2023-05-12 12:00:00	0.825544	0.700288	0.539028	0.900594	1	0.975099	0.962461	0.930557	0.990389	3	1
1750	K	2023-05-12 12:00:00	0.602032	0.667716	0.631498	0.864966	0.991127	0.965878	0.977468	0.893893	0.990737	4	1
1751	H	2023-05-12 12:00:00	0.618287	0.585093	0.751	0.903739	0.987459	0.976858	0.941574	0.799497	0.994404	3	1
1752	L	2023-05-12 12:00:00	0.611611	0.646364	0.607514	0.968771	0.998965	0.995147	0.984631	0.930525	0.998042	2	1
1753	F	2023-05-12 12:00:00	0.577649	0.611277	0.586957	0.915439	1	0.993873	0.9812	0.921325	0.99925	3	1
1754	M	2023-05-12 12:00:00	0.61045	0.504135	0.612752	0.918012	1	0.987564	0.995345	0.809657	0.995948	3	1
1755	J	2023-05-12 12:00:00	0.68447	0.660478	0.54844	0.904992	1	0.972399	0.980578	0.916116	0.983264	3	1
1756	N	2023-05-12 12:00:00	0.613062	0.580298	0.565966	0.920035	0.99373	0.987777	0.958047	0.925452	0.99507	2	1
1757	O	2023-05-12 12:00:00	0.604064	0.613792	0.569707	0.936332	0.992369	0.984107	0.957485	0.937493	0.995778	2	1
1758	N	2023-05-12 12:00:00	0.79106	0.658307	0.791903	0.944975	0.99793	0.971489	0.967296	0.893027	0.999035	3	1
1759	P	2023-05-12 12:00:00	0.741364	0.469392	0.460106	0.914779	1	0.991811	0.973817	0.910028	0.997166	3	1
1760	Q	2023-05-12 12:00:00	0.696662	0.648173	0.523708	0.939103	1	0.995511	0.977268	0.953459	0.999322	2	1
1761	H	2023-05-12 12:00:00	0.573585	0.529649	0.599244	0.869013	1	0.954777	0.934351	0.807945	0.99348	4	1
1762	R	2023-05-12 12:00:00	0.548882	0.494454	0.450457	0.850451	0.997161	0.958356	0.963303	0.800842	0.996769	4	1
1763	S	2023-05-12 12:00:00	0.656313	0.469935	0.150362	0.789839	0.989293	0.924962	0.914287	0.627221	0.994898	4	1
1764	T	2023-05-12 12:00:00	0.695791	0.550821	0.604954	0.956763	1	0.995147	0.947473	0.843529	0.995689	2	1
1765	D	2023-05-12 12:00:00	0.62061	0.733764	0.615784	0.891907	1	0.988747	0.987841	0.963606	0.998204	3	1
1766	I	2023-05-12 12:00:00	0.74746	0.727727	0.809546	0.578843	1	0.984137	0.981702	0.931993	0.994042	6	1
1767	A	2023-05-12 16:00:00	0.576488	0.686716	0.667769	0.854854	0.995889	0.977373	0.985739	0.867341	0.993159	4	1
1768	B	2023-05-12 16:00:00	0.592163	0.352134	0.553363	0.895206	1	0.979678	0.969784	0.894369	0.997361	3	1
1769	C	2023-05-12 16:00:00	0.762845	0.50475	0.463099	0.91313	1	0.986109	0.963083	0.901044	0.999513	4	1
1770	H	2023-05-12 16:00:00	0.516691	0.361218	0.608066	0.877634	0.999113	0.971125	0.953392	0.859357	0.993988	3	1
1771	E	2023-05-12 16:00:00	0.696662	0.624468	0.583058	0.955201	1	0.998605	0.998435	0.953529	0.998671	2	1
1772	F	2023-05-12 16:00:00	0.604644	0.317572	0.453095	0.816274	1	0.991143	0.983648	0.931853	0.997827	6	1
1773	G	2023-05-12 16:00:00	0.518723	0.33603	0.536823	0.897295	1	0.986048	0.970727	0.884862	0.998381	6	1
1774	H	2023-05-12 16:00:00	0.626415	0.331687	0.631537	0.877898	1	0.976645	0.963163	0.846695	0.993718	6	1
1775	I	2023-05-12 16:00:00	0.792453	0.640211	0.576914	0.746184	1	0.964816	0.979274	0.913432	0.987023	5	1
1776	G	2023-05-12 16:00:00	0.547547	0.429944	0.553363	0.814691	0.967761	0.946315	0.944102	0.295971	0.99434	4	1
1777	I	2023-05-12 16:00:00	0.793033	0.64564	0.552418	0.630306	1	0.962693	0.978793	0.933129	0.988081	6	1
1778	H	2023-05-12 16:00:00	0.571843	0.567233	0.671515	0.91887	0.983156	0.974371	0.943621	0.786902	0.997205	2	1
1779	J	2023-05-12 16:00:00	0.616836	0.554621	0.642171	0.88344	1	0.970579	0.979575	0.91326	0.987753	3	1
1780	H	2023-05-12 16:00:00	0.529753	0.444167	0.5536	0.909787	0.998299	0.975887	0.936438	0.84062	0.994538	3	1
1781	I	2023-05-12 16:00:00	0.647518	0.354125	0.64607	0.811832	0.999408	0.983621	0.981481	0.908883	0.997739	4	1
1782	J	2023-05-12 16:00:00	0.805225	0.69305	0.542612	0.890037	1	0.974249	0.962982	0.929297	0.990244	3	1
1783	K	2023-05-12 16:00:00	0.573004	0.668621	0.634097	0.870596	0.992014	0.96609	0.978612	0.895844	0.991226	4	1
1784	H	2023-05-12 16:00:00	0.613643	0.583772	0.756246	0.90132	0.986616	0.976494	0.942698	0.799861	0.994137	3	1
1785	L	2023-05-12 16:00:00	0.597097	0.616868	0.594518	0.967671	0.998965	0.994844	0.984852	0.930119	0.997563	2	1
1786	F	2023-05-12 16:00:00	0.562845	0.598755	0.583412	0.912998	1	0.99354	0.973415	0.921122	0.999245	3	1
1787	M	2023-05-12 16:00:00	0.599129	0.502325	0.611452	0.921091	1	0.987868	0.995044	0.809354	0.996175	3	1
1788	J	2023-05-12 16:00:00	0.67344	0.658669	0.553954	0.904552	1	0.972399	0.981561	0.916319	0.982983	3	1
1789	N	2023-05-12 16:00:00	0.606676	0.557407	0.562382	0.919529	0.99444	0.987019	0.958006	0.927143	0.995145	2	1
1790	O	2023-05-12 16:00:00	0.605515	0.600945	0.577308	0.944073	0.993744	0.983925	0.95602	0.937831	0.995899	2	1
1791	N	2023-05-12 16:00:00	0.747866	0.63243	0.648433	0.944975	0.995268	0.972399	0.964006	0.900647	0.998898	2	1
1792	P	2023-05-12 16:00:00	0.738752	0.469754	0.473299	0.923664	1	0.991993	0.974238	0.909148	0.999639	3	1
1793	Q	2023-05-12 16:00:00	0.706821	0.63775	0.519731	0.939543	1	0.995663	0.976886	0.953597	0.999531	2	1
1794	H	2023-05-12 16:00:00	0.573585	0.537973	0.600819	0.874555	1	0.954292	0.931362	0.809636	0.992621	3	1
1795	R	2023-05-12 16:00:00	0.538258	0.490527	0.4898	0.841258	0.99793	0.958963	0.964728	0.802736	0.996077	4	1
1796	S	2023-05-12 16:00:00	0.661829	0.485678	0.318289	0.78808	0.975495	0.924901	0.913505	0.618386	0.993587	4	1
1797	T	2023-05-12 16:00:00	0.692598	0.552449	0.605545	0.954256	1	0.994237	0.94956	0.843495	0.995054	2	1
1798	D	2023-05-12 16:00:00	0.613643	0.740459	0.615666	0.896107	1	0.988353	0.989045	0.963538	0.998347	3	1
1799	I	2023-05-12 16:00:00	0.751234	0.718736	0.802457	0.591379	1	0.987382	0.982725	0.932223	0.997811	6	1
1800	A	2023-05-12 20:00:00	0.561974	0.685088	0.668163	0.850693	0.996125	0.978162	0.985644	0.867476	0.992785	4	1
1801	B	2023-05-12 20:00:00	0.619448	0.460525	0.6365	0.897603	1	0.980892	0.967757	0.892159	0.997231	3	1
1802	C	2023-05-12 20:00:00	0.759071	0.506252	0.484641	0.920937	1	0.988232	0.965129	0.900421	0.999537	3	1
1803	H	2023-05-12 20:00:00	0.577068	0.423882	0.714831	0.884715	0.99963	0.971307	0.951105	0.8582	0.993346	3	1
1804	E	2023-05-12 20:00:00	0.708563	0.633335	0.601323	0.947834	1	0.998544	0.997653	0.953261	0.998691	2	1
1805	F	2023-05-12 20:00:00	0.624093	0.352134	0.525559	0.819639	1	0.991174	0.984109	0.931552	0.998221	4	1
1806	G	2023-05-12 20:00:00	0.532946	0.349963	0.553875	0.897955	1	0.987261	0.97175	0.885336	0.998416	3	1
1807	H	2023-05-12 20:00:00	0.627605	0.329696	0.641895	0.877436	1	0.976645	0.965651	0.846981	0.995421	6	1
1808	I	2023-05-12 20:00:00	0.809579	0.643107	0.58101	0.688212	0.999408	0.9633	0.977007	0.914503	0.986223	5	1
1809	G	2023-05-12 20:00:00	0.578433	0.448401	0.594912	0.820805	0.957853	0.946618	0.943721	0.274837	0.994576	4	1
1810	I	2023-05-12 20:00:00	0.797097	0.637316	0.556041	0.630965	1	0.964816	0.980899	0.934646	0.989078	6	1
1811	H	2023-05-12 20:00:00	0.573004	0.572119	0.677989	0.919112	0.982727	0.97525	0.943942	0.786742	0.997473	2	1
1812	H	2023-05-12 20:00:00	0.555007	0.471871	0.575221	0.910336	0.998728	0.976463	0.935816	0.837846	0.994488	3	1
1813	I	2023-05-12 20:00:00	0.66897	0.418906	0.662728	0.812426	0.998817	0.983318	0.982304	0.909432	0.99769	4	1
1814	J	2023-05-12 20:00:00	0.78984	0.680926	0.541785	0.901473	1	0.975614	0.965771	0.927258	0.990425	3	1
1815	K	2023-05-12 20:00:00	0.591292	0.67224	0.640595	0.867385	0.991423	0.965666	0.977167	0.895075	0.991087	4	1
1816	H	2023-05-12 20:00:00	0.618287	0.587427	0.756026	0.902903	0.985211	0.97704	0.943039	0.800551	0.994525	3	1
1817	L	2023-05-12 20:00:00	0.608708	0.632792	0.618935	0.966351	0.998965	0.99454	0.984651	0.929849	0.997493	2	1
1818	F	2023-05-12 20:00:00	0.562845	0.616651	0.633822	0.913239	1	0.993297	0.980779	0.920851	0.999195	3	1
1819	M	2023-05-12 20:00:00	0.604064	0.502325	0.612752	0.924148	1	0.988171	0.995666	0.809743	0.996062	3	1
1820	J	2023-05-12 20:00:00	0.688244	0.665183	0.555135	0.897735	1	0.972702	0.979956	0.916184	0.983345	3	1
1821	N	2023-05-12 20:00:00	0.623512	0.581456	0.594794	0.918826	0.995726	0.987534	0.958749	0.926804	0.994948	2	1
1822	O	2023-05-12 20:00:00	0.625254	0.643288	0.609208	0.941918	0.993981	0.983348	0.958107	0.938102	0.995896	2	1
1823	N	2023-05-12 20:00:00	0.773498	0.64944	0.708491	0.944975	0.995268	0.972096	0.964668	0.897068	0.998916	2	1
1824	P	2023-05-12 20:00:00	0.710885	0.382353	0.405049	0.916428	1	0.991174	0.973496	0.90996	0.999486	3	1
1825	Q	2023-05-12 20:00:00	0.687954	0.614082	0.518746	0.937849	1	0.995329	0.977769	0.953767	0.999465	2	1
1826	H	2023-05-12 20:00:00	0.585196	0.494906	0.610665	0.874291	1	0.953958	0.937441	0.767694	0.994934	3	1
1827	R	2023-05-12 20:00:00	0.55463	0.507609	0.543242	0.853002	0.99892	0.959084	0.96537	0.805578	0.997274	4	1
1828	S	2023-05-12 20:00:00	0.665312	0.477535	0.387445	0.78322	0.970512	0.924355	0.915491	0.612791	0.993607	5	1
1829	T	2023-05-12 20:00:00	0.691437	0.547021	0.60393	0.955641	1	0.99454	0.94954	0.843312	0.995472	2	1
1830	D	2023-05-12 20:00:00	0.635704	0.748783	0.623503	0.897625	1	0.990021	0.988604	0.963267	0.998277	3	1
1831	I	2023-05-12 20:00:00	0.751524	0.72268	0.798125	0.590719	1	0.990173	0.983588	0.931026	0.994326	6	1
1832	A	2023-05-13 04:00:00	0.565747	0.68744	0.681947	0.854757	0.995623	0.977616	0.984027	0.856788	0.993418	4	1
1833	B	2023-05-13 04:00:00	0.697242	0.66464	0.679781	0.90077	1	0.980892	0.968259	0.889528	0.997267	3	0
1834	C	2023-05-13 04:00:00	0.759071	0.540126	0.500079	0.921663	1	0.988292	0.965912	0.900624	0.9996	3	1
1835	H	2023-05-13 04:00:00	0.614224	0.504298	0.716092	0.883066	0.999142	0.970761	0.949038	0.85339	0.99241	3	1
1836	E	2023-05-13 04:00:00	0.755298	0.682192	0.640056	0.947834	1	0.998544	0.997653	0.95254	0.998771	2	1
1837	F	2023-05-13 04:00:00	0.638897	0.426325	0.621731	0.819639	1	0.991174	0.984109	0.930869	0.998279	4	1
1838	G	2023-05-13 04:00:00	0.580261	0.484049	0.616178	0.897955	1	0.987261	0.97175	0.887297	0.998544	3	1
1839	H	2023-05-13 04:00:00	0.636894	0.360277	0.689312	0.877436	1	0.976645	0.965651	0.848029	0.99495	3	1
1840	I	2023-05-13 04:00:00	0.833672	0.648173	0.587784	0.697691	0.999261	0.966333	0.977789	0.917047	0.988326	5	1
1841	G	2023-05-13 04:00:00	0.603745	0.503773	0.674701	0.820805	0.957853	0.946618	0.943721	0.192238	0.994753	4	1
1842	I	2023-05-13 04:00:00	0.795065	0.643649	0.558837	0.630965	1	0.964816	0.980899	0.937258	0.990307	6	1
1843	H	2023-05-13 04:00:00	0.576778	0.573005	0.678284	0.918034	0.982934	0.97525	0.94326	0.787686	0.997351	2	1
1844	H	2023-05-13 04:00:00	0.571843	0.522827	0.611925	0.915109	0.998817	0.976433	0.936077	0.835884	0.994454	3	1
1845	J	2023-05-13 04:00:00	0.784906	0.779907	0.534617					0.912991	0.998896	7	0
1846	I	2023-05-13 04:00:00	0.691089	0.475544	0.670802	0.812426	0.998817	0.983318	0.982304	0.910184	0.997072	4	1
1847	J	2023-05-13 04:00:00	0.846154	0.703183	0.546511	0.899494	1	0.974765	0.967156	0.930106	0.990447	3	1
1848	K	2023-05-13 04:00:00	0.62061	0.680202	0.651583	0.868749	0.990979	0.966485	0.978291	0.892222	0.991155	4	1
1849	H	2023-05-13 04:00:00	0.622061	0.592404	0.757845	0.906158	0.985345	0.976585	0.939949	0.79977	0.994849	3	1
1850	L	2023-05-13 04:00:00	0.643541	0.690154	0.655561	0.966351	0.998965	0.99454	0.984651	0.929172	0.997762	2	1
1851	F	2023-05-13 04:00:00	0.598839	0.664079	0.671235	0.913239	1	0.993176	0.977388	0.919904	0.998717	3	1
1852	M	2023-05-13 04:00:00	0.616836	0.50884	0.629214	0.924148	1	0.988171	0.995666	0.810529	0.996463	3	1
1853	J	2023-05-13 04:00:00	0.699274	0.66663	0.556317	0.901473	1	0.973612	0.980277	0.916387	0.983439	3	1
1854	N	2023-05-13 04:00:00	0.633962	0.623944	0.637366	0.918738	0.994661	0.988292	0.959672	0.926331	0.995079	2	1
1855	O	2023-05-13 04:00:00	0.633091	0.676764	0.642486	0.941038	0.992487	0.981741	0.95606	0.937155	0.995767	2	1
1856	N	2023-05-13 04:00:00	0.830885	0.674592	0.80167	0.944975	0.995268	0.972096	0.964668	0.885786	0.999043	3	1
1857	P	2023-05-13 04:00:00	0.734398	0.445506	0.47452	0.918694	1	0.991265	0.974078	0.909486	0.999604	3	1
1858	Q	2023-05-13 04:00:00	0.691727	0.661021	0.529694	0.939894	1	0.995026	0.975723	0.953488	0.999517	2	1
1859	H	2023-05-13 04:00:00	0.599129	0.496535	0.620117	0.874599	1	0.954686	0.938705	0.767153	0.994305	3	1
1860	R	2023-05-13 04:00:00	0.581306	0.564844	0.655246	0.865956	0.997116	0.968153	0.96848	0.801992	0.997655	4	1
1861	S	2023-05-13 04:00:00	0.679826	0.534354	0.543636	0.796041	0.964167	0.925781	0.917779	0.610931	0.994248	4	1
1862	T	2023-05-13 04:00:00	0.691147	0.545754	0.612476	0.955641	1	0.99454	0.94954	0.843075	0.995658	2	1
1863	D	2023-05-13 04:00:00	0.653991	0.759459	0.637602	0.898724	1	0.989657	0.988885	0.962861	0.99798	3	1
1864	I	2023-05-13 04:00:00	0.740203	0.720172	0.797732	0.590719	1	0.990173	0.983588	0.929206	0.99444	6	1
1865	A	2023-05-13 08:00:00	0.561974	0.690697	0.694943	0.848082	0.992591	0.977191	0.98437	0.851241	0.993314	4	1
1866	B	2023-05-13 08:00:00	0.686212	0.626459	0.63709	0.887442	0.994528	0.978162	0.968801	0.887567	0.997227	3	1
1867	C	2023-05-13 08:00:00	0.755298	0.510142	0.487161	0.915989	1	0.988201	0.965109	0.900685	0.99953	3	1
1868	H	2023-05-13 08:00:00	0.566909	0.368818	0.643549	0.897647	0.999512	0.972338	0.951145	0.854836	0.993468	3	1
1869	E	2023-05-13 08:00:00	0.773875	0.681469	0.630545	0.950341	1	0.998332	0.997412	0.952478	0.998697	2	1
1870	F	2023-05-13 08:00:00	0.638607	0.418363	0.611964	0.826281	1	0.992144	0.984049	0.931309	0.998253	4	1
1871	G	2023-05-13 08:00:00	0.587518	0.509925	0.608578	0.908291	1	0.987868	0.972613	0.888718	0.998579	3	1
1872	H	2023-05-13 08:00:00	0.635443	0.348696	0.687854	0.883176	1	0.976039	0.967416	0.848803	0.994372	6	1
1873	I	2023-05-13 08:00:00	0.825544	0.64944	0.586878	0.697405	0.999556	0.969973	0.981722	0.919019	0.988907	5	1
1874	G	2023-05-13 08:00:00	0.577155	0.50504	0.667809	0.820915	0.934339	0.940249	0.938043	0.172261	0.991354	4	1
1875	I	2023-05-13 08:00:00	0.78897	0.645821	0.562264	0.614911	1	0.968456	0.9811	0.938492	0.990635	6	1
1876	H	2023-05-13 08:00:00	0.576778	0.56859	0.67628	0.921443	0.983333	0.975068	0.943721	0.788044	0.997242	2	1
1877	H	2023-05-13 08:00:00	0.554717	0.513255	0.599756	0.916648	0.998758	0.976615	0.937642	0.838184	0.994669	3	1
1878	J	2023-05-13 08:00:00	0.781132	0.741545	0.534302	0.930724	1	0.985138	0.991332	0.913369	0.996904	2	1
1879	I	2023-05-13 08:00:00	0.687547	0.438992	0.665721	0.812184	0.998817	0.982408	0.981822	0.909796	0.997475	4	1
1880	J	2023-05-13 08:00:00	0.844702	0.701192	0.54462	0.901254	1	0.97522	0.962581	0.929515	0.990369	3	1
1881	K	2023-05-13 08:00:00	0.606386	0.677307	0.650953	0.870332	0.990535	0.966394	0.975442	0.890861	0.990926	4	1
1882	H	2023-05-13 08:00:00	0.614804	0.588423	0.761543	0.902199	0.984812	0.976979	0.940752	0.79912	0.994316	3	1
1883	L	2023-05-13 08:00:00	0.658055	0.686716	0.643746	0.966791	0.99793	0.994237	0.983909	0.928766	0.996383	2	1
1884	F	2023-05-13 08:00:00	0.58926	0.663174	0.654261	0.906598	1	0.992963	0.982866	0.920784	0.999042	3	1
1885	M	2023-05-13 08:00:00	0.61103	0.503049	0.625	0.922366	1	0.988778	0.994904	0.810653	0.996459	3	1
1886	J	2023-05-13 08:00:00	0.68447	0.661564	0.561043	0.899494	1	0.973309	0.98102	0.916522	0.983532	3	1
1887	N	2023-05-13 08:00:00	0.63135	0.628648	0.62118	0.922762	0.994099	0.980437	0.958488	0.925857	0.995332	2	1
1888	O	2023-05-13 08:00:00	0.629028	0.65324	0.613697	0.933187	0.992029	0.982469	0.957886	0.936005	0.995849	2	1
1889	N	2023-05-13 08:00:00	0.841771	0.677307	0.836326	0.944975	0.99512	0.970883	0.969864	0.88326	0.999098	4	1
1890	P	2023-05-13 08:00:00	0.735849	0.444782	0.481372	0.923356	1	0.991689	0.973757	0.909554	0.999524	3	1
1891	Q	2023-05-13 08:00:00	0.687954	0.652154	0.530167	0.939037	1	0.995147	0.975442	0.953487	0.99949	2	1
1892	H	2023-05-13 08:00:00	0.584035	0.497982	0.614997	0.869101	1	0.95417	0.937842	0.780412	0.994409	4	1
1893	R	2023-05-13 08:00:00	0.571001	0.535114	0.555057	0.855531	0.996673	0.957962	0.965049	0.801519	0.997537	4	1
1894	S	2023-05-13 08:00:00	0.677213	0.508659	0.485507	0.802749	0.981721	0.92111	0.910295	0.611486	0.994313	4	1
1895	T	2023-05-13 08:00:00	0.693469	0.544306	0.6033	0.957225	1	0.994844	0.946831	0.842899	0.995408	2	1
1896	D	2023-05-13 08:00:00	0.63106	0.748783	0.626497	0.897911	1	0.989779	0.989607	0.962861	0.998173	3	1
1897	I	2023-05-13 08:00:00	0.73643	0.719816	0.795762	0.599076	1	0.988929	0.983287	0.928624	0.994506	6	1
1898	A	2023-05-13 12:00:00	0.554717	0.685088	0.686279	0.852628	0.993463	0.977282	0.985544	0.849549	0.992743	4	1
1899	B	2023-05-13 12:00:00	0.637446	0.457811	0.566753	0.894392	1	0.980588	0.969021	0.89254	0.997535	3	1
1900	C	2023-05-13 12:00:00	0.748621	0.489459	0.48212	0.914889	1	0.987898	0.967597	0.900821	0.999558	3	1
1901	H	2023-05-13 12:00:00	0.50566	0.338038	0.637248	0.892611	0.999763	0.972945	0.945868	0.85447	0.993878	6	1
1902	E	2023-05-13 12:00:00	0.712917	0.656678	0.595278	0.956917	1	0.998514	0.997311	0.953248	0.998806	2	1
1903	F	2023-05-13 12:00:00	0.620319	0.367153	0.554151	0.815549	1	0.992114	0.982023	0.931363	0.998144	4	1
1904	G	2023-05-13 12:00:00	0.576778	0.481878	0.594006	0.910051	1	0.987868	0.973255	0.888921	0.998556	3	1
1905	H	2023-05-13 12:00:00	0.612104	0.32282	0.664894	0.875962	1	0.977555	0.965952	0.849277	0.99419	6	1
1906	I	2023-05-13 12:00:00	0.805515	0.650707	0.585145	0.699538	1	0.970883	0.981381	0.921175	0.989613	5	1
1907	G	2023-05-13 12:00:00	0.548505	0.512097	0.673834	0.807895	0.929459	0.930543	0.934271	0.140656	0.986614	4	1
1908	I	2023-05-13 12:00:00	0.777068	0.647269	0.560058	0.614251	1	0.969973	0.980899	0.93979	0.991193	6	1
1909	H	2023-05-13 12:00:00	0.565457	0.569187	0.676997	0.920497	0.983023	0.975463	0.94328	0.790042	0.997514	2	1
1910	J	2023-05-13 12:00:00	0.593904	0.554983	0.646503	0.883879	1	0.970883	0.977408	0.91524	0.988062	3	1
1911	H	2023-05-13 12:00:00	0.511756	0.463674	0.584397	0.916099	0.999127	0.976403	0.937963	0.834667	0.994866	3	1
1912	J	2023-05-13 12:00:00	0.722496	0.746612	0.522133	0.925445	1	0.987261	0.991633	0.913789	0.997628	2	1
1913	I	2023-05-13 12:00:00	0.659274	0.374753	0.652135	0.806972	0.999556	0.983621	0.983568	0.910061	0.997986	4	1
1914	J	2023-05-13 12:00:00	0.824964	0.699021	0.540446	0.903673	1	0.971671	0.966453	0.929318	0.990294	3	1
1915	K	2023-05-13 12:00:00	0.569231	0.672783	0.644809	0.867187	0.990535	0.965969	0.974017	0.890181	0.990872	4	1
1916	H	2023-05-13 12:00:00	0.61045	0.589418	0.759416	0.902727	0.98394	0.976736	0.944142	0.797329	0.994452	3	1
1917	L	2023-05-13 12:00:00	0.640639	0.64944	0.606727	0.967011	0.998225	0.99454	0.983528	0.929443	0.997855	2	1
1918	F	2023-05-13 12:00:00	0.548621	0.58712	0.616612	0.903189	1	0.993085	0.979936	0.923557	0.999025	3	1
1919	M	2023-05-13 12:00:00	0.584035	0.496535	0.615666	0.925753	1	0.988778	0.995285	0.810101	0.996565	3	1
1920	J	2023-05-13 12:00:00	0.676633	0.65903	0.561043	0.892457	1	0.971793	0.980699	0.916319	0.983007	3	1
1921	N	2023-05-13 12:00:00	0.637155	0.618732	0.606411	0.922652	0.992473	0.981771	0.958789	0.926331	0.995628	2	1
1922	O	2023-05-13 12:00:00	0.632511	0.636411	0.599362	0.939477	0.991142	0.982499	0.957665	0.935464	0.996061	2	1
1923	N	2023-05-13 12:00:00	0.747547	0.650164	0.755435	0.944975	0.994824	0.970276	0.964928	0.897912	0.998654	3	1
1924	P	2023-05-13 12:00:00	0.734398	0.460163	0.483144	0.922322	1	0.992205	0.973476	0.909757	0.999578	3	1
1925	Q	2023-05-13 12:00:00	0.691727	0.672077	0.53186	0.937871	1	0.955626	0.948597	0.953531	0.999508	5	1
1926	H	2023-05-13 12:00:00	0.550073	0.487849	0.614209	0.85828	1	0.952836	0.937943	0.773985	0.994105	4	1
1927	R	2023-05-13 12:00:00	0.523309	0.485895	0.444549	0.852034	0.99793	0.961207	0.965631	0.804157	0.997402	4	1
1928	S	2023-05-13 12:00:00	0.648186	0.41782	0.252875	0.784187	0.997131	0.924628	0.904396	0.613766	0.994505	5	1
1929	T	2023-05-13 12:00:00	0.691727	0.548468	0.605348	0.955971	1	0.99454	0.949519	0.842798	0.995113	2	1
1930	D	2023-05-13 12:00:00	0.591292	0.738469	0.613658	0.897031	1	0.989536	0.990129	0.962997	0.997941	3	1
1931	I	2023-05-13 12:00:00	0.740203	0.719451	0.800095	0.599736	1	0.988626	0.984491	0.928638	0.994545	6	1
1932	A	2023-05-13 16:00:00	0.54775	0.681288	0.679584	0.852628	0.993463	0.977282	0.985544	0.853676	0.992652	4	1
1933	B	2023-05-13 16:00:00	0.61074	0.380906	0.567029	0.898548	1	0.980588	0.968179	0.893006	0.997522	3	1
1934	C	2023-05-13 16:00:00	0.743977	0.491559	0.488343	0.917748	1	0.987837	0.962581	0.900746	0.999502	3	1
1935	H	2023-05-13 16:00:00	0.523657	0.334057	0.658396	0.890059	0.999556	0.973552	0.952609	0.854666	0.994307	6	1
1936	E	2023-05-13 16:00:00	0.659216	0.630259	0.588693	0.955025	1	0.998423	0.997974	0.953792	0.998255	2	1
1937	F	2023-05-13 16:00:00	0.620319	0.388687	0.571243	0.825687	1	0.992114	0.982926	0.931005	0.998198	4	1
1938	G	2023-05-13 16:00:00	0.561974	0.440982	0.58865	0.906752	1	0.986351	0.972392	0.88635	0.998474	3	1
1939	H	2023-05-13 16:00:00	0.608447	0.315763	0.66072	0.875962	1	0.977555	0.965932	0.849035	0.995455	6	1
1940	I	2023-05-13 16:00:00	0.8	0.653059	0.585775	0.699538	1	0.970883	0.981381	0.92327	0.990058	5	1
1941	G	2023-05-13 16:00:00	0.572801	0.520963	0.689863	0.807895	0.929459	0.930543	0.934271	0.105269	0.99354	4	1
1942	I	2023-05-13 16:00:00	0.777068	0.656316	0.560334	0.612712	1	0.969973	0.983608	0.940896	0.991737	6	1
1943	H	2023-05-13 16:00:00	0.551234	0.566835	0.678147	0.920497	0.983023	0.975463	0.94328	0.791473	0.997493	2	1
1944	J	2023-05-13 16:00:00	0.591292	0.560049	0.638587	0.883879	1	0.970276	0.977147	0.914831	0.987843	3	1
1945	H	2023-05-13 16:00:00	0.515239	0.46979	0.593415	0.906818	0.998625	0.976342	0.93712	0.838049	0.994566	3	1
1946	J	2023-05-13 16:00:00	0.722206	0.730507	0.518392	0.932703	1	0.992417	0.989045	0.915609	0.998903	2	1
1947	I	2023-05-13 16:00:00	0.639478	0.370411	0.659932	0.80055	0.998669	0.982712	0.982745	0.910092	0.997426	4	1
1948	J	2023-05-13 16:00:00	0.78926	0.68744	0.535917	0.903673	1	0.974249	0.966132	0.926901	0.990598	3	1
1949	K	2023-05-13 16:00:00	0.543396	0.667535	0.643864	0.867187	0.990535	0.965969	0.974017	0.890298	0.990964	4	1
1950	H	2023-05-13 16:00:00	0.607257	0.586758	0.763615	0.902727	0.98394	0.976736	0.944142	0.796463	0.994617	3	1
1951	L	2023-05-13 16:00:00	0.588389	0.625011	0.590186	0.967011	0.998817	0.994237	0.983949	0.929578	0.997493	2	1
1952	F	2023-05-13 16:00:00	0.534107	0.587409	0.622204	0.903431	1	0.992175	0.980618	0.922407	0.998843	3	1
1953	M	2023-05-13 16:00:00	0.573004	0.497078	0.619683	0.925753	1	0.988778	0.995285	0.810651	0.996721	3	1
1954	J	2023-05-13 16:00:00	0.6627	0.657402	0.559861	0.892457	1	0.972096	0.980658	0.916387	0.983345	3	1
1955	N	2023-05-13 16:00:00	0.628157	0.60384	0.582112	0.925137	0.992044	0.982317	0.958448	0.926128	0.995704	2	1
1956	O	2023-05-13 16:00:00	0.626705	0.616507	0.589753	0.943105	0.990772	0.983864	0.957966	0.934922	0.99591	2	1
1957	N	2023-05-13 16:00:00	0.723338	0.632068	0.632601	0.944975	0.994824	0.970276	0.964928	0.900808	0.998843	3	1
1958	P	2023-05-13 16:00:00	0.728012	0.446773	0.479009	0.920057	1	0.991447	0.973676	0.90996	0.999565	3	1
1959	Q	2023-05-13 16:00:00	0.683599	0.623401	0.52426	0.937871	1	0.955626	0.948597	0.953587	0.999539	5	1
1960	H	2023-05-13 16:00:00	0.53701	0.468306	0.611059	0.874687	1	0.951744	0.937541	0.760659	0.994447	3	1
1961	R	2023-05-13 16:00:00	0.499565	0.474911	0.399496	0.852034	0.99793	0.961207	0.965631	0.809636	0.996929	4	1
1962	S	2023-05-13 16:00:00	0.648476	0.436458	0.330577	0.784187	0.997131	0.924628	0.904396	0.608239	0.993709	5	1
1963	T	2023-05-13 16:00:00	0.68418	0.547563	0.607396	0.955971	1	0.99454	0.948857	0.843224	0.995186	2	1
1964	D	2023-05-13 16:00:00	0.587808	0.731954	0.61354	0.897031	1	0.989536	0.990129	0.963064	0.99812	3	1
1965	I	2023-05-13 16:00:00	0.740203	0.716571	0.806396	0.595558	1	0.989051	0.98443	0.928415	0.994544	6	1
1966	B	2023-05-13 20:00:00	0.63164	0.498163	0.639335	0.899692	1	0.982408	0.968981	0.892023	0.997462	3	0
1967	C	2023-05-13 20:00:00	0.741655	0.502669	0.494683	0.921201	1	0.988323	0.966273	0.900807	0.99956	3	1
1968	H	2023-05-13 20:00:00	0.577939	0.463728	0.734956	0.896415	1	0.976069	0.949921	0.857948	0.99476	3	1
1969	E	2023-05-13 20:00:00	0.685631	0.633516	0.6033	0.956499	1	0.998332	0.997632	0.953531	0.998786	2	1
1970	F	2023-05-13 20:00:00	0.627286	0.432839	0.598535	0.831361	1	0.992144	0.979856	0.930259	0.998233	4	1
1971	G	2023-05-13 20:00:00	0.569231	0.481516	0.612713	0.908071	1	0.986048	0.973155	0.885742	0.998357	3	1
1972	H	2023-05-13 20:00:00	0.614891	0.328068	0.68498	0.873675	1	0.974522	0.965972	0.84868	0.995159	6	1
1973	I	2023-05-13 20:00:00	0.777068	0.657945	0.562973	0.610732	1	0.971489	0.981662	0.94186	0.991992	6	1
1974	H	2023-05-13 20:00:00	0.53672	0.505058	0.620707	0.915329	0.999068	0.976069	0.938625	0.835208	0.994784	3	1
1975	I	2023-05-13 20:00:00	0.66	0.461068	0.676315	0.798153	0.998077	0.982105	0.981662	0.910469	0.997076	4	1
1976	F	2023-05-13 20:00:00	0.548621	0.622007	0.655797	0.902969	1	0.992114	0.979394	0.921393	0.998655	3	1
1977	N	2023-05-13 20:00:00	0.640058	0.601506	0.602906	0.923004	0.992931	0.982499	0.957585	0.927481	0.995397	2	1
1978	O	2023-05-13 20:00:00	0.638026	0.646907	0.612516	0.944491	0.991659	0.984501	0.958227	0.935599	0.995815	2	1
1979	P	2023-05-13 20:00:00	0.731785	0.469392	0.495195	0.924896	1	0.992963	0.974379	0.909757	0.999624	3	1
1980	I	2023-05-13 20:00:00	0.740784	0.715849	0.800095	0.602595	1	0.988656	0.984009	0.927785	0.99457	6	1
1981	A	2023-05-14	0.540203	0.677307	0.683129	0.84247	0.991585	0.973582	0.982161	0.833043	0.990246	4	1
1982	B	2023-05-14	0.66357	0.640935	0.680214	0.900462	1	0.981802	0.969704	0.888808	0.99743	3	0
1983	C	2023-05-14	0.751524	0.562619	0.520361	0.93079	1	0.991143	0.966393	0.900469	0.999651	3	1
1984	H	2023-05-14	0.595646	0.532906	0.740036	0.900264	1	0.978192	0.952609	0.859841	0.994823	3	1
1985	E	2023-05-14	0.723367	0.667173	0.629919	0.956499	1	0.998332	0.997632	0.953051	0.998836	2	1
1986	F	2023-05-14	0.644702	0.535078	0.636618	0.831361	1	0.992144	0.979856	0.928772	0.998285	4	1
1987	G	2023-05-14	0.587518	0.550097	0.630671	0.917088	1	0.986655	0.972352	0.887433	0.998322	3	1
1988	H	2023-05-14	0.617823	0.34363	0.699118	0.873675	1	0.977859	0.968018	0.848131	0.996059	6	1
1989	I	2023-05-14	0.808999	0.660659	0.594085	0.697581	0.999704	0.974522	0.983066	0.926562	0.991527	5	1
1990	G	2023-05-14	0.596865	0.516078	0.69451	0.832593	0.917184	0.951168	0.938765	0.231224		4	0
1991	I	2023-05-14	0.777068	0.661202	0.564351	0.610732	1	0.971489	0.981662	0.942697	0.99247	6	1
1992	H	2023-05-14	0.565747	0.573313	0.682152	0.921575	0.983392	0.975159	0.943079	0.792023	0.997457	2	1
1993	J	2023-05-14	0.606096	0.564392	0.637996	0.888278	1	0.969973	0.981842	0.916344	0.987997	3	1
1994	H	2023-05-14	0.551234	0.530644	0.636657	0.915879	0.998802	0.976979	0.938765	0.833652	0.9946	3	1
1995	J	2023-05-14	0.805225	0.75584	0.530128	0.930943	1	0.993327	0.988524	0.913593	0.999207	2	1
1996	I	2023-05-14	0.670943	0.511554	0.685019	0.799472	0.997338	0.981802	0.982324	0.910431	0.997021	4	1
1997	J	2023-05-14	0.801161	0.693412	0.54403	0.903673	1	0.975978	0.970286	0.927605	0.991266	3	1
1998	K	2023-05-14	0.569231	0.672602	0.656427	0.867935	0.99024	0.967061	0.974118	0.888787	0.991003	4	1
1999	H	2023-05-14	0.614804	0.588766	0.760019	0.903849	0.983836	0.976736	0.941354	0.796454	0.994864	3	1
[truncated: 30,270 more rows]
